# Supplementary material
Source: publisher site journal article supplement (https://www.dovepress.com/get_supplementary_file.php?f=303183.docx)
Supplement: Supplementary file 1 [file get_supplementary_file.php]

**Supplementary Table.1 The intact information of subjects in GSE109178**

| **Accession** | **Title** | **Source name** | **Age** | **Tissue** | **Pathology** | **Sex** | **Pathology note** |
| --- | --- | --- | --- | --- | --- | --- | --- |
| GSM2934802 | Asynchronous remodeling in DMD (MIDO-BMD_Pos-10UP) | vastus lateralis | 8 | vastus lateralis | mild | M | nice biopsy, relatively static mild myopathy, some fiber size variation |
| GSM2934803 | Asynchronous remodeling in DMD (MIDO-BMD_Pos-11UP) | vastus lateralis | 12.7 | vastus lateralis | moderate | M | Very little muscle in biopsy, few focal regions of poorly preserved, atrophic fibers |
| GSM2934804 | Asynchronous remodeling in DMD (MIDO-BMD_Pos-12UP) | vastus lateralis | 6.4 | vastus lateralis | severe | M | biopsy OK, varying fiber orientation, considerable endomysial fat, central nuclei, isolated areas of degen/regen |
| GSM2934805 | Asynchronous remodeling in DMD (MIDO-BMD_Pos-14UP) | vastus lateralis | 5.8 | vastus lateralis | severe | M | Biopsy not great, freeze artefact, mid stage Duchenne? |
| GSM2934806 | Asynchronous remodeling in DMD (MIDO-BMD_Pos-15UP) | vastus lateralis | 60.8 | vastus lateralis | mild | M | nice biopsy, mild dystrophy with many central nuclei. Not much endomysial fibrosis, but more extensive perimysial fibrosis/fatty replacement. No overt degeneration. |
| GSM2934807 | Asynchronous remodeling in DMD (MIDO-BMD_Pos-1UP) | vastus lateralis | 11 | vastus lateralis | mild | M | nice biopsy; very mild dystrophy; some fiber size variation; few focal areas have increased fibrosis |
| GSM2934808 | Asynchronous remodeling in DMD (MIDO-BMD_Pos-3UP) | vastus lateralis | 37.6 | vastus lateralis | mild | M | excellent condition. It showed fiber size variation, mild fibrosis, numerous central nuclei, 1-2 hypercontracted fibers, and a few small areas of regeneration. This pathology is characteristic of an early stage dystrophy |
| GSM2934809 | Asynchronous remodeling in DMD (MIDO-BMD_Pos-4UP) | vastus lateralis | 43 | vastus lateralis | moderate | M | Nice biopsy. Large fiber size variation. Splitting and central nuclei. Lobulated fibers. Increase in both endo and perymisial connective. Some adipose infiltraction. End stage dystrophy. |
| GSM2934810 | Asynchronous remodeling in DMD (MIDO-BMD_Pos-6UP) | vastus lateralis | 2.5 | vastus lateralis | mild | M | nice biopsy, variable endomysial fibrosis, many hypercontracted fibers, central nuclei, early stage DYSTROPHIC |
| GSM2934811 | Asynchronous remodeling in DMD (MIDO-BMD_Pos-7UP) | vastus lateralis | 20 | vastus lateralis | mild | M | nice biopsy, variable endomysial fibrosis, many hypercontracted fibers, central nuclei, early stage DYSTROPHIC |
| GSM2934812 | Asynchronous remodeling in DMD (MIDO-BMD_Pos-8UP) | vastus lateralis | 12.2 | vastus lateralis | moderate | M | Good (#2 Description: Myopathic, 2nd: nice biopsy, fiber size variation, variable fibrosis, minor fatty replacement, numerous central nuclei, areas of degen/regen |
| GSM2934813 | Asynchronous remodeling in DMD (MIDO-CTRL_Pos-1UP) | vastus lateralis | NA | vastus lateralis | NA | NA | NA |
| GSM2934814 | Asynchronous remodeling in DMD (MIDO-CTRL_Pos-2UP) | vastus lateralis | NA | vastus lateralis | NA | NA | NA |
| GSM2934815 | Asynchronous remodeling in DMD (MIDO-CTRL_Pos-3UP) | vastus lateralis | NA | vastus lateralis | NA | NA | NA |
| GSM2934816 | Asynchronous remodeling in DMD (MIDO-CTRL_Pos-4UP) | vastus lateralis | NA | vastus lateralis | NA | NA | NA |
| GSM2934817 | Asynchronous remodeling in DMD (MIDO-CTRL_Pos-5UP) | vastus lateralis | NA | vastus lateralis | NA | NA | NA |
| GSM2934818 | Asynchronous remodeling in DMD (MIDO-CTRL_Pos-6UP) | vastus lateralis | NA | vastus lateralis | NA | NA | NA |
| GSM2934819 | Asynchronous remodeling in DMD (MIDO-DMD_Pos-10UP) | vastus lateralis | 7 | vastus lateralis | severe | Male | Description: nice biopsy, severe mid/end stage dystrophy, very extensive fibrosis (endomysial, perimysial). A strange large fibrotic blood vessel with a second fibrotic blood vessel inside of it? Fiber size variation, rounded fibers, failed regeneration |
| GSM2934820 | Asynchronous remodeling in DMD (MIDO-DMD_Pos-11UP) | vastus lateralis | 0.9 | vastus lateralis | moderate | Male | Description: nice biopsy, young child with DYSTROPHIC process, central nuclei, fiber size variation |
| GSM2934821 | Asynchronous remodeling in DMD (MIDO-DMD_Pos-12UP) | vastus lateralis | 4 | vastus lateralis | severe | Male | nice biopsy, dystrophic, fiber size variation, degen/regen, focal fatty infiltration and fibrosis, many fascicles with little or no endomysial fibrosis |
| GSM2934822 | Asynchronous remodeling in DMD (MIDO-DMD_Pos-13UP) | vastus lateralis | 1.6 | vastus lateralis | severe | Male | Description: good condition. It showed fiber size variation, many hypercontracted fibers, cells with central nuclei, numerous areas of active regeneration and several necrotic fibers, mid stage dystrophy |
| GSM2934823 | Asynchronous remodeling in DMD (MIDO-DMD_Pos-14UP) | vastus lateralis | 4 | vastus lateralis | moderate | Male | nice biopsy, although some freeze artefact. early stage DMD with focal grouped necrosis, some fiber size variation but little fibrosis, young child |
| GSM2934824 | Asynchronous remodeling in DMD (MIDO-DMD_Pos-15UP) | vastus lateralis | 8 | vastus lateralis | moderate | Male | nice biopsy, fiber size variation, endomysial fibrosis. looks relatively mild for DMD with larger fibers with less endomysial fibrosis than typical |
| GSM2934825 | Asynchronous remodeling in DMD (MIDO-DMD_Pos-16UP) | vastus lateralis | 5 | vastus lateralis | severe | Male | Description: nice biopsy, severe dystrophy, fiber size variation, necrosis, fibrosis |
| GSM2934826 | Asynchronous remodeling in DMD (MIDO-DMD_Pos-17UP) | vastus lateralis | 6 | vastus lateralis | severe | Male | Description: nice biopsy, severe dystrophy, endomysial fibrosis, degen/regen, fiber size variation. |
| GSM2934827 | Asynchronous remodeling in DMD (MIDO-DMD_Pos-1UP) | vastus lateralis | 1.9 | vastus lateralis | severe | Male | nice biopsy, DMD like, degen/regen, endomysial fibrosis |
| GSM2934828 | Asynchronous remodeling in DMD (MIDO-DMD_Pos-2UP) | vastus lateralis | 4 | vastus lateralis | severe | Male | Description: nice biopsy, severe dystrophy, considerable inflammation/necrosis. |
| GSM2934829 | Asynchronous remodeling in DMD (MIDO-DMD_Pos-3UP) | vastus lateralis | 3 | vastus lateralis | severe | Male | Description: Very nice biopsy, fiber size variation, several necrotic fibers and large areas of grouped regeneration, numerous central nuclei, one large area of all rounded fibers, mid stage dystrophy |
| GSM2934830 | Asynchronous remodeling in DMD (MIDO-DMD_Pos-4UP) | vastus lateralis | 3 | vastus lateralis | severe | Male | nice biopsy, severe dystropy, fiber size variation, necrotic fibers, regeneration |
| GSM2934831 | Asynchronous remodeling in DMD (MIDO-DMD_Pos-5UP) | vastus lateralis | 1.9 | vastus lateralis | severe | Male | Description: very nice biopsy, variation in fiber size and several hypercontracted or centrally nucleated fibers. We also found focal fatty replacement and many areas of attempted regeneration, characteristic of an early stage dystrophy |
| GSM2934832 | Asynchronous remodeling in DMD (MIDO-DMD_Pos-6UP) | vastus lateralis | 1 | vastus lateralis | moderate | Male | Description: very nice biopsy, fiber size variation, hypercontracted fibers, cells with central nuclei, small areas of active regen and necrosis, ealry stage dystrophy |
| GSM2934833 | Asynchronous remodeling in DMD (MIDO-DMD_Pos-7UP) | vastus lateralis | 2 | vastus lateralis | severe | Male | Description: nice biopsy, small rounded fibers with frequent central nuclei, increased endomysial fibrosis, several areas of focal inflammation, necrotic cells, degeneration, early stage dystrophy |
| GSM2934834 | Asynchronous remodeling in DMD (MIDO-DMD_Pos-8UP) | vastus lateralis | 3.5 | vastus lateralis | severe | Male | Description: nice biopsy, tons of hypercontracted fibers, atrophic fibers, size variation, central nuclei, early/mid stage dystrophy, endomysial fibrosis, lots of nerve |
| GSM2934835 | Asynchronous remodeling in DMD (MIDO-DMD_Pos-9UP) | vastus lateralis | 7 | vastus lateralis | severe | Male | Description: nice biopsy, mid stage severe dystrophy, fiber size variation, endomysial fibrosis, fiber size variation, failed regeneration |
| GSM2934836 | Asynchronous remodeling in DMD (MIDO-DYS_Neg-5UP) | vastus lateralis | NA | vastus lateralis | mild | F | Nice biopsy, although artifactual space between fibers. Mild dystrophy/myopathy. Mild fiber size variation, few central nuclei. |
| GSM2934837 | Asynchronous remodeling in DMD (MIDO-DYS_Pos-2UP) | vastus lateralis | 28 | vastus lateralis | mod | M | nice biopsy, dysferlin-like with inflammation (both vascular, endomysial, and necrotic fibers). many fibers with infiltrating cells; great for a pathology study of inflammatory cells types. |
| GSM2934838 | Asynchronous remodeling in DMD (MIDO-DYS_Pos-3UP) | vastus lateralis | 16 | vastus lateralis | mild | M | mild dystrophic, about 20% of fibers with central nuclei, some fiber size variation, very mild focal increase in endomysial connective tissue. Occasional overt necrotic fibers, some inflammation both in perimysium and p |
| GSM2934839 | Asynchronous remodeling in DMD (MIDO-DYS_Pos-4UP) | vastus lateralis | 31 | vastus lateralis | severe | F | nice biopsy, large amount of fat, fiber size variation and central nuclei, many areas of degeneration and regeneration, mid/end stage DYSTROPHIC |
| GSM2934840 | Asynchronous remodeling in DMD (MIDO-DYS_Pos-5UP) | vastus lateralis | 19 | vastus lateralis | mild | F | Biopsy good, but not terrific. Some freeze artefact, fiber size variation, mild moderate fibrosis, some regenerating fibers, but no overt necrosis |
| GSM2934841 | Asynchronous remodeling in DMD (MIDO-DYS_Pos-6UP) | vastus lateralis | NA | vastus lateralis | severe | F | nice biopsy, considerable fatty replacement, remaining fascicles show a DYSTROPHIC picture. |
| GSM2934842 | Asynchronous remodeling in DMD (MIDO-DYS_Pos-8UP) | vastus lateralis | 20 | vastus lateralis | mild | M | nice biopsy, many isolated necrotic fibers in |
| GSM2934843 | Asynchronous remodeling in DMD (MIDO-DYS_Pos-9UP) | vastus lateralis | 12 | vastus lateralis | mild | F | mild chronic dystrophy, freeze artefact |
| GSM2934844 | Asynchronous remodeling in DMD (MIDO-FKRP_Pos-2UP) | vastus lateralis | 16 | vastus lateralis | moderate | F | Description: 1rst biopsy inadequate; 2nd nice, quite focal, some severe with failed regen, some mild, focal fibrosis, manifesting carrier like |
| GSM2934845 | Asynchronous remodeling in DMD (MIDO-FKRP_Pos-3UP) | vastus lateralis | 12 | vastus lateralis | mild | M | Nice biopsy, normal skeletal muscle; perhaps very slight fiber size variation |
| GSM2934846 | Asynchronous remodeling in DMD (MIDO-FKRP_Pos-5UP) | vastus lateralis | 40 | vastus lateralis | severe | M | Biopsy largely replaced by fibrofatty tissue, isolated groups of 3-10 fibers remaining, which look myopathic; all type I fibers |
| GSM2934847 | Asynchronous remodeling in DMD (MIDO-FKRP_Pos-6UP) | vastus lateralis | 22 | vastus lateralis | mild | F | diffuse endomysial inflammation, may be eosinophilic inclusions, little over degen/regen |
| GSM2934848 | Asynchronous remodeling in DMD (MIDO-FKRP_Pos-7UP) | vastus lateralis | 10 | vastus lateralis | mild | M | biopsy shows considerable preservation artefact, relatively mild pathology? |
| GSM2934849 | Asynchronous remodeling in DMD (MIDO-FKRP_Pos-8UP) | vastus lateralis | 6 | vastus lateralis | mild | M | Nice biopsy, very mild myopathy, some hypercontracted fibers, slight fiber size variation, mild increase in central nuclei |
| GSM2934850 | Asynchronous remodeling in DMD (MIDO-FKRP_Pos-9UP) | vastus lateralis | 31 | vastus lateralis | mild | F | biopsy eh, freeze artefact, desiccation; mild dystrophy? |

**Supplementary Table.2 The GO analysis of genes in black module (*p*<0.01)**

| **Category** | **Term** | **Count** | **PValue** | **Genes** |
| --- | --- | --- | --- | --- |
| GOTERM_BP_DIRECT | GO:0030198~extracellular matrix organization | 49 | 7.68E-12 | PXDN, SPOCK2, TNC, NPNT, COL3A1, DAG1, ITGA10, COL2A1, ITGB2, ITGAM, VCAM1, LAMB3, CD44, FGB, HPSE, ITGB8, SERAC1, FOXF2, COL6A3, TGFBI, COL6A1, LOX, THBS1, LAMB1, SPP1, COL4A2, COL4A1, OLFML2B, MYF5, CCDC80, HSPG2, OLFML2A, SPINT1, SPARC, NID2, COL5A3, COL5A2, COL5A1, CSGALNACT1, LAMA4, BGN, COL14A1, KAZALD1, COL1A2, MFAP2, LAMC1, COL1A1, JAM2, JAM3 |
| GOTERM_BP_DIRECT | GO:0006954~inflammatory response | 70 | 5.66E-10 | AIF1, LY86, TLR1, TIRAP, TLR2, TLR5, CXCL12, IL10, TLR8, MYD88, TNFRSF11A, CXCR4, SEMA7A, AOAH, CCL3L3, SERPINA3, VNN1, SYK, NFX1, PIK3CG, C5AR1, ADGRE2, LYN, LY96, LYZ, TNFRSF14, GAL, SIGLEC1, TNFRSF9, TNFAIP3, C3AR1, TNFRSF21, CCL2, C4B_2, CCR1, CCL8, TNFRSF8, PF4, ITGB2, AFAP1L2, FPR3, CCL4, MIF, TNFRSF1B, IL17B, FOLR2, PYCARD, THBS1, BLNK, SPP1, CSF1R, HAVCR2, PLP1, IL6, LIPA, HCK, CHI3L1, TRIL, ECM1, CCL18, LGALS9, CD180, CYBB, P2RX7, STAB1, CLEC7A, PARP4, THEMIS2, CD14, BMP6 |
| GOTERM_BP_DIRECT | GO:0007165~signal transduction | 153 | 1.28E-08 | GNA14, MOK, S100A6, CRABP1, PPP2R5A, HBS1L, TLR1, TLR2, TIRAP, PLPPR4, IQGAP2, TNFSF13, CD53, PLPPR1, CXCL12, CD48, SHD, MYD88, GRIN2D, RALB, STAM, UNC5C, CHRNA1, PAG1, GPR89A, DEPDC7, C5AR1, STK24, PRKAB2, PKIG, PLAUR, RND2, LILRB2, MAPK1, CD38, HIF1A, GAPVD1, ARRB2, PRDM4, CD33, STMN1, EXT2, NEK6, AKAP4, SH3GL1, OSTF1, CCL2, ERBB4, ERBB3, PTK7, CCL8, CD70, ELK3, CD72, GREM1, MDK, SOX8, CCL4, ALCAM, VDR, DOCK1, RAC2, CD69, FGB, TEK, HLA-DOA, TRAF4, CSF1R, TYROBP, MRC1, MRC2, S100A11, CD300C, ECM1, P2RX4, SALL2, PDE7B, LYVE1, RGS1, PKP1, PENK, CD300A, PDE7A, ANTXR1, CNIH1, XCL1, PLAU, IMPA2, SORL1, ARHGAP19, TNFRSF11A, PRMT2, EVI2A, IL4R, CSF2RB, DLG5, ARHGAP9, RAP2B, RSU1, NRXN2, LYN, LIMK1, CLIC1, PRKCB, ARHGAP30, CD83, DOK2, ARHGAP33, CHRM3, GRN, INPP4B, MAPRE2, PDE9A, MCC, TNFSF12-TNFSF13, SRGAP1, RIN3, PLPP5, TNFRSF21, PPP4R1, SPOCK2, TNFRSF8, FPR3, GNG11, PDE1C, SMOC1, PYCARD, ACTL6A, CALML5, HPGDS, FYB, SECTM1, SERGEF, CAPN5, LTK, C1ORF168, COL15A1, ARHGAP45, IGF1, SPARC, RACGAP1, CCL18, TNFSF8, LSP1, TENM4, RASSF4, FCGR2B, RPS6KA1, TENM1, CHN1, JAK2, FEZ2, BCAR3 |
| GOTERM_BP_DIRECT | GO:0007155~cell adhesion | 73 | 1.52E-07 | L1CAM, CXCL12, SRPX, S1PR1, CD44, FAP, TGFBI, CLEC4A, LOXL2, SPON1, PRKCA, PARVG, ADGRE2, PCDHB6, SIGLEC10, PCDHB2, MFGE8, CERCAM, THY1, NCAM1, CD33, ANOS1, LAMC1, COL1A1, ADAM12, CCL2, CYP1B1, TNC, CCR1, NINJ2, PTK7, PCDHB15, ITGA10, IL32, ITGB2, PCDHGC4, CD72, CCL4, ITGAM, ALCAM, VCAM1, SEMA5A, LAMB3, SORBS1, COL6A6, ITGB8, COL6A3, CD2, COL6A1, THBS1, GPNMB, LAMB1, SELPLG, THBS3, SPP1, HAPLN2, HAPLN3, HCK, COL15A1, CD99, NID2, PCDH17, EMILIN2, COL5A1, LYVE1, LAMA4, PKP1, STAB1, CD300A, CDON, FBLN7, DSC2, THEMIS2 |
| GOTERM_BP_DIRECT | GO:0030199~collagen fibril organization | 15 | 1.63E-06 | CYP1B1, COL3A1, COL2A1, COL5A3, GREM1, COL5A2, COL5A1, COL14A1, P4HA1, PLOD3, COL1A2, LOX, COL1A1, LOXL2, ADAMTS2 |
| GOTERM_BP_DIRECT | GO:0030574~collagen catabolic process | 18 | 1.41E-05 | COL4A2, COL4A1, COL3A1, MMP19, MRC2, COL15A1, COL2A1, CTSS, COL5A3, COL5A2, COL5A1, CTSL, COL6A6, COL6A3, COL1A2, COL6A1, COL1A1, ADAMTS2 |
| GOTERM_BP_DIRECT | GO:0006955~immune response | 62 | 1.77E-05 | PXDN, CHIA, TLR1, TLR2, TNFSF13, HLA-DMB, HLA-DMA, CXCL12, C1QC, IL10, MBP, IL4R, SEMA7A, C5AR1, CMKLR1, NCF4, PRG2, TNFRSF14, CTSS, WAS, LILRB2, TNFRSF9, CD86, CTSC, HLA-DPA1, TNFSF12-TNFSF13, LCP2, HLA-DRA, HLA-DQB1, TNFRSF21, CSF2, CCL2, LST1, HLA-DRB1, CCR1, GPR65, TNFRSF8, CCL8, CD70, PF4, IL32, CCL4, TNFRSF1B, IL17B, XBP1, FCGR1B, HLA-DPB1, HLA-DOA, THBS1, FYB, SECTM1, IL6, IL7, SAMHD1, CCL18, TNFSF8, RGS1, FCGR2B, TENM1, IRF8, CNIH1, BMP6 |
| GOTERM_BP_DIRECT | GO:0070374~positive regulation of ERK1 and ERK2 cascade | 33 | 2.12E-05 | FGFR2, CCL2, ERBB4, CCR1, NPNT, TIRAP, PTPN22, CCL8, CCL4, MIF, GLIPR2, FBXW7, CD44, FGB, SEMA7A, CCL3L3, TEK, PYCARD, GPNMB, CSF1R, HAVCR2, PRKCA, IL6, C5AR1, CHI3L1, FGF23, PRKCDBP, LGALS9, CCL18, ARRB2, PLA2G2A, XCL1, HTR2A |
| GOTERM_BP_DIRECT | GO:0007160~cell-matrix adhesion | 21 | 4.45E-05 | PARVG, NPNT, COL3A1, ITGA10, ITGB2, NID2, COL5A3, CD63, VCAM1, SIGLEC1, LYVE1, CD44, TSC1, SORBS1, FGB, ITGB8, TIAM1, HPSE, ADAMTS12, JAM3, THBS3 |
| GOTERM_BP_DIRECT | GO:0050900~leukocyte migration | 24 | 1.84E-04 | C3AR1, C5AR1, ATP1B3, LYN, GRB2, FPR3, L1CAM, ITGB2, ITGAM, SLC7A7, MIF, CD48, CD84, DOK2, CD44, PROCR, TEK, COL1A2, CD2, FCER1G, COL1A1, JAM2, JAM3, SELPLG |
| GOTERM_BP_DIRECT | GO:0006935~chemotaxis | 24 | 1.84E-04 | C3AR1, PLP2, CCL2, C5AR1, CMKLR1, CCR1, CCL8, L1CAM, CXCL12, LGALS9, CCL18, PLAUR, LSP1, MAPK1, DOCK2, S1PR1, RAC2, CXCR4, CXCL16, CMTM7, ANOS1, CMTM3, PLAU, CMTM6 |
| GOTERM_BP_DIRECT | GO:0031666~positive regulation of lipopolysaccharide-mediated signaling pathway | 6 | 1.86E-04 | PRKCA, LY96, LY86, CD180, BMP6, MIF |
| GOTERM_BP_DIRECT | GO:0019886~antigen processing and presentation of exogenous peptide antigen via MHC class II | 20 | 1.92E-04 | DYNC1I1, HLA-DQB1, CLTA, HLA-DRB1, LGMN, IFI30, CTSS, HLA-DMB, RACGAP1, HLA-DMA, KIF3C, CTSL, DYNLL1, FCER1G, HLA-DPA1, HLA-DPB1, HLA-DOA, KIF26A, KIF2A, HLA-DRA |
| GOTERM_BP_DIRECT | GO:0060333~interferon-gamma-mediated signaling pathway | 17 | 2.11E-04 | HLA-DQB1, HLA-DRB1, HCK, CAMK2G, IFI30, VCAM1, NCAM1, TRIM5, CD44, IRF5, IRF7, FCGR1B, IRF8, JAK2, HLA-DPA1, HLA-DPB1, HLA-DRA |
| GOTERM_BP_DIRECT | GO:0006928~movement of cell or subcellular component | 19 | 2.35E-04 | IGF1, FPR3, ARPC5, CERCAM, CCL4, ELMO1, PLAUR, ACTR3, LSP1, ARPC1B, DNALI1, CORO1A, LYVE1, ARPC3, SPINT2, VNN1, ANOS1, JAK2, AKAP4 |
| GOTERM_BP_DIRECT | GO:0002504~antigen processing and presentation of peptide or polysaccharide antigen via MHC class II | 8 | 2.64E-04 | HLA-DQB1, HLA-DRB1, HLA-DPA1, HLA-DPB1, HLA-DMB, HLA-DOA, HLA-DMA, HLA-DRA |
| GOTERM_BP_DIRECT | GO:0018279~protein N-linked glycosylation via asparagine | 12 | 3.30E-04 | MGAT2, OSTC, TUSC3, ST6GAL2, FUT8, ST3GAL5, ST3GAL6, ALG5, RPN2, DDOST, UGGT1, ST6GALNAC2 |
| GOTERM_BP_DIRECT | GO:0060670~branching involved in labyrinthine layer morphogenesis | 6 | 3.90E-04 | FGFR2, SOCS3, GRB2, RSPO3, SPINT1, IL10 |
| GOTERM_BP_DIRECT | GO:0034142~toll-like receptor 4 signaling pathway | 8 | 4.01E-04 | LY96, TIRAP, PIK3AP1, ITGB2, TRIL, ITGAM, CD14, LGALS9 |
| GOTERM_BP_DIRECT | GO:0001525~angiogenesis | 35 | 4.80E-04 | FGFR2, SAT1, EMCN, HTATIP2, CCL2, CYP1B1, MYDGF, CSPG4, ELK3, EPHB3, NRCAM, TSPAN12, S1PR1, XBP1, FAP, TGFBI, TEK, ROBO4, VEZF1, SYK, PRKCA, PIK3CG, COL4A2, MMP19, COL15A1, HSPG2, MFGE8, ECM1, THY1, HIF1A, PLXDC1, ADM2, TNFSF12-TNFSF13, JAM3, TNFAIP2 |
| GOTERM_BP_DIRECT | GO:0051301~cell division | 49 | 4.89E-04 | CLTA, USP9X, CETN2, PTTG1, LLGL2, HMCN1, KATNA1, CCNY, CDC123, CLASP2, TUBA1A, CCNA1, TUBA1B, CCNA2, TUBA1C, CDCA4, CDCA3, KIF2A, KIF14, CDC7, CDK1, CDC6, CKAP5, PSRC1, TPX2, CENPF, CDC23, CDC20, BIRC5, DYNLT1, UBE2C, MCM5, MIS12, WEE1, CDC25B, CCNB1, MAD2L1, RCC2, CCND2, ZWINT, KIF20B, CENPW, BUB1B, MAPRE2, FBXL7, HAUS8, SMC1A, CHFR, UBE2S |
| GOTERM_BP_DIRECT | GO:0002250~adaptive immune response | 26 | 5.71E-04 | TNFRSF21, BTK, ALCAM, TNFRSF11A, FGB, FCGR1B, CLEC4A, PAG1, SYK, HAVCR2, PIK3CG, LAIR1, BCL10, LYN, CTSS, PRKCB, BTLA, CD84, CTSL, LILRB2, CD86, LILRB5, TSC1, JAK2, PRDM1, JAM3 |
| GOTERM_BP_DIRECT | GO:0006915~apoptotic process | 71 | 6.65E-04 | IER3, HTATIP2, CHIA, LY86, TLR2, PAK6, TMEM173, MYD88, DYNLL1, CXCR4, TIAM1, CASP7, MAP3K9, RALB, DAP, UNC5C, RNF34, DHCR24, CDK1, BCL10, C5AR1, ARHGEF6, CST3, TPX2, PIM1, PRKCB, ELMO1, EPB41L3, TNFRSF9, MAPK1, TNFAIP8, BUB1B, CTSC, TNFSF12-TNFSF13, GADD45B, TNFAIP3, GADD45A, NEK6, FAIM2, MELK, FGFR2, TNFRSF21, UBE2Z, MYDGF, STK17B, GPR65, ITGB2, GREM1, PLAGL1, PEG10, DOCK1, CD2, PYCARD, FAM32A, BMF, TRAF4, PHLDA1, CFLAR, ACTC1, CHI3L1, GAS2, MAL, BIRC5, TNFSF8, RASSF5, DRAM2, RPS6KA1, CSRNP1, JAK2, GRK5, CD14 |
| GOTERM_BP_DIRECT | GO:0097190~apoptotic signaling pathway | 16 | 6.85E-04 | PRKCA, TNFRSF21, SGPL1, LY96, TNFRSF8, TNFRSF14, BTK, P2RX4, CD38, P2RX7, MAP3K5, TNFRSF1B, TNFRSF11A, DAP, TNFSF12-TNFSF13, CD14 |
| GOTERM_BP_DIRECT | GO:0001649~osteoblast differentiation | 20 | 9.62E-04 | RRBP1, TNC, MRC2, FHL2, LRRC17, SNAI2, WWTR1, SOX8, JUNB, PENK, SEMA7A, RPS15, CREB3L1, COL6A1, COL1A1, TMEM119, GPNMB, CHRD, SPP1, BMP6 |
| GOTERM_BP_DIRECT | GO:0045087~innate immune response | 56 | 0.001085893 | ELF4, LY86, TLR1, TIRAP, TLR2, APOBEC3G, TLR5, C1QC, TLR8, BTK, APOBEC3B, MARCO, TRIM5, TMEM173, MAP3K5, MYD88, CLEC4A, VNN1, CFI, SYK, PIK3CG, BCL10, LYN, BST2, NCF2, LY96, CAMP, ANKHD1-EIF4EBP3, COLEC12, SRPK1, CD84, C1QA, C1QB, PRDM1, HMGB3, C4B_2, TRIM14, MIF, SERINC5, FGB, PYCARD, FCER1G, TYROBP, CSF1R, HAVCR2, CR1, LGALS3, TRIL, CD180, CORO1A, CYBB, IRF7, JAK2, CLEC7A, CD14, DMBT1 |
| GOTERM_BP_DIRECT | GO:0016064~immunoglobulin mediated immune response | 6 | 0.00124064 | BCL10, MYD88, IL4R, IRF7, FCER1G, TLR8 |
| GOTERM_BP_DIRECT | GO:0045766~positive regulation of angiogenesis | 21 | 0.001351538 | PRKCA, C3AR1, CYP1B1, C5AR1, MYDGF, CAMP, CHI3L1, ITGB2, GREM1, ECM1, VASH2, ANXA3, PRKCB, SEMA5A, CYBB, HIF1A, XBP1, TEK, ADM2, TNFSF12-TNFSF13, THBS1 |
| GOTERM_BP_DIRECT | GO:0008360~regulation of cell shape | 24 | 0.001369791 | CDC7, FGD2, RHOJ, DMTN, TBCCD1, IL6, CCL2, PALM2-AKAP2, LST1, CSNK1G1, DIAPH1, HCK, ARHGEF18, ITGB2, GAS2, LPAR1, S100A13, EPB41L3, CORO1A, EZR, PALM2, WIPF3, WIPF1, CSF1R |
| GOTERM_BP_DIRECT | GO:0032760~positive regulation of tumor necrosis factor production | 12 | 0.001441931 | CCL2, MYD88, LY96, TIRAP, CD2, PYCARD, TLR2, FCER1G, PF4, JAK2, CD14, SASH3 |
| GOTERM_BP_DIRECT | GO:0030048~actin filament-based movement | 7 | 0.00190135 | ACTC1, MYO1B, MYH3, MYO1E, WIPF3, WIPF1, WAS |
| GOTERM_BP_DIRECT | GO:0000083~regulation of transcription involved in G1/S transition of mitotic cell cycle | 8 | 0.002128442 | CDK1, CDC6, TYMS, E2F6, RRM2, PCNA, HINFP, CCNA1 |
| GOTERM_BP_DIRECT | GO:0043066~negative regulation of apoptotic process | 57 | 0.002373644 | IER3, HTATIP2, AIF1, ARNT2, CBX4, IL10, MYD88, CD44, PAX7, CHST11, RGN, FAM129B, DHCR24, KIF14, CDK1, EGR3, SOCS3, PIM1, PLAUR, MAP4K4, CD38, MSX1, MAD2L1, CCND2, TNFAIP8, FAIM2, GCLC, LIMS2, ERBB4, MYDGF, UNG, FHL2, PPT1, GREM1, SOX8, TIMP1, MIF, XBP1, TEK, HSPA5, THBS1, CSF1R, CFLAR, IL6, ACTC1, LTK, IL7, HCK, IGF1, BIRC5, PLAC8, CDKN1A, RPS6KA1, PLK2, UCP2, USP47, GRK5 |
| GOTERM_BP_DIRECT | GO:0046777~protein autophosphorylation | 27 | 0.002374473 | STK16, FGFR2, STK33, LYN, ERBB4, STK24, MEX3B, STK10, HCK, CAMK2G, STK26, WNK1, STK17B, PIM1, TTK, EPHB3, THY1, MAP3K9, TEK, ERN1, JAK2, GRK5, DCX, NEK6, MELK, SYK, CSF1R |
| GOTERM_BP_DIRECT | GO:0001503~ossification | 16 | 0.002436298 | MINPP1, OSTF1, MYF5, LRRC17, GPM6B, SPARC, ECM1, COL5A2, IGSF10, TNFRSF11A, KAZALD1, RASSF2, TMEM119, EXT2, RUNX3, SPP1 |
| GOTERM_BP_DIRECT | GO:0030335~positive regulation of cell migration | 28 | 0.003042719 | WNT5B, DIAPH1, AIF1, CCR1, SEMA5A, S1PR1, XBP1, TIAM1, SEMA7A, HSPA5, THBS1, GPNMB, LAMB1, CSF1R, PRKCA, F10, LYN, IGF1, SNAI2, MAPK1, CORO1A, SEMA6D, PTP4A1, CXCL16, JAK2, COL1A1, PLAU, ATP8A1 |
| GOTERM_BP_DIRECT | GO:0030168~platelet activation | 20 | 0.00321843 | PRKCA, RAP2B, PIK3CG, GNA14, GNA15, IL6, LYN, COL3A1, PF4, PRKCB, MAPK1, RAC2, ARRB2, FGB, COL1A2, FCER1G, PIK3R5, COL1A1, SYK, LCP2 |
| GOTERM_BP_DIRECT | GO:0009311~oligosaccharide metabolic process | 8 | 0.00359819 | MGAT2, GAL3ST4, ST6GAL2, ST3GAL5, ST3GAL6, MAN1B1, ST8SIA3, ST6GALNAC2 |
| GOTERM_BP_DIRECT | GO:0031663~lipopolysaccharide-mediated signaling pathway | 9 | 0.00408336 | MAPK1, CCL2, MYD88, LYN, LY96, HCK, TLR2, PTPN22, CD14 |
| GOTERM_BP_DIRECT | GO:0006487~protein N-linked glycosylation | 10 | 0.004233959 | MGAT2, TUSC3, FUT8, FUT11, ENTPD5, ALG5, RPN2, ALG8, MAN1C1, DDOST |
| GOTERM_BP_DIRECT | GO:0016337~single organismal cell-cell adhesion | 18 | 0.004247424 | C10ORF54, EMCN, LIMS2, CEP41, THY1, VCAM1, NRCAM, SIGLEC1, COL14A1, CD44, PKP1, CD93, PKP2, CD2, VNN1, VMP1, DLG5, JAM2 |
| GOTERM_BP_DIRECT | GO:0045821~positive regulation of glycolytic process | 6 | 0.004343469 | P2RX7, HIF1A, MLXIPL, ENTPD5, IGF1, HTR2A |
| GOTERM_BP_DIRECT | GO:0006027~glycosaminoglycan catabolic process | 8 | 0.004572752 | GPC4, GNS, LYVE1, HPSE, GUSB, HSPG2, HYAL4, FUCA1 |
| GOTERM_BP_DIRECT | GO:0000082~G1/S transition of mitotic cell cycle | 18 | 0.004708596 | CDC7, BCAT1, PPP6C, CDC6, CDK1, CACUL1, CAMK2G, SKP2, GPR132, MCM5, MCM6, TYMS, CDKN1A, PLK2, RRM2, HINFP, PCNA, CCNA1 |
| GOTERM_BP_DIRECT | GO:0031100~organ regeneration | 11 | 0.004903292 | CDK1, CDKN1A, CCL2, C5AR1, NR0B2, CXCL12, CCNA2, PRPS2, LCP1, ANXA3, NNMT |
| GOTERM_BP_DIRECT | GO:0002755~MyD88-dependent toll-like receptor signaling pathway | 9 | 0.005000792 | MYD88, LY96, TLR1, TIRAP, TLR2, TLR5, CD14, TLR8, BTK |
| GOTERM_BP_DIRECT | GO:0001501~skeletal system development | 22 | 0.005030933 | SH3PXD2B, HAPLN2, WFIKKN2, EVC, HAPLN3, CMKLR1, SOX11, COL3A1, IGF1, SOX4, COL2A1, PKDCC, NPR3, FRZB, COL5A2, VDR, RASSF2, COL1A2, COL1A1, CHRD, BMP6, SERP1 |
| GOTERM_BP_DIRECT | GO:0002503~peptide antigen assembly with MHC class II protein complex | 4 | 0.005180396 | HLA-DRB1, HLA-DMB, HLA-DMA, HLA-DRA |
| GOTERM_BP_DIRECT | GO:0043547~positive regulation of GTPase activity | 66 | 0.005583719 | ARHGAP19, TBC1D19, SMAP2, S1PR1, GRIN2D, CCL3L3, RABGEF1, RGN, CSF2RB, FRS2, ERRFI1, SHC2, CSF2RA, ARHGAP9, ARHGEF3, DEPDC7, RSU1, ARHGEF6, ARHGEF18, FGF23, ARHGEF9, THY1, ELMO1, ARHGAP30, NCAM1, GAPVD1, ARHGAP33, SBF1, SRGAP1, RIN3, FGD2, FGFR2, SNX18, CSF2, CCL2, ERBB4, AGFG1, GRB2, ERBB3, CAMK2G, CYTH4, CCL8, CCL4, LLGL1, LLGL2, DOCK2, DOCK1, TEK, SERGEF, RGS19, ARHGAP45, RGS18, DOCK8, RACGAP1, CCL18, FZD10, RGS1, ADAP2, CHN1, RGS7, GFRA1, JAK2, GFRA4, XCL1, IL3RA, BCAR3 |
| GOTERM_BP_DIRECT | GO:0007568~aging | 25 | 0.005602977 | IL6, CCL2, GCLC, GRB2, COL3A1, CNP, ITGB2, IL10, TIMP1, KRTAP4-9, VCAM1, TYMS, TNFRSF1B, CD86, PENK, SERPINF1, UCP2, DMD, CASP7, CNR1, RGN, CTSC, RPN2, LOXL2, HTR2A |
| GOTERM_BP_DIRECT | GO:0002224~toll-like receptor signaling pathway | 8 | 0.00573374 | CTSL, BCL10, MYD88, LGMN, TLR1, CTSS, TLR8, CD180 |
| GOTERM_BP_DIRECT | GO:0007169~transmembrane receptor protein tyrosine kinase signaling pathway | 17 | 0.00599956 | LTK, LYN, ERBB4, ERBB3, HCK, CSPG4, BTK, DOK2, TEK, ROR1, ANGPTL1, SHC2, PAG1, SYK, LCP2, BLNK, CSF1R |
| GOTERM_BP_DIRECT | GO:0008631~intrinsic apoptotic signaling pathway in response to oxidative stress | 6 | 0.006070194 | ZNF622, MAP3K5, CYP1B1, STK24, JAK2, MELK |
| GOTERM_BP_DIRECT | GO:0030502~negative regulation of bone mineralization | 6 | 0.006070194 | HIF1A, CCR1, FGF23, GREM1, ECM1, SRGN |
| GOTERM_BP_DIRECT | GO:0008284~positive regulation of cell proliferation | 56 | 0.006189679 | PRC1, OSMR, MARCKSL1, ARNT2, TTK, TNFSF13, TNFRSF11A, TIAM1, KIF14, CDC7, LYN, SLC25A5, CAMP, SOX11, MLXIPL, CST3, MAPK1, CD86, CCND2, FGFR2, CSF2, DRD3, ERBB4, CACUL1, TNC, CRLF1, ST8SIA1, SOX4, GREM1, TIMP1, FOLR2, RAC2, XBP1, CDC123, THBS1, CSF1R, IL6, NACC2, IL7, TBX2, HCK, HCLS1, IGF1, BIRC5, CDC20, WWTR1, TET1, S100A13, CLEC11A, PLAC8, CDC25B, BNC1, KIF20B, PBX1, GRK5, HTR2A |
| GOTERM_BP_DIRECT | GO:0033160~positive regulation of protein import into nucleus, translocation | 5 | 0.006864089 | CDK1, TMEM173, IL6, IGF1, JAK2 |
| GOTERM_BP_DIRECT | GO:0002548~monocyte chemotaxis | 10 | 0.007099112 | IL6, TNFRSF11A, CCL2, LGALS3, FOLR2, CCL3L3, CCL8, XCL1, CCL4, CCL18 |
| GOTERM_BP_DIRECT | GO:0034314~Arp2/3 complex-mediated actin nucleation | 7 | 0.007972282 | ACTR3, ARPC1B, MAGEL2, ARPC3, ACTR3B, IQGAP2, ARPC5 |
| GOTERM_BP_DIRECT | GO:0030593~neutrophil chemotaxis | 13 | 0.008169352 | PIK3CG, CCL2, C5AR1, LGALS3, CCL3L3, CKLF, CCL8, FCER1G, ITGB2, XCL1, CCL4, CCL18, SYK |
| GOTERM_BP_DIRECT | GO:0006952~defense response | 13 | 0.009212271 | RNASE6, CST3, COLEC12, IL32, CXCL12, WAS, CLEC1A, CD84, CD48, CD83, KCNN4, LILRB5, HCP5 |
| GOTERM_BP_DIRECT | GO:0007067~mitotic nuclear division | 33 | 0.009668096 | SNX18, CLTA, USP9X, CETN2, ANLN, PTTG1, CEP55, KATNA1, CCNA1, CCNA2, CDCA3, CDK1, CDC6, CKAP5, TPX2, CENPF, CDC23, BIRC5, DYNLT1, CDC20, PBK, WEE1, MIS12, CDC25B, RCC2, KIF20B, CENPW, BUB1B, FBXL7, MAPRE2, HAUS8, CHFR, NEK6 |
| GOTERM_BP_DIRECT | GO:0032494~response to peptidoglycan | 4 | 0.009715838 | IL6, MYD88, C5AR1, IRF5 |
| GOTERM_CC_DIRECT | GO:0070062~extracellular exosome | 343 | 3.07E-15 | S100A6, ATP1B3, TUBB2A, FAM20A, PDLIM2, CCT2, CD53, C1QC, CD48, OGN, NPAP1, HMCN1, CD44, APOE, PLOD3, H2AFZ, RPL26L1, AIF1L, VNN1, CFI, RAB21, FTL, PI15, PTPRJ, MYH3, PTBP1, COLEC12, PLAUR, THY1, C1QA, CD38, MAPK1, C1QB, RPS18, NPC2, SERPINF1, NME1, CD33, PLA2G2A, RAB15, LAMC1, VSIG4, EXT2, HLA-DRA, TPST2, TPPP3, OSTF1, HLA-DRB1, DAG1, ACP5, CD70, PPT1, DAAM2, SEMA5A, ALCAM, P3H1, SERINC5, PROCR, RAC2, GALNS, FGL2, LAMB1, SPP1, CNKSR2, BHMT2, HPCAL1, S100A16, LGALS3, GUSB, S100A11, CHI3L1, KRT31, HBA2, CD63, ECM1, LGALS9, S100A13, LAMA4, GGT6, COL14A1, PKP1, CD300A, HEBP2, PCNA, PARP4, PDZK1, PLAU, PXDN, PZP, SLC15A2, MARCKSL1, NPNT, UFC1, ACTR3, MTHFD1, FAM168B, CFHR1, DYNLL1, SMPDL3A, CCNY, CREG1, SERPINA3, CHST14, TUBB6, FAM129B, SLC22A5, TUBB1, GOLM1, RAP2B, MINPP1, LYN, SLC25A5, ARHGEF18, CAMP, PRG2, LYZ, SPEN, CLIC1, WAS, C1QTNF9B, BGN, PTGDS, CLIC6, SLC26A9, SERPINB1, CLN5, BID, FUT8, HIST1H2AE, HPRT1, ITM2C, PFAS, PCOLCE, MIF, GLIPR2, SFT2D2, CBR1, EZR, CRISPLD1, FAT4, RNASET2, COL6A3, COL6A1, PPP3CC, THBS1, MAGEF1, BCAS1, CES2, ACTC1, CAPN5, BAIAP2L1, HSPG2, COL15A1, ATP1A1, NPR3, NID2, MXRA5, LSP1, PROM1, YWHAG, RPL22, PTP4A1, BLVRB, CAPG, FBLN7, GFRA1, ATP5A1, FCGR2A, GFRA4, CD14, CMTM6, GNA14, ALDH1L1, PLXNA1, THRB, CNDP2, CTDSPL, ATP6AP2, LGMN, CHMP4A, HBS1L, CSPG4, SNRPD2, IQGAP2, TNFSF13, BPHL, CNP, CXCL12, FAM49B, SLC2A4, ARL15, ST3GAL6, TGFBI, ROBO4, RALB, ENOPH1, BST2, STK24, NCALD, FUT11, ERP29, STK26, CST3, MFGE8, PATJ, TCN2, NCAM1, GNS, ARPC1B, PDDC1, VAMP8, AKR1B10, COL1A2, STMN1, TNFAIP3, UGGT1, PRPS2, MVP, FAM171A1, GAL3ST4, WNT5B, GRB2, ACTR3B, MRAS, STK10, APOC1, ITGB2, CTSA, ARPC5, EXTL2, ITGAM, TIMP1, TTYH3, DOCK2, REG1B, ARPC3, HIST1H4A, ITGB8, FGB, SYAP1, ENTPD5, GALC, GALE, ANGPTL1, HIST1H4J, MEST, HIST1H4H, HAVCR2, EEF1A1, MYO1B, MYO1E, CKAP4, FSCN1, ABCB4, P2RX4, CORO1A, LYVE1, TXNDC17, PPIB, PPIC, ARMC9, ALDH2, MYH11, SLC13A3, ANTXR1, FABP5, RHOJ, GM2A, SORL1, HLA-DMA, GPC4, SLC1A4, TP53I3, CRYL1, ACOT7, CXCR4, TPP1, HIST3H2A, TUBA1A, MAN2B1, CYS1, TUBA1B, PRKCA, CDK1, LAIR1, RSU1, SPINT1, WLS, PRKCB, CD84, CTSL, ATP6V1A, CD86, GRN, ZNF711, CTSC, CA2, CA1, LCP1, SNX18, GALNT7, FKBP5, C4B_2, MYDGF, HBM, RNH1, TNFRSF8, PLVAP, PLPP1, VCAM1, C1QTNF3, AKR1A1, ALDH1A3, HS6ST2, CALML5, HSPA5, GSTO1, MYOF, ENO1, PTPRC, PLP2, SECTM1, COL4A2, CR1, LIPA, GMDS, RNASE6, TMED9, COL5A3, COTL1, RACGAP1, MAN1C1, FUCA1, CPVL, COL5A1, ANXA3, XPNPEP1, A1BG, KRT77, DSC2, METRNL, ATP8A1, DMBT1 |
| GOTERM_CC_DIRECT | GO:0005581~collagen trimer | 29 | 6.25E-10 | CTHRC1, MSR1, COL3A1, COL2A1, C1QC, PCOLCE, TIMP1, MARCO, C1QTNF3, COL6A6, P4HA1, COL6A3, C1QTNF2, FCN1, COL6A1, LOX, COL15A1, COLEC12, EMILIN2, COL5A2, COL5A1, C1QA, C1QTNF9B, C1QB, RPS18, COL14A1, COL1A2, COL1A1, COL20A1 |
| GOTERM_CC_DIRECT | GO:0005788~endoplasmic reticulum lumen | 43 | 3.70E-09 | WNT5B, ADAMTSL1, MYDGF, COL3A1, COL2A1, PDIA4, P3H1, KDELC1, P4HA1, BCHE, FMO1, RNASET2, COL6A3, COL6A1, GPX8, HSPA5, GPX7, THBS1, SPON1, MINPP1, CES2, COL4A2, F10, COL4A1, ERP29, COL15A1, CERCAM, COL5A3, COL5A2, COL5A1, PLAUR, TOR2A, TXNDC12, COL14A1, PPIB, TMEM43, COL1A2, CTSC, COL1A1, RCN3, UGGT1, COL20A1, RCN1 |
| GOTERM_CC_DIRECT | GO:0031012~extracellular matrix | 53 | 1.43E-07 | ASPN, PXDN, CCT2, OGN, HMCN1, SERPINE2, CD93, APOE, TGFBI, LOXL2, SPON1, SLC25A5, MMP19, MFGE8, ADAMTS9, RPS18, BGN, SERPINF1, COL1A2, COL1A1, LAMC1, FGFR2, TNC, COL3A1, COL2A1, PCOLCE, HIST1H4A, COL6A3, COL6A1, HSPA5, ADAMTS12, THBS1, LAMB1, HIST1H4J, HIST1H4H, FGFBP3, COL4A2, COL4A1, LGALS3, CKAP4, COL15A1, HSPG2, NID2, EMILIN2, ECM1, COL5A2, COL5A1, LAMA4, COL14A1, RPL22, CDON, ATP5A1, COL20A1 |
| GOTERM_CC_DIRECT | GO:0005615~extracellular space | 165 | 1.56E-07 | RETNLB, CTHRC1, CHIA, CNP, TNFSF13, C1QC, CXCL12, IL10, OGN, SERPINE2, SPX, APOE, ATXN10, FAP, SEMA7A, TGFBI, CPA3, LGI4, CFI, LOX, LGI1, MTUS1, SPON1, RNLS, CST3, CECR1, FGF23, MFGE8, TCN2, TIMM8B, LILRB2, CBLN4, RALGAPA2, ADAMTS9, SERPINF1, SCGB1D2, COL1A2, PLA2G2A, ANOS1, BIVM, COL1A1, LAMC1, TNFAIP2, WNT5B, CCL2, ERBB3, DAG1, CCL8, CD70, PPT1, IL32, GREM1, CCL4, ITGAM, TIMP1, MOV10, IL17B, FGB, CKLF, SFTPC, ANGPTL1, LAMB1, SRGN, SPP1, DAND5, EEF1A1, LGALS3, GUSB, S100A11, CHI3L1, KRT31, CD63, OPRPN, ECM1, LGALS9, S100A13, COL14A1, CXCL16, FJX1, XCL1, CHRD, COL20A1, PLAU, BMP6, PXDN, LY86, SORL1, LRRC17, CFHR1, GPC4, MTHFD2, SMPDL3A, IL4R, CCL3L3, CREG1, SERPINA3, MAN2B1, LOXL2, GOLM1, LY96, CAMP, LYZ, SPINT1, CLIC1, CTSS, UBN2, GAL, TNFRSF9, CTSL, PTGDS, GRN, PLXDC1, CPXM1, SERPINB1, CTSC, CA2, TNFSF12-TNFSF13, JAM3, LCP1, CSF2, MYDGF, C4B_2, TNC, CRLF1, COL3A1, ADAMTS15, PF4, COL2A1, PCOLCE, MIF, VCAM1, EZR, C1QTNF3, AKR1A1, RNASET2, C1QTNF2, COL6A3, THBS1, ENO1, FLRT3, SECTM1, IL6, CES2, ACTC1, HAPLN3, IL7, HSPG2, COL15A1, IGF1, SPARC, FRZB, CLEC11A, CCL18, TNFSF8, PROM1, A1BG, TSLP, CMTM7, METRNL, ALOX5, GFRA4, CMTM3, CD14, CMTM6, DMBT1 |
| GOTERM_CC_DIRECT | GO:0043202~lysosomal lumen | 22 | 3.83E-06 | GM2A, GUSB, LGMN, HSPG2, CSPG4, IFI30, CTSA, PPT1, CTSS, TCN2, FUCA1, GNS, GPC4, CTSL, OGN, BGN, HPSE, TPP1, RNASET2, GALNS, GALC, MAN2B1 |
| GOTERM_CC_DIRECT | GO:0005604~basement membrane | 21 | 4.32E-06 | COL4A1, NPNT, TNC, CCDC80, NTN4, CST3, DAG1, HSPG2, COL2A1, SPARC, NID2, COL5A1, TIMP1, LAMA4, HMCN1, SERPINF1, SMOC1, TGFBI, LAMC1, LOXL2, LAMB1 |
| GOTERM_CC_DIRECT | GO:0005887~integral component of plasma membrane | 164 | 4.88E-06 | TUSC3, PLXNA1, AQP8, TLR1, ATP1B4, CSPG4, TLR2, PLPPR4, CD52, CD53, TLR5, LPAR1, TSPAN9, PLPPR1, ZNRF3, AQP3, SLC7A7, CD48, MARCO, NRCAM, CD44, SLC2A4, ST3GAL5, CLEC4A, SLCO1C1, MCOLN1, FRS2, PAG1, PTPRJ, C5AR1, KCND2, BST2, SLC22A23, TNFRSF14, CNGA1, PLAUR, THY1, LILRB2, CD33, PI4K2A, ROR1, HLA-DPA1, EFNA4, HS3ST3B1, HLA-DRA, FGFR2, C3AR1, KCNMB4, SLC38A3, SLC2A10, HLA-DRB1, DRD3, ERBB3, SLC38A6, KCNA1, NINJ2, PTK7, CD70, CD72, FXYD5, EPHB3, ALCAM, P2RY8, LAPTM5, PROCR, CD69, TRO, CNR1, TEK, FCER1G, EMB, SLC31A2, CSF1R, TYROBP, MRC1, TRPC4, MRC2, GPR137B, CD300C, CD63, SLCO2B1, ABCB4, P2RX4, P2RX7, LYVE1, ATP13A1, GPR34, SEMA6D, SLC7A1, MILR1, SLC13A3, CD200, CLCN4, GJA8, IGDCC3, MSR1, SLC15A2, TRPV2, SORL1, SLC1A4, GPC4, TSPAN12, TNFRSF11A, IL4R, SLC22A4, CSF2RB, EVI2B, SLC22A5, CSF2RA, SLC43A2, GOLM1, SLC25A5, PCDHB6, CMKLR1, PCDHB2, PCDH7, CD163, CD84, CLEC1A, TNFRSF9, ATP6V1A, CD83, BSND, CHRM3, SLC26A9, TNFSF12-TNFSF13, JAM2, DEGS1, CALCR, PLPP5, TNFRSF21, CCR1, PCDHB15, GPR65, TNFRSF8, FPR3, PLPP1, APLNR, TNFRSF1B, CD2, GPR101, GPNMB, SELPLG, DCLK1, FLRT3, PTPRC, CR1, LTK, CD99, MAL, NPR3, CD180, TNFSF8, PROM1, TENM4, FZD10, CYBB, TENM1, STAB1, CDON, SLC18A2, MPL, FAM26F, HTR2A |
| GOTERM_CC_DIRECT | GO:0045121~membrane raft | 38 | 5.15E-06 | TLR1, TLR2, DAG1, HK1, GPM6B, PPT1, BTK, CD48, EFHD2, TNFRSF1B, S1PR1, MARVELD1, SLC2A4, SORBS1, HPSE, DMD, CNR1, TEK, SYNJ2, KCNQ1, PAG1, KCNE3, RAP2B, BCL10, PTPRC, CFLAR, BST2, LYN, ARID3A, RGS19, MAL, ABCB4, THY1, PI4K2A, JAK2, PDZK1, FAIM2, CD14 |
| GOTERM_CC_DIRECT | GO:0009986~cell surface | 76 | 5.98E-06 | MICB, TRPV2, CSPG4, TLR2, IQGAP2, L1CAM, CD53, LPAR1, PDIA4, HLA-DMA, SLC1A4, SRPX, CD44, CD93, CXCR4, FAP, CHRNA1, PTPRJ, TMEM206, C10ORF54, C5AR1, BST2, ERP29, CEP41, HYAL4, HCST, NCAM1, LILRB2, CD38, ADAMTS9, CD86, BGN, BACE2, IGSF3, SLC26A9, HLA-DPA1, PTGFRN, ADGRA2, HLA-DRA, FGFR2, WNT5B, HLA-DRB1, ADAMTS15, KCNA1, PLVAP, ITGB2, GREM1, ITGAM, MIF, VCAM1, PROCR, FOLR2, ITGB8, FGB, DMD, TEK, CD2, FCER1G, HLA-DPB1, HSPA5, THBS1, TYROBP, CSF1R, MRC1, HAVCR2, PTPRC, CR1, TRPC4, CAPN5, SPARC, CD63, PROM1, FZD10, ANTXR1, MPL, PLAU |
| GOTERM_CC_DIRECT | GO:0005576~extracellular region | 180 | 1.44E-05 | CHIA, CSPG4, GFER, TNFSF13, C1QC, CXCL12, IL10, NRCAM, OLFML1, OGN, CRY2, SERPINE2, APOE, TGFBI, RGN, CPA3, LGI4, CFI, LOX, HTRA3, LGI1, PRLH, TMEFF2, F10, OLFML2B, CST3, CECR1, FGF23, MFGE8, TCN2, VASH2, WFDC13, C1QA, C1QB, SERPINF1, COL1A2, PLA2G2A, ANOS1, MFAP2, EFNA4, COL1A1, LAMC1, ADAMTS2, MST1L, FGFR2, ENPP5, EMCN, WNT5B, CCL2, ERBB4, APOC1, DAG1, IFI30, PPT1, CNPY4, EPHB3, MDK, CCL4, TIMP1, FAM19A5, SCGB1C2, C1ORF54, LAMB3, IL17B, PROCR, HIST1H4A, FOLR2, FGB, BCHE, TEK, CKLF, SFTPC, LAMB1, HIST1H4J, CDC37L1, SRGN, HIST1H4H, SPP1, ADAM28, DAND5, VSTM4, PRB1, NTN4, HBA2, EMILIN2, OPRPN, ECM1, LAMA4, COL14A1, PENK, CXCL16, ADM5, ADM2, XCL1, COL20A1, PLAU, BMP6, PZP, NPNT, SPINK4, CFHR2, SPINT2, RSPO3, AOAH, CCL3L3, SERPINA3, GPX7, CSF2RA, CD200R1, CAMP, MMP19, PRG2, SIGLEC10, LYZ, SPINT1, PKDCC, CTSS, GAL, CD163, KIAA0100, TOR2A, CTSL, SIGLEC1, BGN, PTGDS, PLXDC1, CHSY1, TNFSF12-TNFSF13, ADAM12, CSF2, WFIKKN2, C4B_2, TNC, CRLF1, COL3A1, PF4, COL2A1, MIF, NETO1, IGSF10, GLIPR2, TNFRSF1B, COL6A6, CRISPLD1, C12ORF49, RNASET2, FCN1, COL6A3, CD2, PYCARD, COL6A1, BPIFA4P, THBS1, THBS3, FGFBP3, IL6, COL4A2, COL4A1, PLEK, IL7, RNASE6, HSPG2, COL15A1, PDZD11, IGF1, SPARC, NID2, COL5A3, FRZB, LCN10, COL5A2, CLEC11A, COL5A1, A1BG, C4ORF48, TENM1, VSTM2L, CD14, MUC17, DMBT1 |
| GOTERM_CC_DIRECT | GO:0005874~microtubule | 48 | 3.64E-05 | TPPP3, TUBB2B, TUBB2A, DNAH3, IQGAP2, CNP, CCT2, WDR81, WHAMM, DNAH6, DNAI1, DYNLL1, KIF6, TIAM1, KATNA1, TUBB6, ODF2, CLASP2, TUBA1A, TUBB1, DCX, KIF21A, TUBA1B, MTUS1, TUBA1C, MTUS2, KIF2A, KIF14, GABARAPL3, DYNC1I1, GABARAPL1, TPX2, BIRC5, RACGAP1, KIF3C, EML2, WDR47, RASSF5, RCC2, TBCB, KIF20B, GAS2L1, MAP7, STMN1, HAUS8, KIF26A, NEK6, KIF20A |
| GOTERM_CC_DIRECT | GO:0005578~proteinaceous extracellular matrix | 43 | 3.96E-05 | ASPN, ADAMTS17, CTHRC1, PXDN, WNT5B, ADAMTSL1, ADAMTSL3, SPOCK2, NPNT, ADAMTS15, TIMP1, GPC4, P3H1, OGN, COL6A6, HPSE, SERAC1, SMOC1, TGFBI, COL6A3, LOX, ADAMTS12, SPON1, FLRT3, HAPLN2, HAPLN3, OLFML2B, MMP19, CHI3L1, COL15A1, OLFML2A, SPARC, EMILIN2, COL5A2, ECM1, COL5A1, ADAMTS9, COL14A1, BGN, COL1A2, FBLN7, ANOS1, ADAMTS2 |
| GOTERM_CC_DIRECT | GO:0005886~plasma membrane | 402 | 5.84E-05 | SLC9A7, OSMR, PLPPR4, L1CAM, BTK, DIRAS1, DIRAS3, GRIN2D, FAP, VNN1, SYK, PIK3CG, PTPRJ, COLEC12, SPIRE1, MARK1, PLAUR, THY1, RCC2, ROR1, HLA-DPA1, HLA-DRA, EMCN, ERBB4, HLA-DRB1, ERBB3, PROCR, RAC2, HLA-DPB1, HLA-DOA, CD300C, GAS1, PCDH17, ADAP2, RGS1, PKP1, PENK, PKP2, CD300A, RGS7, TMEM119, CD200, MSR1, MARCKSL1, TRPV2, FAM168B, DYNLL1, SLC22A4, SYNJ2, IGFLR1, PIK3AP1, SLC22A5, CD200R1, PARVG, RAP2B, LYN, CMKLR1, CLIC1, SRPK1, ELMO1, EPB41L3, PLXDC1, EPB41L5, CLIC6, TNFSF12-TNFSF13, ARL4D, ARL4C, HLA-DQB1, PCDHB15, GPR65, FPR3, GNG11, ITM2C, EZR, SORBS1, VMP1, KCNE5, KCNE3, ACSL6, PRSS12, FLRT3, ERVFRD-1, IGF1, LSP1, STAB1, GFRA1, ADGRL1, GFRA4, HTR2A, GNA14, MICB, GNA15, PRC1, RAB9B, OR1J2, ATP6AP2, TSPAN9, SLC7A7, NRCAM, MARCO, CHIC2, SLC2A4, TGFBI, LRRC52, RALB, SLCO1C1, UNC5C, FRS2, FLVCR2, MTUS1, BCL10, KCND3, TMEM204, KCND2, BST2, PATJ, CERCAM, HCST, NCAM1, ARRB2, VAMP8, PTGFRN, CCDC8, ME1, C3AR1, DRD3, MRAS, STK10, KCNA1, NKAIN2, AMER3, P2RY8, TTYH3, SLC48A1, FGB, TEK, TRAF4, MRC1, ADAM28, VSTM4, MYO1B, NTN4, BFSP1, BFSP2, SLCO2B1, SHANK2, CACNA2D4, ABCB4, NMT1, P2RX4, LYVE1, P2RX7, TSC1, SLC7A1, CXCL16, SLC13A3, RHOJ, MBP, GPC4, SLC1A4, SPRY1, FRMD6, SPINT2, CSF2RB, DLG5, CSF2RA, SLC43A2, NFX1, KIF14, TRPM3, SIGLEC10, SPINT1, PCDH7, SIGLEC1, ATP6V1A, CHRM3, STXBP6, MCC, CA2, JAM2, JAM3, LCP1, PLPP5, PLPP1, VCAM1, APLNR, CD2, HSPA5, GPNMB, SELPLG, PLP2, SECTM1, PLP1, SAMHD1, TMEM266, ANXA3, AJUBA, CYBB, DSC2, PLEKHN1, SLC36A1, ADORA3, ADCY7, ATP1B3, AQP8, CD53, LPAR1, AQP3, ZNRF3, CD48, MYD88, S1PR1, CD44, APOE, ATXN10, SEMA7A, CLEC4A, CHRNA1, F10, C5AR1, PIM1, GPR132, LILRB2, CD38, CD33, PLA2G2A, RAB15, EFNA4, ADGRA2, ENPP5, KCNMB4, SLC2A10, STK17B, DAG1, XK, IFI30, ITGA10, CD70, AFAP1L2, CD72, EPHB3, SEMA5A, SERINC5, DMD, FCER1G, EMB, GAD1, BLNK, TYROBP, CNKSR2, TRPC4, GPR157, S100A16, LGALS3, SMAD7, CD63, BTLA, ABCG5, SEMA6D, CLEC7A, GRK5, PDZK1, PLAU, SLC15A2, LY86, WBP4, TNFRSF11A, CCNY, FANCG, FAM129B, C10ORF54, LY96, PCDHB6, PCDHB2, CD163, BSND, SLC26A9, ADAM12, CLDN16, PARD3, LIMS2, CCR1, PPP6R3, GPM6B, DCHS1, FAT4, PLIN4, IL10RA, FCGR1B, ACTL6A, ETV5, FYB, BAIAP2L1, CBARP, HSPG2, ATP1A1, NPR3, PROM1, TENM4, FCGR2B, TENM1, CDON, BLVRB, SLC50A1, PTCH1, ATP5A1, FCGR2A, CD14, TUSC3, PLXNA1, CHMP4A, TLR1, TLR2, TIRAP, CNP, TLR5, UBQLN1, TIAM1, MCOLN1, RNF34, PAG1, TNFRSF14, CNGA1, RALGAPA2, IGSF3, ANOS1, EMP3, FGFR2, SLC38A3, WNT5B, SSH1, GRB2, SLC38A6, ITGB2, PAQR8, MRAP2, PAQR9, FXYD6, ITGAM, LLGL1, LLGL2, PPP1R16B, ITGB8, TRO, CNR1, CLASP2, BMF, CSF1R, CKAP4, CORO1A, DIO1, ANTXR1, IL3RA, DMTN, CLTA, PPIP5K1, EPS15L1, KCNQ4, TMEM173, CRYL1, CD93, PAK3, CXCR4, SHC2, KCNQ1, PRKCA, LAIR1, ADGRE2, NRXN2, CEP41, WLS, PRKCB, CD84, CD83, CD86, ARHGAP33, MELK, CALCR, TNFRSF21, C4B_2, CAMK2G, CYTH4, PCDHGC4, TNFRSF1B, MARVELD1, PALM2, PIK3R5, MYOF, SLC39A1, ENO1, PTPRC, CR1, LTK, PTPRE, CD99, RGS18, SPARC, KCNN4, TDP1, SLC18A2, MPL, ATP8A1 |
| GOTERM_CC_DIRECT | GO:0009897~external side of plasma membrane | 35 | 1.44E-04 | EMCN, HLA-DRB1, ATP6AP2, CCR1, ASTN1, CXCL12, CD48, NRCAM, VCAM1, ALCAM, GPC4, MAP3K5, TNFRSF11A, S1PR1, SLC2A4, CD69, FGB, SEMA7A, CD2, FCER1G, THBS1, CD200R1, PTPRC, IL6, MFGE8, TNFRSF14, THY1, NCAM1, TNFRSF9, CD83, P2RX7, CD86, CD33, ANTXR1, MUC17 |
| GOTERM_CC_DIRECT | GO:0005884~actin filament | 16 | 2.06E-04 | DMTN, ACTC1, MYO1B, AIF1, HCK, GAS2, CORO1A, EZR, RAC2, TSC1, TEK, AIF1L, WIPF3, BIN3, WIPF1, LCP1 |
| GOTERM_CC_DIRECT | GO:0005925~focal adhesion | 54 | 2.20E-04 | RPL18, CSPG4, PDLIM2, L1CAM, PDLIM1, TSPAN9, ACTR3, CD44, FAP, AIF1L, RAB21, PARVG, RSU1, LIMK1, PLAUR, THY1, MAPK1, ARPC1B, RPS18, EPB41L5, RPS15, LCP1, LIMS2, TNC, PTK7, DAG1, FHL2, ARPC5, SCARF2, ALCAM, EZR, RAC2, SORBS1, ARPC3, PROCR, TEK, HSPA5, CLASP2, AFAP1, FLRT3, PTPRC, ACTC1, CAPN5, HCK, MRC2, HSPG2, CD99, AJUBA, YWHAG, PPIB, RPL22, FBLN7, GRK5, PLAU |
| GOTERM_CC_DIRECT | GO:0032587~ruffle membrane | 18 | 3.18E-04 | FGD2, PTPRJ, EEF1A1, ADGRE2, PLEK, DIAPH1, AIF1, TIRAP, EZR, NME1, TIAM1, FAP, EPB41L5, AIF1L, PLA2G4F, PDE9A, CLASP2, LCP1 |
| GOTERM_CC_DIRECT | GO:0016020~membrane | 225 | 3.28E-04 | RPL18, PPP2R5A, STOML1, CD52, CD48, DIRAS1, MED28, ATXN10, APOE, SEMA7A, CREB3L1, ZNF106, CFI, FTL, PIK3CG, NCF4, PTBP1, UGCG, WNK1, MGAT2, LILRB2, CD38, RPS18, GAPVD1, RCC2, NME1, RPS15, EXT2, KCNMB4, TPST2, HLA-DRB1, DAG1, SFXN3, PPT1, SEMA5A, P3H1, RAC2, CKLF, HLA-DPB1, DCAKD, CNKSR2, HPCAL1, LGALS3, GUSB, GAS2, HBA2, ATP13A1, CD300A, PARP4, ATP6V0E1, HTATIP2, MSR1, NPNT, MTHFD1, ACTR3, SRPX, DYNLL1, P4HA1, CHST11, PIK3AP1, DHCR24, RAP2B, SLC25A5, CLIC1, CD163, ELMO1, SERPINB1, CHSY1, TNFSF12-TNFSF13, GRAMD1B, DEGS1, BID, HLA-DQB1, FUT8, HK2, DCHS1, SFT2D1, SFT2D2, EZR, FAT4, ALOX5AP, COL6A1, VMP1, ACSL6, KCNE3, PRSS12, SOAT1, ACTC1, PLEK, RRBP1, XKR6, HCLS1, DLGAP4, ATP1A1, LSP1, CCNB1, YWHAG, CMTM7, RBM19, ATP5A1, ADGRL1, SLC15A3, NCLN, CMTM6, TLR1, HBS1L, TTK, CNP, TNFSF13, FAM49B, SLC2A4, RPN2, FRS2, DDOST, DDX39A, BST2, STK24, ERP29, MFGE8, NCAM1, VAMP8, PI4K2A, RIPK4, STMN1, EMP3, MVP, STK16, FGFR2, GAL3ST4, LST1, MRAS, ITGB2, IL32, CTSA, FXYD5, CORO2B, EIF3D, DOCK2, DOCK1, FOLR2, HIST1H4A, ARPC3, BCHE, CLASP2, HIST1H4J, CSF1R, HIST1H4H, EEF1A1, PALM2-AKAP2, CKAP5, CKAP4, MRC2, GPR137B, DOCK8, REEP1, SLCO2B1, ABCB4, P2RX4, LYVE1, P2RX7, CORO1A, TSC1, PPIB, CXCL16, SLC7A1, IL3RA, SLC25A17, CLTA, SORL1, MAN1B1, ALG5, EPS15L1, LSS, CHPF2, HLA-DMA, SLC1A4, TSPAN12, HPSE, LOXL2, CSF2RA, KIF2A, KIF14, CDK1, HMGCLL1, ADGRE2, LIMK1, CEP41, SPINT1, MCM5, NRM, CTSC, KPNA2, SEC23B, MELK, CALCR, GALNT7, FKBP5, TNC, USP9X, CAMK2G, CALCOCO2, PPM1B, CEP55, PLPP1, VCAM1, C1QTNF3, PALM2, PIK3R5, HSPA5, SELPLG, SLC39A1, ENO1, PTPRC, PLP2, LTK, NCDN, ARHGAP45, RGS19, FRZB, MAN1C1, ANXA3, SLC18A2, JAK2, DMBT1, ATP8A1 |
| GOTERM_CC_DIRECT | GO:0042995~cell projection | 17 | 3.36E-04 | SH3PXD2B, SH3PXD2A, DRD3, NDN, AGFG1, ACTR3B, CAMP, HCK, TLR2, MDK, MEGF10, PPP1R16B, EZR, FABP7, BIN2, SPP1, SH3GL1 |
| GOTERM_CC_DIRECT | GO:0044295~axonal growth cone | 8 | 3.59E-04 | FLRT3, PARD3, SHTN1, TIAM1, TRPV2, PTCH1, L1CAM, CLASP2 |
| GOTERM_CC_DIRECT | GO:0005829~cytosol | 321 | 7.76E-04 | RPL18, XRCC4, S100A6, AIF1, CCT2, PTTG1, BTK, TPK1, MAP3K5, MYD88, SERPINE2, ATXN10, CH25H, RPL26L1, ZNF106, STAM, PELI3, CCNA1, FTL, SYK, CDCA3, PIK3CG, DEPDC7, NCF2, NCF4, MYH3, WNK1, SKP2, MYH8, THY1, MAPK1, RPS18, GAPVD1, MAD2L1, RCC2, NME1, ZWINT, RPS15, KIF26A, NEK6, ERBB4, RBP1, PFKFB2, CHKB, DAG1, ACP5, PPT1, EPHB3, IFI35, MOV10, RAC2, CRMP1, DMD, PPP2R2C, BLNK, BHMT2, S100A16, SMAD7, NPL, SMAD4, CDC23, CDC20, HBA2, GAS2, UAP1L1, KIF3C, S100A13, RGS1, PLA2G4F, RGS7, NNMT, MSR1, GNPNAT1, RLIM, ACTR3, MTHFD1, MCCC2, MTHFD2, USP18, DYNLL1, GADL1, FRAT2, SYNJ2, RAB6B, PIK3AP1, FAM129B, ZFAT, ERRFI1, DHCR24, DYNC1I1, RAP2B, CDC6, ARHGEF3, PRTFDC1, LYN, ARHGEF18, ARHGEF6, TPX2, ARHGEF16, ARHGEF9, WAS, ELMO1, DOK2, CCND2, RRM2, SRGAP1, CLN5, SERP1, BCAT1, BID, TSPOAP1, MIDN, PPP6C, PARD3, LIMS2, NCF1C, HK2, CETN2, HK1, PPP6R3, HPRT1, PFAS, CBR1, EZR, SORBS1, PDE1C, XBP1, ALOX5AP, PREPL, WIPF3, PPP3CC, WIPF1, HPGDS, PHLDA1, FYB, UBXN1, ACTC1, PLEK, BAIAP2L1, BIRC5, WWTR1, MIS12, CCNB1, YWHAG, TBATA, RPS6KA1, RPL22, BLVRB, CHN1, HTR2A, ALDH1L1, CRABP1, PRC1, RAB9B, CNDP2, CHMP4A, TIRAP, SNRPD2, IQGAP2, APOBEC3G, TNFSF13, TBC1D16, SLC2A4, TIAM1, RGN, ENOPH1, LONRF1, RNF34, MAGEL2, BCL10, NUDT4, SOCS3, NCALD, STK24, PRKAB2, STK26, CECR1, MLXIPL, TNNT2, ARPC1B, NFU1, HIF1A, ARRB2, VAMP8, AKR1B10, PI4K2A, STMN1, TNFAIP3, SNRPF, SRXN1, FGD2, ME1, MYL4, GCLC, MYL5, GRB2, DIAPH1, KCNA1, IL32, ARPC5, RBX1, EIF3D, DOCK2, PRR5, FBXW7, DOCK1, ARPC3, GALE, EIF3J, CLASP2, BMF, UNKL, GABARAPL3, CFLAR, EEF1A1, GABARAPL1, CKAP5, FSCN1, DOCK8, NMT1, PDE7B, CORO1A, CDKN1A, TSC1, TXNDC17, PLK2, PDE7A, GLMP, MYH11, SMC1A, FABP7, FABP5, RHOJ, SAT1, DMTN, IER3, KYNU, IMPA2, CLTA, ARHGAP19, PPIP5K1, TRIM5, TP53I3, CRYL1, TDO2, ACOT7, SPRY1, PRMT2, PAK3, CASP7, PRMT6, TUBA1A, CYS1, SHC2, PPP1R14A, KIF2A, ARHGAP9, PRKCA, KIF14, CDK1, RSU1, HMGCLL1, LIMK1, NADSYN1, CEP41, UBE2C, PRKCB, ARHGAP30, ATP6V1A, ARHGAP33, BUB1B, PDE9A, INPP4B, HAUS8, CA2, KPNA3, CA1, KPNA2, LCP1, LCP2, NDN, UBE3A, USP9X, CAMK2G, CYTH4, EGLN1, PPM1B, TYMS, TNRC6C, AKR1A1, ALDH1A3, PYCARD, ODF2, PIK3R5, GSTO1, DCX, TNRC6A, ENO1, DTX4, NCDN, GMDS, HCK, PNO1, PSRC1, PDZD11, CENPF, ARHGAP45, SAMSN1, RACGAP1, CDC25B, AJUBA, IFIT1, ITPA, RNF114, RNF115, IRF5, IRF7, IRF8, JAK2, ALOX5, CBS |
| GOTERM_CC_DIRECT | GO:0042613~MHC class II protein complex | 8 | 0.001436906 | HLA-DQB1, HLA-DRB1, HLA-DPA1, HLA-DPB1, HLA-DMB, HLA-DOA, HLA-DMA, HLA-DRA |
| GOTERM_CC_DIRECT | GO:0005911~cell-cell junction | 27 | 0.001860474 | PARD3, GRB2, PTK7, CD53, AQP3, ACTR3, TIAM1, TEK, CD2, FRS2, CDCA3, PTPRJ, FLRT3, C10ORF54, TRPC4, MYO1E, FSCN1, CEP41, PDZD11, WAS, AJUBA, EPB41L3, P2RX7, CORO1A, PKP2, FABP7, LCP2 |
| GOTERM_CC_DIRECT | GO:0048471~perinuclear region of cytoplasm | 73 | 0.001953241 | DMTN, STK33, S100A6, SHTN1, AIF1, PTPN22, CNP, UBQLN1, BTK, FAM168B, TMEM173, SLC2A4, ATXN10, SRD5A1, DYNC1I1, PRKCA, BCL10, HMGCLL1, LYN, STK26, CST3, CHODL, SPIRE1, PATJ, CLIC1, MAD2L1, SERPINF1, PTGDS, NME1, VAMP8, PLA2G2A, BUB1B, RAB15, PDE9A, TNFSF12-TNFSF13, CLN5, SEC23B, AKAP4, MVP, STK16, SLC2A10, CCL2, CALCOCO2, PLVAP, ITM2C, TNFRSF1B, SERINC5, PPP1R16B, EZR, RNF128, LAMB1, THBS3, TRAF4, SPP1, INF2, CAPN6, MT1M, MYO1B, TAF8, CKAP4, CHI3L1, CENPF, CDC20, S100A13, P2RX4, CYBB, CDKN1A, PPIB, TSC1, TENM1, KIF20B, PTCH1, MAP7 |
| GOTERM_CC_DIRECT | GO:0030666~endocytic vesicle membrane | 14 | 0.002529144 | HLA-DQB1, MSR1, WNT5B, HLA-DRB1, CAMK2G, COLEC12, WLS, CD163, MARCO, STAB1, HLA-DPA1, PTCH1, HLA-DPB1, HLA-DRA |
| GOTERM_CC_DIRECT | GO:0072686~mitotic spindle | 10 | 0.005357273 | EML2, CDK1, MAPK1, MAD2L1, DYNLL1, DIAPH1, CAPG, YEATS2, CLASP2, RACGAP1 |
| GOTERM_CC_DIRECT | GO:0005856~cytoskeleton | 46 | 0.005740731 | FGD2, PARD3, PRC1, SSH1, DAG1, CALCOCO2, PDLIM1, LLGL1, FRMD3, DOCK2, FRMD6, EZR, MARVELD1, DNAI1, TRIM9, DMD, RNF128, TEK, PREPL, SYNJ2, DCX, CYS1, AFAP1, TRAF4, DHCR24, PARVG, BAIAP2L1, HCK, ARHGEF18, CKAP4, MYO1E, FSCN1, GAS2, SPIRE1, COTL1, MARK1, EPB41L3, MAPK1, KRT77, TSC1, TENM1, EPB41L5, GAS2L1, JAK2, AKAP4, MVP |
| GOTERM_CC_DIRECT | GO:1903561~extracellular vesicle | 11 | 0.006846755 | OGN, CBR1, SERPINE2, TUBB2A, APOE, FGB, COL6A3, MAN1B1, MFGE8, ITGB2, ATP1A1 |
| GOTERM_CC_DIRECT | GO:0046696~lipopolysaccharide receptor complex | 4 | 0.009240807 | BCL10, LY96, TRIL, CD14 |
| GOTERM_MF_DIRECT | GO:0005201~extracellular matrix structural constituent | 20 | 1.15E-06 | HAPLN2, COL4A2, PXDN, COL4A1, HAPLN3, COL3A1, COL15A1, CHI3L1, COL2A1, COL5A3, COL5A2, COL5A1, LAMA4, BGN, COL14A1, COL1A2, ANOS1, COL1A1, LAMC1, LAMB1 |
| GOTERM_MF_DIRECT | GO:0008329~signaling pattern recognition receptor activity | 7 | 2.01E-06 | MARCO, TRIM5, FCN1, TLR2, COLEC12, CLEC7A, DMBT1 |
| GOTERM_MF_DIRECT | GO:0005515~protein binding | 805 | 3.36E-06 | PPP2R5A, GFER, BTK, OGN, ZNF778, MAP3K5, MED28, DIRAS3, SERPINE2, MED29, MAP3K9, GRIN2D, YEATS2, PIK3CG, AIG1, PTBP1, TOX4, THY1, MED19, MAPK1, NPC2, SERPINF1, RCC2, ZWINT, ROR1, SH3GL1, OSTF1, VPS72, ALCAM, HLA-DOA, PPP2R2C, SPP1, ZC3H13, ESRRG, HBA2, TMEM110, GAS1, EMILIN2, SFMBT1, PKP1, PKP2, PARP4, HTATIP2, ELF4, GAR1, PCED1A, SMAP2, USP18, IL4R, SLC22A4, SERPINA3, IGFLR1, SLC22A5, ERRFI1, PARVG, RAP2B, SH3PXD2B, SH3PXD2A, PRTFDC1, HIST1H1C, LYN, ARHGEF16, CLIC1, WAS, TTF2, ELMO1, ZNF334, TAF11, EPB41L3, DOK2, PLXDC1, DOK6, ARL4D, ARL4C, CSF2, PCOLCE, PAAF1, SORBS1, PPP3CC, ARMCX1, HPGDS, PHLDA1, IL6, IL7, TRIM29, MYF5, IGF1, STAB1, USP47, GNA14, PRC1, RAB9B, ZXDC, SNRPD2, IL10, CHIC2, TGFBI, RALB, FRS2, SAMD4A, MTUS2, BCL10, BST2, PATJ, HIF1A, ARRB2, VAMP8, STMN1, CCDC8, FGD2, PTRH1, ADAMTSL3, PTK7, IL32, ARPC5, CCL4, ZNF330, FBXW7, PEG10, HIST1H4A, ARPC3, SYAP1, TFEC, ZNF329, HIST1H4J, UNKL, HIST1H4H, MYO1E, FSCN1, BFSP1, NTN4, BFSP2, BRIP1, ABCB4, P2RX4, P2RX7, LYVE1, CDKN1A, NREP, FABP5, IER3, IMPA2, E2F5, E2F6, LYAR, PEX11G, MBP, SPRY1, ACOT7, PRMT2, CASP7, PRMT6, KIF2A, KIF14, C17ORF62, MCU, GAL, TBCB, CA8, ERN1, MAPRE2, MCC, CA2, CA1, CASQ2, SNX18, OSTC, FKBP5, MYDGF, CRLF1, EGLN1, SMOC1, RNF128, FCN1, CD2, GPNMB, SELPLG, GMDS, FAM218A, MAL, TMED9, AJUBA, CYBB, RNF115, ZBED4, VSTM2L, DSC2, RCN3, RCN1, CBS, FAM110A, CCT2, CD53, LPAR1, CD48, C1ORF109, MYD88, CD44, ATXN10, APOE, C1ORF105, SEMA7A, CREB3L1, PELI3, RAB21, FTL, SGPL1, RPUSD3, WNK1, PRKCDBP, C1QA, RND2, C1QB, PRDM4, CD33, RAB15, BIN3, PRDM1, EXT2, BIN2, NEK6, RBP7, IFI30, XK, CD70, CD72, IFI35, CD69, CRMP1, DMD, CDC37L1, BLNK, TYROBP, HPCAL1, KRT31, CD63, ZBTB44, GRK5, ZFHX3, PLAU, ZMAT3, FANCL, MCCC2, NSMCE1, CCNY, NEURL1B, RAB6B, GPX7, FANCG, GOLM1, LY96, NIP7, CD163, C1QTNF9B, PTGDS, RIN3, SERP1, BID, PPP6C, PARD3, CCR1, THAP6, COL3A1, CETN2, PPP6R3, MIF, DNALI1, XBP1, IL10RA, FAM32A, KIF21A, ETV5, UBXN1, FYB, PLEK, HCLS1, DLGAP5, DLGAP4, HSPG2, BIRC5, SNAI2, PROM1, YWHAG, FCGR2B, CAPG, CHN1, KIF20B, PTCH1, FCGR2A, ATP5A1, CD14, KIF20A, TTK, APOBEC3G, FOXO6, RABGEF1, OLIG1, LGI1, CSNK1G1, DTL, SLC22A23, PRKAB2, CST3, CNGA1, ASB9, EMP3, MVP, FGFR2, SSH1, AGFG1, GRB2, DIAPH1, ITGB2, UBE2QL1, GREM1, FXYD6, ITGAM, RBX1, CORO2B, EIF3D, KATNA1, TRO, RHNO1, EIF3J, BMF, CFLAR, EEF1A1, FOXP3, FOXP2, SALL2, PPIH, CORO1A, PPIB, PHF1, TRIM59, PPIC, CIRBP, DNMT1, ANTXR1, CHRD, SLC25A17, CLTA, CDK18, SORL1, TMEM173, PLEKHB1, CD93, CXCR4, TUBA1A, TUBA1B, CDK15, SHC2, TUBA1C, PRKCA, LAIR1, NADSYN1, CEP41, UBE2C, TMEM74, PRKCB, EML2, CD84, XPA, CD86, ARHGAP33, UTP4, UBE2Z, PPP4R1, UBE3A, CAMK2G, GLIS2, CEP55, GLS2, TNRC6C, DNAI1, HINFP, PYCARD, TNRC6A, ZC3H12D, RAD51AP1, NACC2, PSRC1, ARHGAP45, TMEM51, IRF5, TMEM43, IRF7, IRF8, LSM11, ALOX5, MPL, ACTR10, XRCC4, SLC9A7, TUBB2B, SURF6, TUBB2A, STOML1, NMRK1, CCDC141, FAP, CCNA1, CCNA2, CDCA4, SYK, CDCA3, PTPRJ, NCF2, RCOR3, NCF4, SKP2, RXRG, NME7, PLAUR, RPS18, NME1, RPS15, TGIF1, TRIML2, ERBB4, ERBB3, PPT1, PROCR, ZNF622, KLF15, PCDH17, ADAP2, CD300A, HEBP2, PCNA, CD200, MSR1, LEPROTL1, MARCKSL1, PWWP2B, UFC1, PDIA4, RTN1, MTHFD1, DYNLL1, P4HA1, SMPDL3A, SYNJ2, CD200R1, CDC7, CDC6, ARHGEF3, CMKLR1, ARHGEF6, TPX2, MXD1, SRPK1, WDR47, CCND2, RRM2, CLN5, SRGAP1, TSPOAP1, HSD3B7, HK2, FHL2, HK1, ITM2C, EZR, ALOX5AP, WIPF1, VMP1, KCNE5, KCNE3, MAGEF1, TRIP13, SOAT1, FLRT3, CPT1C, ELAVL2, NID2, WWTR1, CCL18, CCNB1, RASSF4, RASSF5, RPS6KA1, RPL22, RASSF2, MPPED2, ADGRL1, CMTM3, NCLN, ATP6AP2, STK36, NRCAM, FAM49B, SLC2A4, RPN2, LONRF1, DDOST, SPON1, KCND3, KCND2, NUDT4, STK24, NCALD, STK26, HDAC10, TMSB10, WEE1, JUNB, HCST, NFU1, AKR1B10, TNFAIP8, COL1A2, DDX31, COL1A1, PTGFRN, TNFAIP3, UGGT1, STK16, HMGB3, DRD3, STK10, MRAS, KCNA1, TIMP1, AMER3, VDR, DOCK2, SLC48A1, DOCK1, FGB, TEK, ZNF426, LYSMD1, SSX3, TRAF4, MRC1, TAF4, HENMT1, TAF8, MRC2, ARID3A, DOCK8, SHANK2, ZC2HC1C, PLK2, TSC1, SLC7A1, MYH11, RHOJ, SAT1, ZKSCAN4, TMEM234, TRIM5, TSPAN12, FRMD6, TRIM9, CSF2RB, OIT3, DLG5, LOXL2, CSF2RA, CDK1, LIMK2, LRIF1, LIMK1, PBK, CHRM3, INPP4B, PDE9A, JAM2, CPSF3, CHFR, JAM3, SEC23B, LCP2, TYRP1, KMT2B, RNH1, CALCOCO2, PF4, PPM1B, ZNF512B, AKR1A1, KIF6, C1QTNF2, ODF2, HSPA5, ADAMTS12, DCX, PLP2, COL4A2, PLP1, COL4A1, NCDN, HCK, SAMHD1, COTL1, CDC25B, FZD10, IFIT1, ZRANB1, JAK2, PLEKHN1, GGA2, THEMIS2, FEZ2, DMBT1, S100A6, FAM20A, PTPN22, PDLIM2, PTTG1, ZNRF3, SHD, CRY2, PLOD3, ASMTL, H2AFZ, TCEANC2, STAM, HTRA3, CFI, S100A2, F10, PIM1, LILRB2, UHRF1, MAD2L1, EFNA4, ADGRA2, SIVA1, KCNMB4, PFKFB2, DAG1, LAMB3, MOV10, TCTEX1D2, FCER1G, GAD1, TRPC4, S100A16, LGALS3, KANSL2, SMAD7, LGALS2, S100A11, NPL, SMAD4, CDC23, CDC20, ECM1, S100A13, LAMA4, ABCG5, CSRNP1, CLEC7A, PDZK1, SLC15A2, WBP4, ACTR3, TNFRSF11A, TOP2A, DYNC1I1, SLC25A5, SPEN, GADD45B, GADD45A, CLDN16, FAM98A, UNG, HPRT1, FAM46A, FAT4, C12ORF49, ACTL6A, THBS1, SERGEF, TBX2, BAIAP2L1, ATP1A1, MIS12, YAF2, CDON, PBX1, BCAR3, TOB1, THRB, CRABP1, SHTN1, CHMP4A, TLR1, ARNT2, CBX4, TLR2, TIRAP, CBX2, UBQLN1, TBC1D19, TBC1D16, TIAM1, LOX, RNF34, PAG1, DDX39A, MAGEL2, SOCS3, FUT11, TNFRSF14, NR0B2, ELL3, MOXD1, TNNT2, GNS, MAP4K4, PI4K2A, ANOS1, RIPK4, SNRPF, PRPS2, TSHZ3, CACUL1, NINJ2, SOX4, MRAP2, ELK3, LLGL1, LLGL2, PPP1R16B, LAPTM5, ENTPD5, SFTPC, CLASP2, RUNX3, SRGN, HAVCR2, GABARAPL1, CSTF3, CKAP5, MAFB, REEP1, TXNDC12, TXNDC17, UCP2, SMC1A, DMTN, HPS3, EPS15L1, BUD31, SLA, PAK6, TDO2, KCNQ4, SLN, PAK3, HPSE, TPP1, CYS1, KCNQ1, ARHGAP9, EGR1, RSU1, EGR2, KHDRBS2, DYNLT1, WLS, MCM5, MCM6, CTSL, NRM, GRN, BTG3, ZNF711, BUB1B, SGF29, CTSC, KPNA3, KPNA2, MELK, CALCR, TNFRSF21, USP9X, PLVAP, C3ORF62, MYOT, SCARF2, TNFRSF1B, MSI2, GSTO1, MYOF, ENO1, SYNPO, PTPRC, PTPRE, LTK, PDZD11, RGS19, CENPF, SPARC, RACGAP1, KCNN4, TDP1, CENPW, CYP4F2, MUC17, ATP8A1 |
| GOTERM_MF_DIRECT | GO:0005518~collagen binding | 18 | 4.24E-06 | ASPN, SMAD7, MRC2, SMAD4, ITGA10, SPARC, CTSS, NID2, COL5A3, PCOLCE, CTSL, P3H1, COL14A1, CD44, PPIB, TGFBI, ANTXR1, SRGN |
| GOTERM_MF_DIRECT | GO:0004872~receptor activity | 36 | 9.14E-05 | CALCR, PLXNA1, ATP6AP2, TLR1, CRLF1, TLR2, ITGB2, TLR5, TLR8, CD48, APLNR, TNFRSF11A, PROCR, CD93, ITGB8, IL10RA, TEK, ROBO4, CD2, CSF2RB, CSF2RA, CD200R1, MRC1, CMKLR1, RRBP1, CD180, PLAUR, LILRB2, TNFRSF9, CD86, LYVE1, CHRM3, CD33, MCC, ANTXR1, CD200 |
| GOTERM_MF_DIRECT | GO:0048407~platelet-derived growth factor binding | 7 | 9.91E-05 | COL4A1, COL3A1, COL1A2, COL6A1, COL2A1, COL1A1, COL5A1 |
| GOTERM_MF_DIRECT | GO:0051015~actin filament binding | 24 | 4.59E-04 | MYL4, SHTN1, MYO1B, AIF1, MYO1E, MYH3, FSCN1, IQGAP2, ARPC5, MYH8, AJUBA, CORO2B, ACTR3, ARPC1B, CORO1A, EZR, ARPC3, MYH11, AIF1L, WIPF3, ANTXR1, CLASP2, WIPF1, LCP1 |
| GOTERM_MF_DIRECT | GO:0045545~syndecan binding | 5 | 6.00E-04 | SEMA5A, HPSE, TNC, GPNMB, CHRD |
| GOTERM_MF_DIRECT | GO:0032395~MHC class II receptor activity | 7 | 8.05E-04 | HLA-DQB1, HLA-DRB1, HLA-DPA1, HLA-DPB1, HLA-DOA, HLA-DMA, HLA-DRA |
| GOTERM_MF_DIRECT | GO:0050840~extracellular matrix binding | 9 | 8.41E-04 | BGN, SPOCK2, OLFML2B, TGFBI, ADAMTS15, OLFML2A, SPARC, THBS1, SPP1 |
| GOTERM_MF_DIRECT | GO:0043394~proteoglycan binding | 6 | 0.001138296 | CTSL, CECR1, CTSS, COL5A3, THBS1, COL5A1 |
| GOTERM_MF_DIRECT | GO:0003779~actin binding | 39 | 0.001361491 | DMTN, TBCCD1, SSH1, MARCKSL1, ACTR3B, DIAPH1, DAG1, IQGAP2, ANLN, FXYD5, DAAM2, WHAMM, MYOT, CORO2B, EZR, MED28, SORBS1, CXCR4, DMD, WIPF1, AFAP1, SYNPO, PARVG, INF2, BAIAP2L1, NCALD, HCLS1, FSCN1, MYO1F, SPIRE1, COTL1, WAS, LSP1, TNNT2, EPB41L3, CORO1A, GMFG, CAPG, LCP1 |
| GOTERM_MF_DIRECT | GO:0008201~heparin binding | 26 | 0.001386263 | FGFBP3, FGFR2, CCL2, ADAMTS15, PRG2, CECR1, CCDC80, CCL8, PF4, COL5A3, MDK, PCOLCE, COL5A1, OGN, SERPINE2, TENM1, RPL22, APOE, RSPO3, FBLN7, ANOS1, PTCH1, THBS1, GPNMB, CHRD, THBS3 |
| GOTERM_MF_DIRECT | GO:0030246~carbohydrate binding | 30 | 0.00145012 | EMCN, CHIA, GALNT7, C4B_2, CD72, REG1B, CD93, CD69, FCN1, CLEC4A, MAN2B1, LGALS3, WBSCR17, MRC2, PRG2, LGALS2, SIGLEC10, CHI3L1, CHODL, LGALS9, CLEC11A, MAN2A2, CLEC1A, MGAT2, SIGLEC1, CD33, ADGRL1, CLEC7A, GALNT9, PRPS2 |
| GOTERM_MF_DIRECT | GO:0005044~scavenger receptor activity | 12 | 0.001486901 | MARCO, MSR1, STAB1, CXCL16, COLEC12, CFI, LOXL2, MEGF10, PRSS12, DMBT1, CD163, SCARF2 |
| GOTERM_MF_DIRECT | GO:0005200~structural constituent of cytoskeleton | 20 | 0.001537914 | TUBB2B, TUBB2A, BFSP1, KRT31, BFSP2, ARPC5, ACTR3, FRMD3, EPB41L3, ARPC1B, FRMD6, ARPC3, DMD, EPB41L5, TUBB6, NEFH, TUBB1, TUBA1A, TUBA1B, TUBA1C |
| GOTERM_MF_DIRECT | GO:0008017~microtubule binding | 31 | 0.00182203 | PRC1, CETN2, WDR81, WHAMM, EZR, KIF6, TIAM1, KATNA1, NEFH, CLASP2, DCX, KIF21A, MTUS2, KIF2A, DYNC1I1, CAPN6, KIF14, PSRC1, GAS2, BIRC5, REEP1, RACGAP1, SAXO2, KIF3C, EML2, RCC2, KIF20B, GAS2L1, MAPRE2, KIF26A, KIF20A |
| GOTERM_MF_DIRECT | GO:0042803~protein homodimerization activity | 80 | 0.007185289 | SLC9A7, IMPA2, KYNU, S100A6, CHMP4A, TIRAP, TTK, APOBEC3G, TRIM5, CRYL1, TMEM173, MAP3K5, ACOT7, TP53I3, PRMT2, TRIM9, APOE, MAP3K9, FAP, TOP2A, MTUS2, PRTFDC1, BST2, STK26, ERP29, MLXIPL, CECR1, OLFML2A, NR0B2, C1QB, XPA, MAD2L1, ERN1, JAM3, EXT2, CASQ2, PRPS2, FGFR2, TYRP1, ERBB4, ERBB3, STK10, CAMK2G, CALCOCO2, PLVAP, HPRT1, TYMS, GLIPR2, XBP1, ALDH1A3, CD2, PYCARD, GALE, ACSL6, HPGDS, CSF1R, FLRT3, S100A16, NACC2, PLEK, ARID3A, SMAD4, S100A11, CENPF, BIRC5, NPR3, FOXP3, WWTR1, S100A13, XPNPEP1, FOXP2, TENM4, P2RX4, CORO1A, P2RX7, TENM1, KIF20B, XCL1, CD200, CBS |
| GOTERM_MF_DIRECT | GO:0017124~SH3 domain binding | 19 | 0.008526004 | OSTF1, KHDRBS2, LYN, FUT8, GRB2, HCLS1, PTPN22, AFAP1L2, PTTG1, WAS, SHANK2, ELMO1, DOCK1, PAK3, WIPF3, ZNF106, WIPF1, ADAM12, ERRFI1 |

**Supplementary Table.3 The KEGG analysis of genes in black module (*p*<0.01)**

| **Category** | **Term** | **Count** | **PValue** | **Genes** |
| --- | --- | --- | --- | --- |
| KEGG_PATHWAY | hsa05150:Staphylococcus aureus infection | 21 | 2.87E-08 | HLA-DQB1, C3AR1, C5AR1, HLA-DRB1, FPR3, ITGB2, HLA-DMB, HLA-DMA, C1QC, ITGAM, IL10, C1QA, C1QB, FCGR2B, HLA-DPA1, FCGR2A, CFI, HLA-DPB1, HLA-DOA, SELPLG, HLA-DRA |
| KEGG_PATHWAY | hsa04145:Phagosome | 37 | 6.77E-08 | HLA-DQB1, ATP6V0E1, MSR1, TUBB2B, HLA-DRB1, TUBB2A, TLR2, ITGB2, HLA-DMB, HLA-DMA, ITGAM, MARCO, TUBB6, HLA-DPB1, HLA-DOA, THBS1, TUBB1, TUBA1A, TUBA1B, THBS3, TUBA1C, MRC1, DYNC1I1, NCF2, NCF4, MRC2, COLEC12, CTSS, CTSL, ATP6V1A, CORO1A, FCGR2B, HLA-DPA1, FCGR2A, CLEC7A, CD14, HLA-DRA |
| KEGG_PATHWAY | hsa05152:Tuberculosis | 39 | 6.43E-07 | HLA-DQB1, BID, HLA-DRB1, CAMK2G, TLR1, TLR2, TIRAP, ITGB2, HLA-DMB, HLA-DMA, RFXAP, IL10, ITGAM, VDR, MYD88, IL10RA, FCER1G, PPP3CC, CALML5, HLA-DPB1, HLA-DOA, SYK, MRC1, BCL10, CR1, IL6, CAMP, MRC2, CTSS, LSP1, MAPK1, CORO1A, FCGR2B, JAK2, HLA-DPA1, FCGR2A, CLEC7A, CD14, HLA-DRA |
| KEGG_PATHWAY | hsa04512:ECM-receptor interaction | 25 | 7.39E-07 | COL4A2, COL4A1, TNC, COL3A1, DAG1, HSPG2, ITGA10, COL2A1, COL5A3, COL5A2, COL5A1, LAMA4, LAMB3, CD44, COL6A6, ITGB8, COL6A3, COL1A2, COL6A1, COL1A1, LAMC1, LAMB1, THBS1, THBS3, SPP1 |
| KEGG_PATHWAY | hsa05146:Amoebiasis | 27 | 2.98E-06 | CSF2, GNA14, GNA15, COL3A1, TLR2, COL2A1, ITGB2, IL10, ITGAM, LAMB3, PIK3R5, LAMB1, PRKCA, PIK3CG, COL4A2, IL6, COL4A1, COL5A3, COL5A2, COL5A1, PRKCB, LAMA4, COL1A2, SERPINB1, LAMC1, COL1A1, CD14 |
| KEGG_PATHWAY | hsa05130:Pathogenic Escherichia coli infection | 17 | 8.77E-06 | PRKCA, TUBB2B, LY96, TUBB2A, HCLS1, ARPC5, TLR5, WAS, ARPC1B, EZR, ARPC3, TUBB6, TUBB1, TUBA1A, TUBA1B, CD14, TUBA1C |
| KEGG_PATHWAY | hsa05323:Rheumatoid arthritis | 23 | 1.24E-05 | HLA-DQB1, CSF2, ATP6V0E1, IL6, CCL2, HLA-DRB1, TLR2, ACP5, TNFSF13, ITGB2, HLA-DMB, HLA-DMA, CXCL12, CTSL, ATP6V1A, CD86, TNFRSF11A, CCL3L3, TEK, HLA-DPA1, HLA-DPB1, HLA-DOA, HLA-DRA |
| KEGG_PATHWAY | hsa05140:Leishmaniasis | 20 | 1.71E-05 | HLA-DQB1, CR1, HLA-DRB1, NCF2, MARCKSL1, NCF4, TLR2, ITGB2, HLA-DMB, HLA-DMA, ITGAM, IL10, MAPK1, MYD88, JAK2, HLA-DPA1, FCGR2A, HLA-DPB1, HLA-DOA, HLA-DRA |
| KEGG_PATHWAY | hsa04974:Protein digestion and absorption | 22 | 4.13E-05 | COL4A2, COL4A1, ATP1B3, COL3A1, ATP1B4, COL15A1, COL2A1, ATP1A1, COL5A3, COL5A2, COL5A1, SLC7A7, KCNN4, COL14A1, COL6A6, COL6A3, COL1A2, CPA3, COL6A1, COL1A1, KCNQ1, KCNE3 |
| KEGG_PATHWAY | hsa04110:Cell cycle | 27 | 5.86E-05 | E2F5, TTK, PTTG1, RBX1, CCNA1, CCNA2, CDC7, CDC6, CDK1, SKP2, SMAD4, CDC23, CDC20, WEE1, MCM5, CDC25B, MCM6, CCNB1, CDKN1A, YWHAG, MAD2L1, CCND2, PCNA, BUB1B, SMC1A, GADD45B, GADD45A |
| KEGG_PATHWAY | hsa04666:Fc gamma R-mediated phagocytosis | 21 | 6.50E-05 | PRKCA, PIK3CG, PTPRC, LYN, LIMK2, MARCKSL1, LIMK1, HCK, ARPC5, PLPP1, WAS, PRKCB, MAPK1, ARPC1B, DOCK2, FCGR2B, RAC2, ARPC3, PIK3R5, FCGR2A, SYK |
| KEGG_PATHWAY | hsa04510:Focal adhesion | 38 | 6.53E-05 | MYL5, GRB2, DIAPH1, TNC, COL3A1, ITGA10, COL2A1, PAK6, LAMB3, DOCK1, RAC2, COL6A6, ITGB8, PAK3, COL6A3, COL6A1, PIK3R5, LAMB1, THBS1, SHC2, THBS3, SPP1, PARVG, PRKCA, PIK3CG, COL4A2, COL4A1, IGF1, COL5A3, COL5A2, COL5A1, PRKCB, MAPK1, LAMA4, CCND2, COL1A2, COL1A1, LAMC1 |
| KEGG_PATHWAY | hsa05310:Asthma | 11 | 2.49E-04 | HLA-DQB1, HLA-DRB1, PRG2, FCER1G, HLA-DPA1, HLA-DPB1, HLA-DMB, HLA-DOA, HLA-DMA, IL10, HLA-DRA |
| KEGG_PATHWAY | hsa04672:Intestinal immune network for IgA production | 14 | 2.55E-04 | HLA-DQB1, IL6, HLA-DRB1, TNFSF13, HLA-DMB, CXCL12, HLA-DMA, IL10, CD86, CXCR4, HLA-DPA1, HLA-DPB1, HLA-DOA, HLA-DRA |
| KEGG_PATHWAY | hsa04151:PI3K-Akt signaling pathway | 51 | 9.63E-04 | OSMR, PPP2R5A, TLR2, LPAR1, IL4R, CREB3L1, PIK3AP1, SYK, PRKCA, PIK3CG, FGF23, MAPK1, CCND2, COL1A2, EFNA4, COL1A1, LAMC1, FGFR2, GRB2, TNC, COL3A1, ITGA10, COL2A1, GNG11, LAMB3, COL6A6, ITGB8, COL6A3, TEK, COL6A1, PIK3R5, THBS1, LAMB1, PPP2R2C, THBS3, SPP1, CSF1R, IL6, COL4A2, COL4A1, IL7, IGF1, COL5A3, COL5A2, COL5A1, LAMA4, YWHAG, CDKN1A, TSC1, JAK2, IL3RA |
| KEGG_PATHWAY | hsa04514:Cell adhesion molecules (CAMs) | 26 | 0.001315677 | CLDN16, HLA-DQB1, HLA-DRB1, L1CAM, ITGB2, HLA-DMB, HLA-DMA, ITGAM, ALCAM, VCAM1, NRCAM, ITGB8, CD2, HLA-DPB1, HLA-DOA, SELPLG, PTPRC, NRXN2, CD99, NCAM1, SIGLEC1, CD86, HLA-DPA1, JAM2, JAM3, HLA-DRA |
| KEGG_PATHWAY | hsa04142:Lysosome | 23 | 0.001640415 | CLTA, LIPA, GM2A, GUSB, LGMN, ACP5, CTSA, PPT1, CTSS, AP4S1, CD63, GNS, CTSL, NPC2, LAPTM5, TPP1, GALNS, GALC, CTSC, MCOLN1, MAN2B1, GGA2, CLN5 |
| KEGG_PATHWAY | hsa05416:Viral myocarditis | 14 | 0.001855016 | HLA-DQB1, BID, HLA-DRB1, DAG1, ITGB2, HLA-DMB, HLA-DMA, CD86, RAC2, DMD, HLA-DPA1, HLA-DPB1, HLA-DOA, HLA-DRA |
| KEGG_PATHWAY | hsa04380:Osteoclast differentiation | 24 | 0.002098346 | CALCR, PIK3CG, NCF2, GRB2, SOCS3, NCF4, FHL2, ACP5, JUNB, BTK, LILRB2, MAPK1, CYBB, TNFRSF11A, FCGR2B, LILRB5, PPP3CC, PIK3R5, FCGR2A, SYK, TYROBP, LCP2, BLNK, CSF1R |
| KEGG_PATHWAY | hsa05332:Graft-versus-host disease | 10 | 0.002519997 | HLA-DQB1, IL6, CD86, HLA-DRB1, HLA-DPA1, HLA-DPB1, HLA-DMB, HLA-DOA, HLA-DMA, HLA-DRA |
| KEGG_PATHWAY | hsa05133:Pertussis | 16 | 0.003414671 | IL6, LY96, TIRAP, ITGB2, C1QC, IL10, ITGAM, C1QA, C1QB, MAPK1, MYD88, CASP7, IRF8, PYCARD, CALML5, CD14 |
| KEGG_PATHWAY | hsa00510:N-Glycan biosynthesis | 12 | 0.00463548 | MAN2A2, MGAT2, TUSC3, ST6GAL2, FUT8, MAN1B1, ALG5, RPN2, ALG8, MAN1C1, DDOST, ALG13 |
| KEGG_PATHWAY | hsa05321:Inflammatory bowel disease (IBD) | 14 | 0.005423827 | HLA-DQB1, IL6, HLA-DRB1, TLR2, TLR5, HLA-DMB, FOXP3, HLA-DMA, IL10, IL4R, HLA-DPA1, HLA-DPB1, HLA-DOA, HLA-DRA |
| KEGG_PATHWAY | hsa05330:Allograft rejection | 10 | 0.005800609 | HLA-DQB1, CD86, HLA-DRB1, HLA-DPA1, HLA-DPB1, HLA-DMB, HLA-DOA, HLA-DMA, IL10, HLA-DRA |
| KEGG_PATHWAY | hsa05145:Toxoplasmosis | 20 | 0.005935286 | HLA-DQB1, HLA-DRB1, LY96, TLR2, HLA-DMB, HLA-DMA, IL10, MAPK1, LAMB3, LAMA4, MYD88, IL10RA, JAK2, HLA-DPA1, ALOX5, LAMC1, HLA-DPB1, HLA-DOA, LAMB1, HLA-DRA |
| KEGG_PATHWAY | hsa04062:Chemokine signaling pathway | 29 | 0.007273337 | PARD3, CCL2, ADCY7, GRB2, CCR1, CCL8, GNG11, PF4, CXCL12, CCL4, DOCK2, RAC2, CXCR4, TIAM1, CCL3L3, PIK3R5, SHC2, PIK3CG, LYN, HCK, WAS, CCL18, ELMO1, MAPK1, ARRB2, CXCL16, JAK2, GRK5, XCL1 |
| KEGG_PATHWAY | hsa04960:Aldosterone-regulated sodium reabsorption | 10 | 0.008352406 | PRKCA, PIK3CG, MAPK1, ATP1B3, ATP1B4, HSD11B2, IGF1, ATP1A1, PIK3R5, PRKCB |
| KEGG_PATHWAY | hsa04664:Fc epsilon RI signaling pathway | 14 | 0.009168144 | PRKCA, PIK3CG, CSF2, LYN, GRB2, PRKCB, BTK, MAPK1, RAC2, FCER1G, PLA2G4F, PIK3R5, LCP2, SYK |
| KEGG_PATHWAY | hsa04670:Leukocyte transendothelial migration | 20 | 0.009592269 | PRKCA, PIK3CG, CLDN16, MYL5, NCF2, NCF4, CD99, ITGB2, CXCL12, ITGAM, PRKCB, THY1, VCAM1, RASSF5, EZR, RAC2, CXCR4, PIK3R5, JAM2, JAM3 |
| KEGG_PATHWAY | hsa05134:Legionellosis | 12 | 0.009936588 | EEF1A1, CR1, IL6, MYD88, CASP7, HBS1L, PYCARD, TLR2, ITGB2, TLR5, ITGAM, CD14 |

**Supplementary Table.4 The GO analysis of genes in lightgreen module (*p*<0.01)**

| **Category** | **Term** | **Count** | **PValue** | **Genes** |
| --- | --- | --- | --- | --- |
| GOTERM_BP_DIRECT | GO:0002480~antigen processing and presentation of exogenous peptide antigen via MHC class I, TAP-independent | 5 | 7.84E-06 | HLA-A, HLA-C, HLA-B, HLA-E, HLA-F |
| GOTERM_BP_DIRECT | GO:0002474~antigen processing and presentation of peptide antigen via MHC class I | 6 | 1.08E-04 | HLA-A, HLA-C, HLA-B, HLA-E, SAR1B, HLA-F |
| GOTERM_BP_DIRECT | GO:0002479~antigen processing and presentation of exogenous peptide antigen via MHC class I, TAP-dependent | 7 | 5.26E-04 | PSMD12, HLA-A, HLA-C, HLA-B, PSME4, HLA-E, HLA-F |
| GOTERM_BP_DIRECT | GO:0002486~antigen processing and presentation of endogenous peptide antigen via MHC class I via ER pathway, TAP-independent | 3 | 7.70E-04 | HLA-A, HLA-C, HLA-B |
| GOTERM_BP_DIRECT | GO:0000209~protein polyubiquitination | 11 | 8.29E-04 | CUL3, RNF125, PSMD12, C18ORF25, UBR2, ASB2, NPEPPS, PSME4, ZNRF1, UBE2B, CUL1 |
| GOTERM_BP_DIRECT | GO:0042787~protein ubiquitination involved in ubiquitin-dependent protein catabolic process | 10 | 8.58E-04 | CUL3, RMND5A, C18ORF25, CUL4A, NEDD4, BTBD6, ASB2, CUL1, OS9, HECTD1 |
| GOTERM_BP_DIRECT | GO:0005977~glycogen metabolic process | 5 | 0.001146722 | PPP1R3C, PHKB, PHKA1, SLC37A4, PPP1R3A |
| GOTERM_BP_DIRECT | GO:0043161~proteasome-mediated ubiquitin-dependent protein catabolic process | 11 | 0.00173815 | CUL3, RNF6, RMND5A, PSMD12, C18ORF25, CUL4A, BTBD6, PSME4, ZNRF1, UBE2B, CUL1 |
| GOTERM_BP_DIRECT | GO:0016567~protein ubiquitination | 15 | 0.002181581 | SOCS6, ASB14, TRIM63, UBE2B, FEM1A, OS9, MID2, ZYG11B, CUL3, KBTBD2, DCAF6, NEDD4, RNF168, FBXO32, CUL1 |
| GOTERM_BP_DIRECT | GO:0042270~protection from natural killer cell mediated cytotoxicity | 3 | 0.002512937 | HLA-A, HLA-B, HLA-E |
| GOTERM_BP_DIRECT | GO:0006511~ubiquitin-dependent protein catabolic process | 10 | 0.002843982 | CUL3, RNF6, CUL4A, USP38, FBXO32, RNF168, USP25, USP24, UBE2B, CUL1 |
| GOTERM_BP_DIRECT | GO:0060337~type I interferon signaling pathway | 6 | 0.003703408 | IRF9, HLA-A, HLA-C, HLA-B, HLA-E, HLA-F |
| GOTERM_BP_DIRECT | GO:0060333~interferon-gamma-mediated signaling pathway | 6 | 0.005774482 | IRF9, HLA-A, HLA-C, HLA-B, HLA-E, HLA-F |
| GOTERM_BP_DIRECT | GO:0000086~G2/M transition of mitotic cell cycle | 8 | 0.006858287 | MNAT1, TUBB, NES, PAFAH1B1, LOC400927-CSNK1E, CUL1, CEP70, PPP2R2A |
| GOTERM_BP_DIRECT | GO:0022617~extracellular matrix disassembly | 6 | 0.00767987 | A2M, BMP1, ELN, MMP16, NID1, MMP2 |
| GOTERM_CC_DIRECT | GO:0012507~ER to Golgi transport vesicle membrane | 8 | 1.49E-05 | HLA-A, HLA-C, HLA-B, HLA-E, SAR1B, SEC23IP, CD74, HLA-F |
| GOTERM_CC_DIRECT | GO:0031012~extracellular matrix | 17 | 1.69E-05 | MYL6, COL18A1, NES, GANAB, COL21A1, IGFBP7, SLC25A6, TGFB3, NID1, MMP16, MMP2, LGALS3BP, TUBB, LAMB2, FBLN5, CFL1, COL6A2 |
| GOTERM_CC_DIRECT | GO:0042612~MHC class I protein complex | 5 | 1.72E-05 | HLA-A, HLA-C, HLA-B, HLA-E, HLA-F |
| GOTERM_CC_DIRECT | GO:0071556~integral component of lumenal side of endoplasmic reticulum membrane | 6 | 7.63E-05 | HLA-A, HLA-C, HLA-B, HLA-E, CD74, HLA-F |
| GOTERM_CC_DIRECT | GO:0005829~cytosol | 78 | 1.07E-04 | TGOLN2, NT5C1B-RDH14, A2M, PHKB, AGTPBP1, IDE, RHOQ, PHF20, DPH3, ZNRF1, CEP70, CUL3, ATG5, LOC101060521, AAGAB, SHC1, RANBP2, SAR1B, GOLGA4, CUL1, ARHGEF2, ROCK2, BTBD6, ARHGEF17, PDE4D, UBR2, NPEPPS, LPIN1, IRS1, PGM2L1, PPM1F, PGLS, ANKRD28, SEC61B, NBR1, PGM1, TXNRD1, CLIP3, PSME4, DST, KPNA1, PPP2R2A, MYL6, YWHAZ, EIF4E3, GNAI2, HUS1, PHKA1, PFKFB1, PPM1A, UBA5, SESN1, LOC400927-CSNK1E, ZFP36L1, TFAM, PPP1R3C, RPS28, EFR3A, PAFAH1B1, SEC23IP, PSTPIP2, ACTB, UPF2, NOS1, AIMP1, TPMT, APPL1, TAB2, CENPI, MSRB3, DENND1B, IRF9, CORO1B, GSPT1, PSMD12, NEDD4, ECSCR, IDI1 |
| GOTERM_CC_DIRECT | GO:0005654~nucleoplasm | 66 | 3.82E-04 | TGOLN2, DYNC1LI1, FAM20B, FOXK2, IDE, COPRS, MITF, PHF20, DPH3, UTP11, IL17RD, CBX6, ACBD5, CEP70, CUL3, LOC101060521, AAGAB, GOLGA4, CUL1, SCAMP2, CGRRF1, OPA1, SNAPC3, MPP5, UBR2, UBE2B, LPIN1, SENP2, PDIK1L, ANKRD28, PYGO1, TXNRD1, CCDC174, KPNA1, PPP2R2A, YWHAZ, GNAI2, KMT2C, HUS1, PPM1A, HAT1, NFYB, RRM2B, MTIF2, TCF7L2, LOC400927-CSNK1E, ATF1, RPS28, HEXIM2, RNF168, ASF1A, BCAS2, ACTB, KLF12, CEBPG, CENPI, IWS1, IRF9, PRELID1, MNAT1, RNF6, WDR26, PSMD12, CUL4A, MCPH1, FBXO32 |
| GOTERM_CC_DIRECT | GO:0031901~early endosome membrane | 9 | 4.58E-04 | CLCN3, HLA-A, HLA-C, CLIP3, HLA-B, APPL1, HLA-E, SNX13, HLA-F |
| GOTERM_CC_DIRECT | GO:0030670~phagocytic vesicle membrane | 6 | 0.002201135 | ATG5, HLA-A, HLA-C, HLA-B, HLA-E, HLA-F |
| GOTERM_CC_DIRECT | GO:0070062~extracellular exosome | 63 | 0.002257282 | TSPO, A2M, IGFBP7, RHOQ, CUL3, ATP2B2, GOLGA4, KDELR2, SCAMP2, ZCCHC11, HLA-A, MPP5, HLA-C, HLA-B, NPEPPS, HLA-E, GNAL, PGLS, NBR1, CFL1, CD81, PGM1, EDF1, PDGFRB, TXNRD1, DST, MYL6, YWHAZ, NACA, GANAB, GNAI2, RRM2B, TAGLN2, SERPINH1, CD74, ITM2A, ISLR, TUBB, LGALS3BP, RPS28, LAMB2, SHISA5, COL6A2, EFR3A, PAFAH1B1, C2, MYO5B, ACTB, COL18A1, CFB, C17ORF80, CD276, NID1, MXRA8, TPMT, APPL1, MID2, CORO1B, PSMD12, NEDD4, FBLN5, MCPH1, IGFBP3 |
| GOTERM_CC_DIRECT | GO:0000139~Golgi membrane | 20 | 0.002360778 | KDELR2, CLCN3, FAM20B, HLA-A, HLA-C, HLA-B, HLA-E, IL17RD, CD74, USF3, HLA-F, RNF125, CUL3, MIA3, ANKRD28, GNPTAB, B3GALNT2, GOLGA4, SEC23IP, EBAG9 |
| GOTERM_CC_DIRECT | GO:0005737~cytoplasm | 102 | 0.005751745 | DYNC1LI1, NT5C1B-RDH14, TSPO, ADCY2, IDE, AQP4, PTPN20, CEP70, MAGED1, ATP2B2, ATG5, AAGAB, C1ORF198, OPA1, SOCS6, UBR2, SIX4, IRS1, PKIA, CTNNA3, DCAF6, PGM1, EDF1, PDGFRB, PPP2R5E, DST, ASB4, CDV3, EIF4E3, GNAI2, ASB14, UBA5, RRM2B, SESN1, LOC400927-CSNK1E, TUBB, RPS28, NAA30, HEXIM2, RNF168, SEC23IP, HECTD1, ARL14EP, KLF12, PTPN18, PTPN4, TRIM63, CORO1B, TRAF3IP1, RNF6, NEDD4, MCPH1, FBXO32, TRIP6, FAM175B, AGTPBP1, COPRS, PHF20, DPH3, UTP11, RMND5A, GOLGA4, WDR34, TFIP11, ARHGEF2, ZCCHC11, MPP5, UBE2B, LPIN1, EML3, BTG1, CFL1, USP25, NKIRAS1, USP24, KPNA1, TAPT1, PREP, YWHAZ, NACA, HAT1, TCF7L2, FEM1A, ZFP36L1, PLCL2, PLCL1, GPHN, FAM117A, TUBA3D, ACTB, NES, UPF2, NOS1, AIMP1, APPL1, CENPI, MID2, IRF9, MNAT1, PSMD12, WDR26, APIP |
| GOTERM_CC_DIRECT | GO:0031461~cullin-RING ubiquitin ligase complex | 3 | 0.008049679 | CUL3, CUL4A, CUL1 |
| GOTERM_MF_DIRECT | GO:0005515~protein binding | 177 | 1.02E-05 | TGOLN2, DYNC1LI1, TSPO, A2M, C16ORF72, IDE, TGFB3, JAG1, ZNRF1, MMP2, CBX6, CEP70, MAGED1, CUL3, ATP2B2, ATG5, AAGAB, TLK2, CUL1, OPA1, SCAMP2, ROCK2, HLA-A, SOCS6, UBR2, PDE4D, MAGED2, PKIA, IRS1, CTNNA3, TIMM8A, PGLS, SEC61B, NBR1, PGM1, PYGO1, CARTPT, PDGFRB, EDF1, PPP2R5E, ASB2, CLIP3, DST, FASTKD5, ZNF41, MYL6, CLCN3, SCN1B, GNAI2, HUS1, ELN, PFKFB1, UBA5, RRM2B, TAGLN2, SESN1, CD74, ATF1, LOC400927-CSNK1E, PPP1R3C, TUBB, MIA3, RPS28, HEXIM2, NAA30, RNF168, PLXND1, SEC23IP, ASF1A, HECTD1, CNKSR1, ARL14EP, BMP1, IKZF2, PTPN18, KLF12, PTPN4, CD276, TRIM63, AFG3L2, SPRYD7, TRAF3IP1, CORO1B, RNF6, RABEP1, ARMC8, NEDD4, MCPH1, CMYA5, FBXO32, TRIP6, LDOC1, UBE2E2, SEL1L, ATL2, KIAA0368, PHKB, IGFBP7, FOXK2, MITF, COPRS, PHF20, DPH3, UTP11, OS9, ZBTB38, RMND5A, SHC1, GKAP1, RANBP2, GOLGA4, WDR34, NDUFS1, IFNLR1, TFIP11, ARHGEF2, ZCCHC11, SLC25A6, SNAPC3, MPP5, LDB2, MPP7, UBE2B, PPM1F, SENP2, PDIK1L, ANKRD28, BTG1, CD81, CFL1, TXNRD1, PSME4, USP25, KPNA1, PPP2R2A, PREP, YWHAZ, KMT2C, PPM1A, HAT1, NFYB, TCF7L2, ITM2A, ZFP36L1, TFAM, GPHN, RASGRP3, GNPTAB, SHISA5, SLC25A46, COL6A2, TUBA3D, THAP1, CD4, PAFAH1B1, MYO5B, BCAS2, ACTB, UPF2, NOS1, CAP2, AIMP1, CEBPG, APPL1, TAB2, CENPI, IWS1, MSRB3, IRF9, MNAT1, PRELID1, GSPT1, WDR26, CUL4A, FBLN5, APIP, IGFBP3 |
| GOTERM_MF_DIRECT | GO:0004842~ubiquitin-protein transferase activity | 18 | 2.47E-05 | UBR2, ASB14, ZNRF1, TRIM63, UBE2B, FEM1A, ZYG11B, CUL3, RNF6, KBTBD2, RMND5A, NEDD4, RNF168, FBXO32, ASB4, CUL1, UBE2E2, HECTD1 |
| GOTERM_MF_DIRECT | GO:0061630~ubiquitin protein ligase activity | 12 | 2.25E-04 | CUL3, RNF125, RNF6, C18ORF25, CUL4A, NEDD4, UBR2, ASB2, ZNRF1, UBE2B, ASB4, CUL1 |
| GOTERM_MF_DIRECT | GO:0046977~TAP binding | 3 | 7.62E-04 | HLA-A, HLA-C, HLA-B |
| GOTERM_MF_DIRECT | GO:0042605~peptide antigen binding | 5 | 9.82E-04 | HLA-A, HLA-C, HLA-B, HLA-E, HLA-F |
| GOTERM_MF_DIRECT | GO:0016874~ligase activity | 12 | 0.004391607 | RNF125, RNF6, C18ORF25, KCMF1, NEDD4, UBR2, RNF168, RANBP2, TRIM63, ZNRF1, HECTD1, MID2 |
| GOTERM_MF_DIRECT | GO:0003924~GTPase activity | 11 | 0.004664881 | GNAL, TUBB, OPA1, GNAI2, GSPT1, ATL2, TUBA3D, RHOQ, MTIF2, SAR1B, NKIRAS1 |

**Supplementary Table.5 The KEGG analysis of genes in lightgreen module (*p*<0.01)**

| **Category** | **Term** | **Count** | **PValue** | **Genes** |
| --- | --- | --- | --- | --- |
| KEGG_PATHWAY | hsa04145:Phagosome | 11 | 3.28E-04 | ACTB, DYNC1LI1, TUBB, SEC61B, NOS1, HLA-A, TUBA3D, HLA-C, HLA-B, HLA-E, HLA-F |
| KEGG_PATHWAY | hsa04612:Antigen processing and presentation | 8 | 3.87E-04 | HLA-A, HLA-C, NFYB, CD4, HLA-B, HLA-E, CD74, HLA-F |
| KEGG_PATHWAY | hsa05332:Graft-versus-host disease | 5 | 0.002666998 | HLA-A, HLA-C, HLA-B, HLA-E, HLA-F |
| KEGG_PATHWAY | hsa05416:Viral myocarditis | 6 | 0.003356927 | ACTB, HLA-A, HLA-C, HLA-B, HLA-E, HLA-F |
| KEGG_PATHWAY | hsa05330:Allograft rejection | 5 | 0.004074484 | HLA-A, HLA-C, HLA-B, HLA-E, HLA-F |
| KEGG_PATHWAY | hsa05166:HTLV-I infection | 12 | 0.005575168 | TSPO, ADCY2, SLC25A6, TGFB3, HLA-A, PDGFRB, HLA-C, NFYB, HLA-B, HLA-E, ATF1, HLA-F |
| KEGG_PATHWAY | hsa05169:Epstein-Barr virus infection | 8 | 0.00604295 | PSMD12, NEDD4, HLA-A, HLA-C, HLA-B, HLA-E, TAB2, HLA-F |
| KEGG_PATHWAY | hsa04940:Type I diabetes mellitus | 5 | 0.006448139 | HLA-A, HLA-C, HLA-B, HLA-E, HLA-F |

**Supplementary Table.6 The genes ranked by degree of black module using cytoHubba plug-in of Cytoscape)**

| **Gene** | **Degree** | **MCODE_Cluster** | **Betweenness** | **Closeness** |
| --- | --- | --- | --- | --- |
| IL6 | 182 | Cluster 3 | 107376.5513 | 2.92E-04 |
| PTPRC | 157 | Cluster 3 | 40846.25829 | 2.76E-04 |
| ITGAM | 152 | Cluster 2 | 41517.18153 | 2.79E-04 |
| MAPK1 | 144 | Cluster 2 | 124317.3084 | 2.90E-04 |
| CD86 | 127 | Cluster 3 | 16728.92694 | 2.64E-04 |
| ITGB2 | 127 | Cluster 1 | 32923.67969 | 2.69E-04 |
| IL10 | 126 | Cluster 3 | 35161.54618 | 2.68E-04 |
| TYROBP | 126 | Cluster 1 | 26204.13204 | 2.58E-04 |
| CD44 | 115 | Cluster 3 | 47031.85038 | 2.72E-04 |
| TLR2 | 113 | Cluster 2 | 21350.39391 | 2.65E-04 |
| PLEK | 106 | Cluster 1 | 39556.55368 | 2.62E-04 |
| TLR8 | 101 | Cluster 3 | 11989.46368 | 2.56E-04 |
| CDK1 | 100 | Cluster 1 | 33823.41276 | 2.58E-04 |
| LCP2 | 100 | Cluster 2 | 19993.10038 | 2.55E-04 |
| CSF1R | 100 | Cluster 3 | 24224.98921 | 2.60E-04 |
| CXCR4 | 98 | Cluster 3 | 24682.15482 | 2.63E-04 |
| CCL2 | 98 | Cluster 2 | 25209.08803 | 2.68E-04 |
| VCAM1 | 91 | Cluster 3 | 16283.76768 | 2.61E-04 |
| C3AR1 | 90 | Cluster 2 | 11533.28866 | 2.52E-04 |
| CYBB | 89 | Cluster 2 | 19018.25128 | 2.62E-04 |
| IGF1 | 89 | Cluster 6 | 44748.89599 | 2.77E-04 |
| TLR1 | 88 | Cluster 2 | 10469.29086 | 2.59E-04 |
| CDC20 | 87 | Cluster 1 | 19222.85645 | 2.49E-04 |
| CCNB1 | 86 | Cluster 1 | 23282.93646 | 2.56E-04 |
| CSF2 | 85 | Cluster 3 | 11362.34981 | 2.60E-04 |
| LILRB2 | 83 | Cluster 2 | 8194.304795 | 2.45E-04 |
| IL10RA | 80 | Cluster 1 | 3506.376854 | 2.47E-04 |
| GRB2 | 80 | Cluster 17 | 47824.18255 | 2.63E-04 |
| FCGR2B | 80 | Cluster 3 | 3156.154357 | 2.50E-04 |
| IRF8 | 80 | Cluster 2 | 15164.1166 | 2.52E-04 |
| CCNA2 | 78 | Cluster 1 | 15895.99142 | 2.52E-04 |
| SYK | 78 | Cluster 3 | 18062.89054 | 2.56E-04 |
| RAC2 | 78 | Cluster 4 | 41899.71363 | 2.61E-04 |
| CCR1 | 78 | Cluster 2 | 5235.414035 | 2.48E-04 |
| HCK | 78 | Cluster 2 | 11015.23735 | 2.52E-04 |
| MAD2L1 | 77 | Cluster 1 | 18222.28913 | 2.39E-04 |
| BTK | 77 | Cluster 4 | 12507.98909 | 2.52E-04 |
| FCGR2A | 77 | Cluster 3 | 6499.108659 | 2.48E-04 |
| CD53 | 77 | Cluster 2 | 6240.224445 | 2.51E-04 |
| CCL4 | 76 | Cluster 2 | 4416.54386 | 2.50E-04 |
| CXCL12 | 75 | Cluster 3 | 10092.27591 | 2.60E-04 |
| APOE | 75 | Cluster 4 | 46566.06833 | 2.55E-04 |
| FOXP3 | 75 | Cluster 2 | 13339.64829 | 2.55E-04 |
| NCAM1 | 74 | Cluster 3 | 25087.47494 | 2.53E-04 |
| CSF2RB | 73 | Cluster 2 | 8467.355428 | 2.46E-04 |
| UBE2C | 72 | Cluster 1 | 14597.12672 | 2.50E-04 |
| FCER1G | 72 | Cluster 2 | 5445.652152 | 2.45E-04 |
| CD163 | 72 | Cluster 4 | 4178.785745 | 2.39E-04 |
| C1QB | 70 | Cluster 2 | 5248.317379 | 2.39E-04 |
| WAS | 70 | Cluster 4 | 26011.43584 | 2.50E-04 |
| DYNLL1 | 70 | Cluster 3 | 38655.48721 | 2.51E-04 |
| BUB1B | 68 | Cluster 1 | 4299.167082 | 2.35E-04 |
| C1QA | 68 | Cluster 2 | 4728.48821 | 2.38E-04 |
| RACGAP1 | 68 | Cluster 1 | 14779.85517 | 2.46E-04 |
| LYN | 68 | Cluster 4 | 17777.17719 | 2.62E-04 |
| CTSS | 68 | Cluster 2 | 6809.91684 | 2.43E-04 |
| AIF1 | 68 | Cluster 2 | 10618.88086 | 2.52E-04 |
| COL1A1 | 67 | Cluster 3 | 22682.65659 | 2.52E-04 |
| LAPTM5 | 67 | Cluster 2 | 4843.858568 | 2.41E-04 |
| KIF20A | 66 | Cluster 1 | 10417.77211 | 2.41E-04 |
| HLA-DRB1 | 65 |  | 10904.18159 | 2.53E-04 |
| LY86 | 65 | Cluster 2 | 2457.441838 | 2.39E-04 |
| CD33 | 65 | Cluster 4 | 5769.42465 | 2.49E-04 |
| HLA-DRA | 64 | Cluster 3 | 12781.60246 | 2.52E-04 |
| PCNA | 64 | Cluster 1 | 18901.92203 | 2.37E-04 |
| TOP2A | 64 | Cluster 1 | 14459.81115 | 2.42E-04 |
| CCT2 | 63 | Cluster 2 | 34609.27024 | 2.54E-04 |
| MYD88 | 63 | Cluster 3 | 9924.979264 | 2.55E-04 |
| THBS1 | 63 | Cluster 6 | 29615.57121 | 2.58E-04 |
| MRC1 | 62 | Cluster 3 | 7013.131022 | 2.41E-04 |
| WDFY4 | 62 | Cluster 3 | 22979.80662 | 2.42E-04 |
| COL1A2 | 61 | Cluster 3 | 15614.77215 | 2.46E-04 |
| TIMP1 | 61 | Cluster 26 | 12904.38469 | 2.54E-04 |
| CDC6 | 60 | Cluster 1 | 2487.001008 | 2.32E-04 |
| SKP2 | 60 | Cluster 2 | 17654.73446 | 2.43E-04 |
| BIRC5 | 60 | Cluster 1 | 9012.199109 | 2.41E-04 |
| SPP1 | 60 | Cluster 26 | 13317.16472 | 2.58E-04 |
| C5AR1 | 59 | Cluster 3 | 3864.608886 | 2.42E-04 |
| CDKN1A | 58 | Cluster 6 | 23732.23377 | 2.55E-04 |
| FYB | 58 | Cluster 3 | 2129.705358 | 2.42E-04 |
| CD14 | 58 | Cluster 3 | 7106.186096 | 2.39E-04 |
| TYMS | 58 | Cluster 1 | 24548.74071 | 2.35E-04 |
| C1QC | 57 | Cluster 3 | 8364.44931 | 2.38E-04 |
| TPX2 | 57 | Cluster 1 | 10493.59896 | 2.33E-04 |
| CD69 | 57 | Cluster 3 | 1361.490394 | 2.42E-04 |
| RBX1 | 56 | Cluster 2 | 20161.08422 | 2.38E-04 |
| RRM2 | 56 | Cluster 1 | 15133.57077 | 2.47E-04 |
| COL3A1 | 55 | Cluster 3 | 13748.51387 | 2.42E-04 |
| JAK2 | 55 | Cluster 4 | 17337.32616 | 2.60E-04 |
| SOCS3 | 55 | Cluster 2 | 19298.73529 | 2.54E-04 |
| CD48 | 55 | Cluster 2 | 1571.993185 | 2.37E-04 |
| DOCK2 | 54 | Cluster 3 | 6973.085074 | 2.42E-04 |
| H2AFZ | 54 |  | 20486.10858 | 2.38E-04 |
| TLR5 | 54 | Cluster 2 | 3289.955169 | 2.48E-04 |
| TNFRSF1B | 53 | Cluster 17 | 2769.241733 | 2.39E-04 |
| LCP1 | 53 | Cluster 18 | 12986.79799 | 2.46E-04 |
| IL7 | 53 | Cluster 3 | 1983.586288 | 2.40E-04 |
| PTTG1 | 52 | Cluster 1 | 7725.052293 | 2.50E-04 |
| ZWINT | 52 | Cluster 1 | 7590.851245 | 2.31E-04 |
| MCM6 | 52 | Cluster 1 | 4622.017914 | 2.28E-04 |
| TTK | 52 | Cluster 1 | 3745.278378 | 2.30E-04 |
| PRC1 | 52 | Cluster 1 | 1861.597384 | 2.26E-04 |
| NCF2 | 51 | Cluster 2 | 3166.234231 | 2.43E-04 |
| NCF4 | 51 | Cluster 3 | 2151.128026 | 2.38E-04 |
| FBXW7 | 51 | Cluster 2 | 23992.85206 | 2.50E-04 |
| CENPF | 50 | Cluster 1 | 4338.454154 | 2.29E-04 |
| CKAP5 | 50 | Cluster 3 | 7093.278173 | 2.27E-04 |
| BGN | 50 | Cluster 17 | 25100.82797 | 2.44E-04 |
| ACTR10 | 50 | Cluster 2 | 15323.92268 | 2.43E-04 |
| MCM5 | 49 | Cluster 1 | 1927.66909 | 2.29E-04 |
| DLGAP5 | 49 | Cluster 1 | 6829.495241 | 2.28E-04 |
| LAMB1 | 49 | Cluster 6 | 11442.49749 | 2.47E-04 |
| KPNA2 | 49 | Cluster 1 | 17396.64886 | 2.33E-04 |
| HCLS1 | 49 | Cluster 4 | 3006.880268 | 2.38E-04 |
| DYNC1I1 | 48 | Cluster 3 | 8945.653937 | 2.32E-04 |
| HSPG2 | 48 | Cluster 17 | 17053.12539 | 2.40E-04 |
| SMAD4 | 48 | Cluster 8 | 24368.90683 | 2.53E-04 |
| KIF2A | 48 | Cluster 3 | 11368.98986 | 2.30E-04 |
| CD93 | 48 | Cluster 3 | 10323.58081 | 2.41E-04 |
| CDC23 | 47 | Cluster 2 | 9220.878637 | 2.41E-04 |
| HLA-DPA1 | 47 | Cluster 3 | 4706.133761 | 2.44E-04 |
| EGR1 | 47 |  | 20121.88465 | 2.51E-04 |
| CD300A | 47 | Cluster 2 | 6282.750234 | 2.37E-04 |
| PRKCA | 47 |  | 24829.17932 | 2.57E-04 |
| UBE2S | 46 | Cluster 2 | 9028.429834 | 2.36E-04 |
| IRF7 | 46 | Cluster 23 | 4050.960136 | 2.41E-04 |
| THY1 | 46 | Cluster 3 | 7611.906899 | 2.43E-04 |
| HLA-DQB1 | 46 | Cluster 3 | 5965.417653 | 2.44E-04 |
| PF4 | 46 | Cluster 3 | 5972.666022 | 2.40E-04 |
| CEP55 | 46 | Cluster 1 | 6155.526854 | 2.39E-04 |
| LOX | 46 | Cluster 17 | 12299.77591 | 2.45E-04 |
| VAMP8 | 46 | Cluster 3 | 13106.40212 | 2.45E-04 |
| PLAU | 45 | Cluster 3 | 13663.54579 | 2.53E-04 |
| HSPA5 | 45 | Cluster 8 | 32720.4228 | 2.56E-04 |
| PBK | 45 | Cluster 1 | 3857.091479 | 2.23E-04 |
| COL5A1 | 45 | Cluster 3 | 8778.519315 | 2.34E-04 |
| MELK | 45 | Cluster 1 | 3403.029918 | 2.27E-04 |
| VSIG4 | 45 | Cluster 17 | 5390.491623 | 2.37E-04 |
| CD2 | 45 | Cluster 4 | 1970.975109 | 2.39E-04 |
| IRF5 | 45 | Cluster 3 | 2986.227873 | 2.39E-04 |
| CKAP4 | 45 | Cluster 3 | 22697.07904 | 2.49E-04 |
| LGALS3 | 45 |  | 19065.64318 | 2.49E-04 |
| CCNA1 | 44 | Cluster 1 | 5644.530652 | 2.25E-04 |
| COL4A1 | 44 | Cluster 3 | 4527.140511 | 2.32E-04 |
| COL6A1 | 44 | Cluster 3 | 7892.109861 | 2.29E-04 |
| KIF20B | 44 | Cluster 1 | 2599.708511 | 2.21E-04 |
| COL6A3 | 44 | Cluster 3 | 5143.570533 | 2.30E-04 |
| LYZ | 44 | Cluster 2 | 8529.859227 | 2.46E-04 |
| CD38 | 44 | Cluster 3 | 4945.011523 | 2.38E-04 |
| TRIP13 | 43 | Cluster 1 | 5440.650789 | 2.25E-04 |
| LAMC1 | 43 | Cluster 4 | 9688.536367 | 2.42E-04 |
| DTL | 43 | Cluster 1 | 3209.547856 | 2.27E-04 |
| ANLN | 43 | Cluster 1 | 11147.1891 | 2.34E-04 |
| COL2A1 | 43 | Cluster 3 | 8436.985471 | 2.33E-04 |
| SIGLEC1 | 43 | Cluster 3 | 1338.787382 | 2.29E-04 |
| SPARC | 42 | Cluster 4 | 10133.31699 | 2.36E-04 |
| CTSA | 42 | Cluster 2 | 11651.99733 | 2.36E-04 |
| CD52 | 42 | Cluster 4 | 1831.616416 | 2.32E-04 |
| FGL2 | 42 | Cluster 3 | 2755.507942 | 2.34E-04 |
| CDC7 | 41 | Cluster 1 | 1560.966282 | 2.26E-04 |
| DNMT1 | 41 |  | 17998.63083 | 2.47E-04 |
| IL3RA | 41 | Cluster 3 | 2987.620917 | 2.38E-04 |
| UBE3A | 41 | Cluster 2 | 22666.68977 | 2.33E-04 |
| RAD51AP1 | 41 | Cluster 1 | 2200.915862 | 2.21E-04 |
| MS4A6A | 41 | Cluster 4 | 4034.718807 | 2.28E-04 |
| MYO1F | 41 | Cluster 18 | 2844.340289 | 2.33E-04 |
| MPEG1 | 41 | Cluster 2 | 533.9850614 | 2.32E-04 |
| ACTR3 | 40 | Cluster 4 | 9305.952004 | 2.38E-04 |
| PLAUR | 40 | Cluster 3 | 4779.253796 | 2.47E-04 |
| UHRF1 | 40 | Cluster 1 | 1736.439414 | 2.24E-04 |
| STMN1 | 40 | Cluster 3 | 11615.29361 | 2.38E-04 |
| SRGN | 40 | Cluster 4 | 12075.47528 | 2.45E-04 |
| CYTH4 | 40 | Cluster 3 | 13192.19845 | 2.29E-04 |
| COL4A2 | 39 | Cluster 3 | 3153.104629 | 2.29E-04 |
| PTPN22 | 39 | Cluster 17 | 6547.065333 | 2.41E-04 |
| PYCARD | 39 | Cluster 2 | 5341.839178 | 2.42E-04 |
| DDOST | 38 |  | 22222.4845 | 2.37E-04 |
| ALOX5AP | 38 | Cluster 3 | 7998.286306 | 2.33E-04 |
| KIF14 | 38 | Cluster 1 | 3745.061051 | 2.22E-04 |
| CDCA3 | 38 | Cluster 1 | 1722.049971 | 2.21E-04 |
| SOD2 | 38 | Cluster 8 | 14962.18523 | 2.46E-04 |
| CNR1 | 38 | Cluster 3 | 11312.64572 | 2.42E-04 |
| MBP | 38 |  | 16051.41429 | 2.51E-04 |
| COL5A2 | 37 | Cluster 3 | 3470.149391 | 2.18E-04 |
| HLA-DPB1 | 37 | Cluster 3 | 2379.641763 | 2.38E-04 |
| HCST | 37 | Cluster 4 | 1364.206845 | 2.29E-04 |
| ARRB2 | 37 | Cluster 4 | 13077.83319 | 2.39E-04 |
| CXCL16 | 37 | Cluster 3 | 1339.879112 | 2.32E-04 |
| GRN | 37 | Cluster 2 | 8966.722619 | 2.41E-04 |
| BIN2 | 37 | Cluster 4 | 7482.295686 | 2.30E-04 |
| PENK | 37 | Cluster 3 | 6070.28438 | 2.35E-04 |
| HIF1A | 36 | Cluster 6 | 14778.62857 | 2.53E-04 |
| GNG11 | 36 | Cluster 3 | 6205.802172 | 2.34E-04 |
| MAP3K5 | 36 | Cluster 8 | 19855.52503 | 2.46E-04 |
| HPGDS | 36 | Cluster 19 | 17225.09225 | 2.52E-04 |
| CTSC | 36 | Cluster 2 | 5959.946616 | 2.38E-04 |
| ENO1 | 36 | Cluster 8 | 13652.51605 | 2.43E-04 |
| RPS8 | 35 | Cluster 8 | 7897.897246 | 2.22E-04 |
| YWHAG | 35 | Cluster 17 | 16537.36074 | 2.47E-04 |
| CD83 | 35 | Cluster 3 | 4003.413152 | 2.30E-04 |
| PARVG | 35 | Cluster 4 | 5473.324587 | 2.28E-04 |
| TNFAIP3 | 35 | Cluster 17 | 11278.45143 | 2.35E-04 |
| SASH3 | 35 | Cluster 4 | 540.3057166 | 2.28E-04 |
| CCND2 | 34 | Cluster 6 | 9221.819947 | 2.37E-04 |
| WEE1 | 34 | Cluster 4 | 2603.442104 | 2.33E-04 |
| HAVCR2 | 34 | Cluster 3 | 675.9121612 | 2.32E-04 |
| PPIB | 34 | Cluster 3 | 14572.61403 | 2.34E-04 |
| CLEC7A | 34 | Cluster 3 | 845.8905806 | 2.32E-04 |
| NPC2 | 34 | Cluster 2 | 7624.232515 | 2.35E-04 |
| S1PR1 | 34 | Cluster 3 | 7495.812427 | 2.42E-04 |
| CLTA | 34 | Cluster 4 | 10367.65829 | 2.33E-04 |
| ADORA3 | 34 | Cluster 3 | 2015.892623 | 2.31E-04 |
| PRKCB | 34 |  | 9785.947535 | 2.48E-04 |
| LPAR1 | 34 | Cluster 3 | 8648.110245 | 2.23E-04 |
| CORO1A | 34 | Cluster 4 | 3122.41188 | 2.35E-04 |
| PLK2 | 34 | Cluster 3 | 2458.574815 | 2.21E-04 |
| SNAI2 | 34 | Cluster 22 | 7787.612354 | 2.40E-04 |
| TUBA1A | 33 |  | 5304.151751 | 2.32E-04 |
| ALOX5 | 33 | Cluster 17 | 3361.513682 | 2.39E-04 |
| PPP2R5A | 33 | Cluster 3 | 14109.40951 | 2.36E-04 |
| EZR | 33 |  | 14033.00071 | 2.47E-04 |
| GUSB | 33 | Cluster 2 | 6768.010903 | 2.31E-04 |
| TEK | 33 | Cluster 4 | 9739.253904 | 2.40E-04 |
| RAP2B | 33 | Cluster 3 | 5501.222737 | 2.41E-04 |
| CD63 | 33 |  | 11074.78113 | 2.38E-04 |
| FPR3 | 33 | Cluster 3 | 598.8667587 | 2.25E-04 |
| ARPC3 | 32 | Cluster 4 | 10719.82498 | 2.30E-04 |
| RPS15 | 32 | Cluster 8 | 8016.671072 | 2.20E-04 |
| RPS18 | 32 | Cluster 8 | 10180.47936 | 2.29E-04 |
| TUBA1B | 32 |  | 6182.255682 | 2.32E-04 |
| FGF23 | 32 | Cluster 4 | 6842.401874 | 2.44E-04 |
| BST2 | 32 |  | 5876.653023 | 2.34E-04 |
| SELPLG | 32 |  | 9684.990829 | 2.30E-04 |
| RHOJ | 32 | Cluster 28 | 14199.60837 | 2.34E-04 |
| SNRPF | 31 | Cluster 6 | 16543.03397 | 2.26E-04 |
| EVI2B | 31 | Cluster 4 | 630.4832392 | 2.26E-04 |
| FBXL7 | 31 | Cluster 2 | 7722.115598 | 2.21E-04 |
| LAMA4 | 31 | Cluster 4 | 3470.468111 | 2.21E-04 |
| HMHA1 | 31 | Cluster 2 | 4542.925464 | 2.32E-04 |
| ADCY7 | 31 | Cluster 3 | 9899.634802 | 2.26E-04 |
| ATP8A1 | 31 | Cluster 3 | 6163.817205 | 2.29E-04 |
| RNASE6 | 31 | Cluster 4 | 1806.330497 | 2.23E-04 |
| RPL22 | 30 | Cluster 8 | 8471.704015 | 2.22E-04 |
| RPL26L1 | 30 | Cluster 8 | 5889.85897 | 2.18E-04 |
| MSR1 | 30 | Cluster 17 | 2869.062858 | 2.34E-04 |
| ACTC1 | 30 | Cluster 9 | 16134.68956 | 2.30E-04 |
| UBA7 | 30 | Cluster 2 | 3423.052581 | 2.27E-04 |
| LAIR1 | 30 | Cluster 3 | 676.1798513 | 2.30E-04 |
| SLA | 30 | Cluster 18 | 183.1866096 | 2.24E-04 |
| COL15A1 | 30 | Cluster 3 | 8011.663564 | 2.17E-04 |
| IFI30 | 30 | Cluster 23 | 4483.888484 | 2.27E-04 |
| RGS18 | 30 | Cluster 3 | 848.1056987 | 2.26E-04 |
| PTPRJ | 30 | Cluster 3 | 925.5679559 | 2.38E-04 |
| CCL18 | 30 | Cluster 17 | 829.1488222 | 2.23E-04 |
| MARCO | 30 | Cluster 4 | 1009.396801 | 2.21E-04 |
| RPL18 | 29 | Cluster 8 | 3403.769708 | 2.15E-04 |
| DMD | 29 | Cluster 6 | 11604.10325 | 2.34E-04 |
| TUBA1C | 29 | Cluster 7 | 2419.319838 | 2.26E-04 |
| GALNS | 29 | Cluster 2 | 4404.276657 | 2.31E-04 |
| CTSL | 29 |  | 7747.72558 | 2.34E-04 |
| CAMP | 29 |  | 1578.439242 | 2.36E-04 |
| CECR1 | 29 | Cluster 2 | 7299.237539 | 2.29E-04 |
| FTL | 29 | Cluster 2 | 4031.658992 | 2.28E-04 |
| MYO1E | 29 | Cluster 6 | 11094.70045 | 2.33E-04 |
| EEF1A1 | 28 |  | 9191.769396 | 2.34E-04 |
| LY96 | 28 | Cluster 17 | 7468.664512 | 2.34E-04 |
| HIST1H4A | 28 | Cluster 6 | 8563.900413 | 2.34E-04 |
| P4HA2 | 28 | Cluster 3 | 7727.714999 | 2.09E-04 |
| ARHGAP30 | 28 | Cluster 18 | 3295.591297 | 2.22E-04 |
| HPRT1 | 28 |  | 16181.95228 | 2.46E-04 |
| CENPW | 28 |  | 1620.06858 | 2.25E-04 |
| PROM1 | 28 | Cluster 4 | 4738.123831 | 2.39E-04 |
| MS4A4A | 28 |  | 816.5338896 | 2.21E-04 |
| ARPC5 | 27 | Cluster 4 | 4373.634389 | 2.20E-04 |
| TUBB2A | 27 | Cluster 7 | 7690.219555 | 2.27E-04 |
| CDC25B | 27 | Cluster 4 | 1690.997503 | 2.31E-04 |
| CR1 | 27 |  | 4676.421287 | 2.26E-04 |
| RMI2 | 27 | Cluster 1 | 676.7963953 | 2.16E-04 |
| DRD3 | 27 | Cluster 3 | 6616.251727 | 2.28E-04 |
| CST3 | 27 | Cluster 4 | 5609.261565 | 2.31E-04 |
| FUCA1 | 27 | Cluster 2 | 4729.480739 | 2.26E-04 |
| COL14A1 | 27 | Cluster 3 | 940.2011415 | 2.18E-04 |
| RLIM | 27 | Cluster 2 | 6855.782245 | 2.19E-04 |
| STAB1 | 27 | Cluster 4 | 1031.985972 | 2.20E-04 |
| TGFBI | 27 | Cluster 17 | 11731.73725 | 2.33E-04 |
| FCGR1B | 27 | Cluster 23 | 662.5745464 | 2.26E-04 |
| LPHN1 | 27 |  | 28533.58033 | 2.15E-04 |
| TNFRSF9 | 27 | Cluster 4 | 1097.462244 | 2.30E-04 |
| SLC2A4 | 27 |  | 16074.20592 | 2.40E-04 |
| UBQLN1 | 27 |  | 12914.14347 | 2.26E-04 |
| WIPF1 | 26 |  | 4834.984849 | 2.23E-04 |
| CSF2RA | 26 |  | 7818.409604 | 2.32E-04 |
| RPL22L1 | 26 | Cluster 10 | 2464.116059 | 2.10E-04 |
| PTBP1 | 26 | Cluster 6 | 15384.14413 | 2.23E-04 |
| NIP7 | 26 | Cluster 11 | 6354.999308 | 2.00E-04 |
| UNG | 26 |  | 7289.514472 | 2.32E-04 |
| MAN2B1 | 26 | Cluster 2 | 3993.97833 | 2.25E-04 |
| IL4R | 26 | Cluster 4 | 273.0391249 | 2.31E-04 |
| SMAD7 | 26 |  | 5080.284823 | 2.38E-04 |
| SYNJ2 | 26 | Cluster 4 | 4793.83359 | 2.20E-04 |
| RCC2 | 26 | Cluster 3 | 8262.631757 | 2.23E-04 |
| GNS | 26 | Cluster 2 | 1836.693308 | 2.27E-04 |
| GAD1 | 26 |  | 9060.111917 | 2.37E-04 |
| RNASET2 | 26 | Cluster 2 | 1545.940077 | 2.27E-04 |
| TRIM9 | 26 | Cluster 2 | 9293.306742 | 2.20E-04 |
| FABP5 | 26 | Cluster 2 | 1006.839982 | 2.32E-04 |
| CMTM6 | 26 | Cluster 3 | 6141.422449 | 2.25E-04 |
| HEBP2 | 26 | Cluster 2 | 4308.62136 | 2.26E-04 |
| RPN2 | 25 |  | 14759.00323 | 2.17E-04 |
| LGALS9 | 25 |  | 961.7748077 | 2.33E-04 |
| LEPRE1 | 25 | Cluster 3 | 1527.464323 | 2.10E-04 |
| FGFR2 | 25 | Cluster 25 | 3976.765751 | 2.37E-04 |
| GM2A | 25 | Cluster 2 | 2561.634566 | 2.27E-04 |
| ACTL6A | 25 |  | 14962.66881 | 2.41E-04 |
| ITGB8 | 25 | Cluster 6 | 3516.334414 | 2.25E-04 |
| ADAMTS2 | 25 |  | 3947.857796 | 2.07E-04 |
| P4HA1 | 25 | Cluster 3 | 6709.026726 | 2.05E-04 |
| KIF3C | 25 | Cluster 3 | 1825.873587 | 2.14E-04 |
| UNKL | 25 | Cluster 2 | 5085.042786 | 2.19E-04 |
| TSLP | 25 | Cluster 4 | 175.0729816 | 2.25E-04 |
| CSPG4 | 24 | Cluster 12 | 6625.087228 | 2.22E-04 |
| SMC1A | 24 | Cluster 3 | 1025.222639 | 2.15E-04 |
| SH3GL1 | 24 | Cluster 4 | 1964.218921 | 2.25E-04 |
| VDR | 24 |  | 6631.840467 | 2.39E-04 |
| UBE2Z | 24 | Cluster 2 | 2460.950047 | 2.22E-04 |
| KIF26A | 24 | Cluster 3 | 3890.305326 | 2.23E-04 |
| GPR65 | 24 | Cluster 5 | 5132.305495 | 2.19E-04 |
| RNF34 | 24 | Cluster 2 | 3482.545695 | 2.17E-04 |
| CREG1 | 24 | Cluster 2 | 966.8060502 | 2.29E-04 |
| ASB9 | 24 | Cluster 2 | 4365.299937 | 2.17E-04 |
| RNF115 | 24 | Cluster 2 | 2993.135759 | 2.20E-04 |
| PLAC8 | 24 | Cluster 2 | 458.8457173 | 2.24E-04 |
| PSME2 | 24 | Cluster 17 | 2090.481905 | 2.28E-04 |
| P2RY8 | 24 |  | 2979.349788 | 2.24E-04 |
| ARPC1B | 23 | Cluster 6 | 4318.804222 | 2.33E-04 |
| SNRPD2 | 23 | Cluster 6 | 5854.766098 | 2.15E-04 |
| PIK3CG | 23 |  | 3051.377402 | 2.37E-04 |
| SAMHD1 | 23 |  | 6736.446325 | 2.29E-04 |
| NME1 | 23 | Cluster 8 | 6523.716718 | 2.35E-04 |
| EPS15L1 | 23 | Cluster 4 | 2157.112685 | 2.25E-04 |
| DEGS1 | 23 | Cluster 3 | 2808.798167 | 2.29E-04 |
| COL6A6 | 23 | Cluster 3 | 525.4305667 | 2.15E-04 |
| COL5A3 | 23 | Cluster 3 | 1513.18834 | 2.13E-04 |
| FBXO40 | 23 | Cluster 2 | 1437.007659 | 2.19E-04 |
| GADD45B | 23 |  | 3970.489685 | 2.38E-04 |
| RGS1 | 23 | Cluster 17 | 790.5800738 | 2.25E-04 |
| FBXL22 | 23 | Cluster 2 | 3824.525687 | 2.16E-04 |
| CASP7 | 23 |  | 7019.718243 | 2.37E-04 |
| MFGE8 | 23 | Cluster 4 | 3556.134207 | 2.28E-04 |
| XCL1 | 23 | Cluster 17 | 1078.645295 | 2.20E-04 |
| RNF114 | 23 | Cluster 2 | 1146.774942 | 2.17E-04 |
| CDK18 | 23 | Cluster 4 | 2439.445101 | 2.10E-04 |
| PRDM1 | 23 |  | 2258.827566 | 2.32E-04 |
| GMFG | 23 | Cluster 18 | 363.9133117 | 2.24E-04 |
| DCAF13 | 22 | Cluster 11 | 6808.094893 | 2.02E-04 |
| HLA-DMB | 22 | Cluster 3 | 931.1863262 | 2.25E-04 |
| KCNQ1 | 22 |  | 10195.56873 | 2.06E-04 |
| PCOLCE | 22 |  | 1882.460634 | 2.10E-04 |
| KDM6A | 22 | Cluster 21 | 4671.434468 | 2.17E-04 |
| GNA15 | 22 | Cluster 5 | 2515.626292 | 2.23E-04 |
| DOK2 | 22 |  | 901.3684007 | 2.21E-04 |
| PLOD3 | 22 | Cluster 3 | 6898.388987 | 2.01E-04 |
| LIMK1 | 22 |  | 8404.597296 | 2.17E-04 |
| CCL8 | 22 |  | 45.88006504 | 2.20E-04 |
| FGB | 22 | Cluster 6 | 2292.122832 | 2.39E-04 |
| ATP5A1 | 22 |  | 8987.020348 | 2.22E-04 |
| COL20A1 | 22 | Cluster 3 | 6129.634797 | 2.03E-04 |
| RCN1 | 22 | Cluster 4 | 14797.30613 | 2.35E-04 |
| LONRF1 | 22 | Cluster 2 | 423.6413727 | 2.18E-04 |
| FOLR2 | 22 | Cluster 17 | 3824.937862 | 2.16E-04 |
| CDK15 | 22 | Cluster 4 | 1229.281441 | 2.10E-04 |
| KCNA1 | 22 |  | 7426.389314 | 2.07E-04 |
| ERBB3 | 21 | Cluster 25 | 6031.45901 | 2.34E-04 |
| MAPRE2 | 21 | Cluster 7 | 2144.592413 | 2.09E-04 |
| CLASP2 | 21 | Cluster 3 | 463.5967857 | 2.17E-04 |
| HIST1H4J | 21 | Cluster 6 | 2353.231349 | 2.21E-04 |
| HIST1H4H | 21 | Cluster 6 | 2353.231349 | 2.21E-04 |
| MYH11 | 21 | Cluster 9 | 9534.713875 | 2.22E-04 |
| ARHGAP9 | 21 | Cluster 18 | 1714.660228 | 2.34E-04 |
| GAL | 21 | Cluster 3 | 3751.463361 | 2.20E-04 |
| KDELR3 | 21 |  | 4657.241082 | 2.23E-04 |
| DIAPH1 | 21 |  | 10117.6122 | 2.23E-04 |
| DOCK8 | 21 |  | 5785.587398 | 2.26E-04 |
| CLEC4A | 21 |  | 39.27247035 | 2.14E-04 |
| ELMO1 | 20 | Cluster 28 | 8970.724858 | 2.20E-04 |
| HLA-DMA | 20 | Cluster 3 | 354.5381214 | 2.22E-04 |
| BLNK | 20 |  | 2751.874312 | 2.30E-04 |
| TUBB2B | 20 | Cluster 7 | 1951.835012 | 2.11E-04 |
| DAG1 | 20 | Cluster 6 | 7494.278186 | 2.23E-04 |
| IFIT1 | 20 |  | 828.9738428 | 2.22E-04 |
| ERBB4 | 20 | Cluster 25 | 8712.764252 | 2.36E-04 |
| TNFRSF8 | 20 |  | 1066.73843 | 2.23E-04 |
| PAK3 | 20 | Cluster 6 | 4768.790063 | 2.30E-04 |
| PTCH1 | 20 |  | 8814.027572 | 2.28E-04 |
| TIAM1 | 20 |  | 2444.802278 | 2.28E-04 |
| FSCN1 | 20 | Cluster 9 | 4605.259396 | 2.30E-04 |
| ITGA10 | 20 | Cluster 6 | 835.215839 | 2.20E-04 |
| AGFG1 | 20 | Cluster 4 | 6590.295985 | 2.09E-04 |
| STAM | 20 | Cluster 4 | 2280.483443 | 2.23E-04 |
| TRIM5 | 20 |  | 2616.431708 | 2.21E-04 |
| TNC | 20 | Cluster 4 | 1245.747231 | 2.23E-04 |
| APLNR | 20 | Cluster 3 | 149.7613729 | 2.19E-04 |
| SPON1 | 20 | Cluster 6 | 5675.031469 | 2.16E-04 |
| ATP6AP2 | 20 |  | 5106.291334 | 2.25E-04 |
| STK10 | 20 | Cluster 3 | 1383.481969 | 2.22E-04 |
| TNFRSF14 | 19 | Cluster 24 | 2037.911784 | 2.15E-04 |
| MIS12 | 19 | Cluster 3 | 370.1536866 | 2.16E-04 |
| HK1 | 19 |  | 9717.820669 | 2.35E-04 |
| GPX7 | 19 | Cluster 19 | 4334.181503 | 2.28E-04 |
| ITPA | 19 |  | 6736.971914 | 2.18E-04 |
| CETN2 | 19 | Cluster 17 | 3512.161612 | 2.16E-04 |
| MOV10 | 19 | Cluster 27 | 4199.784053 | 2.16E-04 |
| GNA14 | 19 | Cluster 5 | 3241.105452 | 2.15E-04 |
| AJUBA | 19 | Cluster 17 | 2276.038984 | 2.28E-04 |
| GCLC | 19 | Cluster 19 | 3066.801089 | 2.14E-04 |
| BCL10 | 19 |  | 1917.183045 | 2.28E-04 |
| GAPVD1 | 19 | Cluster 4 | 4488.853067 | 2.13E-04 |
| TMED9 | 19 |  | 3963.069079 | 2.20E-04 |
| ACP5 | 19 |  | 3273.226821 | 2.38E-04 |
| C1orf162 | 19 |  | 724.2303415 | 2.15E-04 |
| PPP2R2C | 19 |  | 6093.004055 | 2.14E-04 |
| MIF | 19 |  | 2941.018102 | 2.40E-04 |
| CD200 | 18 |  | 134.1015893 | 2.26E-04 |
| BTLA | 18 | Cluster 24 | 112.4181086 | 2.10E-04 |
| PNO1 | 18 | Cluster 11 | 1847.179117 | 1.91E-04 |
| EIF3D | 18 |  | 3458.175608 | 2.12E-04 |
| NID2 | 18 | Cluster 4 | 2335.513544 | 2.06E-04 |
| SHC2 | 18 |  | 8381.111953 | 2.21E-04 |
| GPC4 | 18 | Cluster 13 | 7959.433436 | 2.22E-04 |
| USP9X | 18 |  | 8142.58798 | 2.24E-04 |
| DAB2 | 18 | Cluster 4 | 1845.559261 | 2.29E-04 |
| KMT2B | 18 | Cluster 21 | 5313.466893 | 2.17E-04 |
| LAMB3 | 18 | Cluster 6 | 4154.275071 | 2.18E-04 |
| RUNX3 | 18 |  | 4040.182704 | 2.27E-04 |
| ADAM12 | 18 |  | 5030.533318 | 2.22E-04 |
| LYVE1 | 18 |  | 1553.630128 | 2.19E-04 |
| GAR1 | 18 | Cluster 11 | 3120.000345 | 1.99E-04 |
| INADL | 18 |  | 7567.067504 | 2.20E-04 |
| MS4A14 | 18 | Cluster 16 | 5600.969105 | 2.08E-04 |
| SLC7A7 | 18 |  | 10089.25101 | 2.12E-04 |
| CD70 | 18 |  | 694.6349652 | 2.24E-04 |
| CD200R1 | 17 |  | 52.46451187 | 2.22E-04 |
| OBFC1 | 17 |  | 4008.300845 | 2.07E-04 |
| C4B | 17 |  | 4229.19305 | 2.25E-04 |
| TUBB6 | 17 | Cluster 7 | 1579.325762 | 2.13E-04 |
| ACTR3B | 17 | Cluster 6 | 882.8236041 | 2.11E-04 |
| HK2 | 17 |  | 3213.261582 | 2.13E-04 |
| TIRAP | 17 | Cluster 17 | 280.3393255 | 2.29E-04 |
| ARHGEF6 | 17 | Cluster 6 | 2317.228912 | 2.14E-04 |
| PLXNA1 | 17 |  | 3877.46516 | 2.14E-04 |
| TSC1 | 17 |  | 5339.804092 | 2.37E-04 |
| EGR2 | 17 | Cluster 8 | 2142.244516 | 2.21E-04 |
| NME7 | 17 |  | 3780.217945 | 2.18E-04 |
| DDX39A | 17 |  | 5436.28569 | 2.14E-04 |
| P2RX7 | 17 |  | 755.921927 | 2.21E-04 |
| SNX18 | 17 | Cluster 4 | 1965.244163 | 2.17E-04 |
| KIF6 | 17 | Cluster 7 | 4325.123588 | 2.00E-04 |
| CNDP2 | 17 |  | 4896.508463 | 2.21E-04 |
| TRIM29 | 17 |  | 4284.222295 | 2.18E-04 |
| DCX | 17 |  | 2339.455982 | 2.23E-04 |
| MSX1 | 17 | Cluster 22 | 2045.129711 | 2.07E-04 |
| ADAP2 | 17 |  | 2192.605348 | 2.12E-04 |
| AOAH | 17 |  | 50.89453614 | 2.17E-04 |
| CFLAR | 17 |  | 2729.501199 | 2.34E-04 |
| KCND2 | 17 |  | 5479.793397 | 2.17E-04 |
| DOCK1 | 16 | Cluster 28 | 2086.903759 | 2.21E-04 |
| CIRH1A | 16 | Cluster 8 | 3360.434287 | 1.94E-04 |
| CSTF3 | 16 | Cluster 6 | 6388.507417 | 2.01E-04 |
| HLA-DOA | 16 | Cluster 3 | 200.8045225 | 2.13E-04 |
| PIK3R5 | 16 |  | 1590.329993 | 2.21E-04 |
| SERPINE2 | 16 |  | 2896.351186 | 2.24E-04 |
| ATP1B3 | 16 | Cluster 16 | 6161.632337 | 2.22E-04 |
| GADD45A | 16 | Cluster 8 | 1693.912878 | 2.27E-04 |
| E2F6 | 16 | Cluster 6 | 4695.376041 | 2.12E-04 |
| COTL1 | 16 |  | 1516.465971 | 2.07E-04 |
| TNNT2 | 16 | Cluster 9 | 14835.27277 | 2.12E-04 |
| GRK5 | 16 | Cluster 5 | 1262.554008 | 2.15E-04 |
| UGCG | 16 |  | 5260.047458 | 2.12E-04 |
| TUBB1 | 16 | Cluster 7 | 419.7840444 | 2.12E-04 |
| FAM20A | 16 | Cluster 4 | 3057.496411 | 2.21E-04 |
| GOLM1 | 16 | Cluster 4 | 831.5361323 | 2.22E-04 |
| CBX4 | 16 |  | 2535.115811 | 2.12E-04 |
| LOXL2 | 16 |  | 2795.909513 | 2.09E-04 |
| PPP3CC | 16 |  | 8692.714007 | 2.27E-04 |
| SEMA5A | 16 | Cluster 6 | 2649.024151 | 2.12E-04 |
| HSPB3 | 16 | Cluster 8 | 5925.956926 | 2.30E-04 |
| CD300C | 16 | Cluster 16 | 576.5392741 | 2.12E-04 |
| CD84 | 16 |  | 73.2438999 | 2.10E-04 |
| RND2 | 16 |  | 1193.124824 | 2.22E-04 |
| ENSG00000160200 | 16 | Cluster 11 | 7491.31882 | 2.19E-04 |
| THEMIS2 | 16 |  | 48.10012593 | 2.15E-04 |
| RPS6KA1 | 15 |  | 3751.988581 | 2.29E-04 |
| EGLN1 | 15 |  | 4741.45508 | 2.21E-04 |
| CD180 | 15 |  | 434.3294679 | 2.13E-04 |
| EFNA4 | 15 |  | 3632.325214 | 2.11E-04 |
| TNFSF8 | 15 | Cluster 24 | 83.34775173 | 2.13E-04 |
| E2F5 | 15 | Cluster 6 | 146.2810665 | 2.14E-04 |
| MAFB | 15 | Cluster 8 | 2954.577544 | 2.20E-04 |
| PRMT6 | 15 | Cluster 21 | 2031.616974 | 2.07E-04 |
| PAX7 | 15 |  | 2695.893015 | 2.25E-04 |
| SH3PXD2A | 15 | Cluster 9 | 3509.465713 | 2.15E-04 |
| ALCAM | 15 |  | 1003.936367 | 2.23E-04 |
| KIF21A | 15 | Cluster 7 | 1035.201221 | 1.99E-04 |
| HTR2A | 15 | Cluster 5 | 1174.028895 | 2.08E-04 |
| OGN | 15 |  | 2914.266433 | 2.02E-04 |
| CHI3L1 | 15 | Cluster 26 | 1178.87638 | 2.24E-04 |
| CEP41 | 15 | Cluster 17 | 5795.225397 | 2.12E-04 |
| PI4K2A | 15 | Cluster 19 | 1836.835712 | 2.26E-04 |
| KCND3 | 15 |  | 3731.51177 | 1.94E-04 |
| CA2 | 15 |  | 5702.519956 | 2.15E-04 |
| SAMSN1 | 15 |  | 4512.844831 | 2.11E-04 |
| SLAMF8 | 15 |  | 44.24713596 | 2.07E-04 |
| PPIH | 14 | Cluster 6 | 2680.308943 | 2.00E-04 |
| BUD31 | 14 | Cluster 6 | 3174.472342 | 2.02E-04 |
| WIPF3 | 14 | Cluster 6 | 416.0452326 | 2.11E-04 |
| PDIA4 | 14 |  | 2541.862072 | 2.12E-04 |
| ZNF622 | 14 | Cluster 10 | 1657.621098 | 2.05E-04 |
| DYNLT1 | 14 | Cluster 10 | 3395.727135 | 2.05E-04 |
| SEC23B | 14 |  | 7650.602911 | 2.15E-04 |
| MYH3 | 14 | Cluster 9 | 1805.144353 | 2.02E-04 |
| FUT8 | 14 | Cluster 20 | 2529.304857 | 1.92E-04 |
| MGAT2 | 14 | Cluster 20 | 2162.845625 | 1.86E-04 |
| A1BG | 14 | Cluster 6 | 910.2256939 | 2.28E-04 |
| L1CAM | 14 |  | 2882.669526 | 2.23E-04 |
| PBX1 | 14 | Cluster 8 | 4339.22909 | 2.12E-04 |
| TBCB | 14 |  | 2374.625081 | 2.01E-04 |
| HPSE | 14 |  | 2684.457999 | 2.14E-04 |
| PLP1 | 14 | Cluster 30 | 6933.767183 | 2.02E-04 |
| PARD3 | 14 |  | 3734.162227 | 2.09E-04 |
| WWTR1 | 14 |  | 4956.259969 | 2.19E-04 |
| SURF6 | 14 | Cluster 11 | 2335.094637 | 1.99E-04 |
| DIRC3 | 14 | Cluster 10 | 454.4853575 | 1.93E-04 |
| CBX2 | 14 |  | 1979.70588 | 2.11E-04 |
| BIN3 | 14 |  | 804.0725249 | 2.07E-04 |
| ADAMTS12 | 14 | Cluster 6 | 1070.186554 | 2.07E-04 |
| ST3GAL6 | 14 |  | 3680.945691 | 2.05E-04 |
| ALDH1A3 | 14 |  | 3083.491524 | 2.11E-04 |
| TRIM14 | 14 |  | 566.7897016 | 2.12E-04 |
| FLRT3 | 14 |  | 7921.46674 | 2.00E-04 |
| LGMN | 14 |  | 276.1682442 | 2.13E-04 |
| CHRD | 14 | Cluster 22 | 930.0512054 | 2.05E-04 |
| NEDD8-MDP1 | 14 | Cluster 10 | 4694.365165 | 2.02E-04 |
| KCNQ4 | 14 |  | 2875.932073 | 1.90E-04 |
| CLIC1 | 14 | Cluster 34 | 6575.847067 | 2.04E-04 |
| ZIC1 | 14 |  | 2976.790023 | 2.10E-04 |
| SERPINF1 | 14 |  | 4837.934133 | 2.12E-04 |
| NR0B2 | 14 |  | 5996.482389 | 2.18E-04 |
| TUSC3 | 13 |  | 3419.893406 | 1.95E-04 |
| MTHFD1 | 13 | Cluster 11 | 4703.508129 | 1.98E-04 |
| ATP1A1 | 13 |  | 4018.50101 | 2.20E-04 |
| MYH8 | 13 | Cluster 9 | 1046.559709 | 2.03E-04 |
| CYP46A1 | 13 |  | 3705.149961 | 2.07E-04 |
| CD72 | 13 |  | 1180.042072 | 2.12E-04 |
| ST3GAL5 | 13 |  | 4012.427736 | 1.96E-04 |
| NDST2 | 13 | Cluster 13 | 2734.445912 | 2.04E-04 |
| FHL2 | 13 |  | 5805.442121 | 2.28E-04 |
| CALCOCO2 | 13 | Cluster 16 | 1752.719598 | 2.13E-04 |
| FCN1 | 13 |  | 66.62955118 | 2.10E-04 |
| RABGEF1 | 13 | Cluster 36 | 4207.677861 | 2.20E-04 |
| ODF2 | 13 | Cluster 17 | 1920.337202 | 2.09E-04 |
| GLS2 | 13 |  | 1017.766166 | 2.04E-04 |
| GALC | 13 | Cluster 30 | 2043.693881 | 2.13E-04 |
| ALDH2 | 13 |  | 1996.610042 | 2.14E-04 |
| CHSY1 | 13 | Cluster 13 | 2448.306249 | 1.94E-04 |
| PRKAB2 | 13 |  | 3745.299417 | 2.13E-04 |
| SORL1 | 13 | Cluster 19 | 754.8780315 | 2.18E-04 |
| GSTO1 | 13 | Cluster 19 | 1922.781451 | 2.07E-04 |
| DDX31 | 13 | Cluster 8 | 1964.207976 | 1.92E-04 |
| MDK | 13 |  | 5896.701586 | 2.28E-04 |
| GREM1 | 13 |  | 4094.422497 | 2.05E-04 |
| MS4A7 | 13 |  | 89.53244541 | 2.03E-04 |
| S100A6 | 13 |  | 5025.751167 | 2.06E-04 |
| RETNLB | 13 |  | 715.2006766 | 2.20E-04 |
| UCP2 | 13 | Cluster 8 | 3773.080121 | 2.21E-04 |
| CDCA4 | 13 |  | 1909.02419 | 2.04E-04 |
| LSP1 | 13 |  | 886.4216485 | 2.18E-04 |
| MYOF | 13 | Cluster 16 | 1649.655616 | 2.17E-04 |
| HPS3 | 13 |  | 2897.370822 | 2.16E-04 |
| PPP6C | 12 |  | 4481.887736 | 2.22E-04 |
| CPSF3 | 12 | Cluster 6 | 1290.802835 | 1.92E-04 |
| IFI35 | 12 |  | 225.5934949 | 2.09E-04 |
| MPL | 12 |  | 65.58256415 | 2.20E-04 |
| CH25H | 12 |  | 2854.69536 | 2.07E-04 |
| TMEM176B | 12 | Cluster 16 | 2655.293339 | 1.95E-04 |
| LSS | 12 | Cluster 29 | 3172.390701 | 1.94E-04 |
| GPX8 | 12 | Cluster 8 | 802.8419736 | 2.21E-04 |
| NRXN2 | 12 |  | 4238.930332 | 2.02E-04 |
| HAUS8 | 12 | Cluster 17 | 2964.763897 | 2.08E-04 |
| TNRC6C | 12 | Cluster 27 | 1286.801844 | 1.97E-04 |
| MAP2K3 | 12 |  | 1324.781196 | 2.28E-04 |
| EXT2 | 12 |  | 5167.629737 | 1.90E-04 |
| MYF5 | 12 | Cluster 22 | 2353.964569 | 2.15E-04 |
| CHPF2 | 12 | Cluster 12 | 1474.260081 | 1.93E-04 |
| ATP6V1A | 12 |  | 3412.219763 | 2.10E-04 |
| ADAMTSL1 | 12 | Cluster 6 | 523.7287258 | 2.00E-04 |
| ADAMTS9 | 12 | Cluster 6 | 2388.670478 | 2.08E-04 |
| FKBP5 | 12 |  | 5208.992972 | 2.22E-04 |
| CHRNA1 | 12 | Cluster 6 | 500.3082995 | 2.12E-04 |
| VNN1 | 12 |  | 362.3733225 | 2.15E-04 |
| PPM1B | 12 | Cluster 31 | 2724.130253 | 2.09E-04 |
| CRYL1 | 12 | Cluster 16 | 2373.823994 | 2.11E-04 |
| TMEM43 | 12 |  | 8567.704835 | 1.98E-04 |
| PEG10 | 12 |  | 4280.771485 | 1.99E-04 |
| PSRC1 | 12 | Cluster 19 | 2911.967482 | 2.17E-04 |
| CCDC80 | 12 |  | 1535.167403 | 1.99E-04 |
| MAN1B1 | 12 |  | 2616.459885 | 1.96E-04 |
| CREB3L1 | 12 |  | 7548.329601 | 2.23E-04 |
| CASQ2 | 12 |  | 5048.091582 | 1.92E-04 |
| ST6GAL2 | 12 | Cluster 20 | 4176.808545 | 2.08E-04 |
| POU3F4 | 12 |  | 3407.851355 | 2.13E-04 |
| USP18 | 11 |  | 250.9668494 | 2.07E-04 |
| FRS2 | 11 |  | 1562.934655 | 2.22E-04 |
| XBP1 | 11 |  | 879.8567027 | 2.21E-04 |
| TMEM176A | 11 | Cluster 16 | 845.983577 | 1.85E-04 |
| PAG1 | 11 |  | 390.8936268 | 2.15E-04 |
| ENTPD5 | 11 |  | 1330.298818 | 2.13E-04 |
| VPS72 | 11 |  | 2291.710791 | 2.06E-04 |
| XPA | 11 |  | 703.9142408 | 2.01E-04 |
| HIST3H2A | 11 | Cluster 21 | 244.9606528 | 1.97E-04 |
| CALCR | 11 |  | 2636.937896 | 2.20E-04 |
| ELAVL2 | 11 | Cluster 6 | 1376.875562 | 1.99E-04 |
| MFAP2 | 11 |  | 4023.400229 | 1.98E-04 |
| TMEM173 | 11 |  | 701.221425 | 2.03E-04 |
| ABCG5 | 11 |  | 2856.817835 | 2.00E-04 |
| GPR132 | 11 | Cluster 5 | 787.9173802 | 2.12E-04 |
| CHST11 | 11 | Cluster 13 | 1555.075746 | 2.02E-04 |
| CHST14 | 11 | Cluster 12 | 2209.950723 | 1.95E-04 |
| EPB41L3 | 11 |  | 6344.900063 | 2.17E-04 |
| CUX1 | 11 |  | 2949.667821 | 2.16E-04 |
| RASSF5 | 11 |  | 3977.253997 | 2.17E-04 |
| MLXIPL | 11 |  | 1682.321166 | 2.07E-04 |
| ST6GALNAC2 | 11 |  | 3914.700745 | 2.03E-04 |
| GADL1 | 11 |  | 2814.891753 | 1.99E-04 |
| SPRY1 | 11 |  | 1707.653048 | 2.18E-04 |
| TNFRSF11A | 11 |  | 182.9200348 | 2.20E-04 |
| RHNO1 | 11 | Cluster 16 | 1078.736724 | 2.07E-04 |
| HBA2 | 11 |  | 3600.987806 | 2.02E-04 |
| NCALD | 11 |  | 1879.95185 | 2.01E-04 |
| BMP6 | 11 |  | 321.7201684 | 2.18E-04 |
| CYP1B1 | 11 |  | 5412.505779 | 2.14E-04 |
| ST8SIA3 | 11 |  | 3053.371772 | 2.11E-04 |
| ASPN | 11 |  | 1114.666782 | 1.96E-04 |
| UBXN1 | 11 |  | 4759.185211 | 2.05E-04 |
| ALG13 | 11 | Cluster 20 | 3537.853062 | 1.89E-04 |
| TFEC | 11 |  | 3172.491977 | 2.13E-04 |
| FABP7 | 11 |  | 1017.77996 | 2.15E-04 |
| CTHRC1 | 11 |  | 1482.584963 | 2.01E-04 |
| SOX8 | 11 |  | 1303.568934 | 2.06E-04 |
| POU4F1 | 11 |  | 1714.415507 | 2.03E-04 |
| TAF4 | 10 |  | 2080.546335 | 1.97E-04 |
| PKP2 | 10 | Cluster 33 | 1520.707688 | 1.78E-04 |
| EIF3J | 10 |  | 449.9765169 | 1.95E-04 |
| EPHB3 | 10 |  | 2108.494416 | 1.98E-04 |
| CYP7B1 | 10 | Cluster 29 | 976.8006798 | 1.83E-04 |
| WBP4 | 10 | Cluster 6 | 795.6775381 | 1.92E-04 |
| MYL4 | 10 | Cluster 9 | 1028.097196 | 2.01E-04 |
| PIK3AP1 | 10 |  | 1091.52323 | 2.10E-04 |
| SRD5A3 | 10 | Cluster 20 | 3161.831503 | 1.93E-04 |
| DHCR24 | 10 | Cluster 11 | 2506.722895 | 2.01E-04 |
| ARHGEF9 | 10 |  | 2766.868101 | 2.09E-04 |
| MTHFD2 | 10 | Cluster 11 | 1453.981566 | 1.99E-04 |
| WNT5B | 10 |  | 3773.542102 | 2.08E-04 |
| CFI | 10 |  | 5416.200896 | 2.11E-04 |
| JAM3 | 10 |  | 3386.092959 | 2.12E-04 |
| MAN2A2 | 10 | Cluster 20 | 2047.499093 | 1.92E-04 |
| TCTEX1D2 | 10 | Cluster 10 | 480.6182565 | 1.89E-04 |
| TNRC6A | 10 | Cluster 27 | 266.7268318 | 1.96E-04 |
| RBM19 | 10 | Cluster 8 | 3481.090773 | 1.83E-04 |
| GFRA1 | 10 |  | 4511.723653 | 2.10E-04 |
| TBXAS1 | 10 |  | 1121.115146 | 2.16E-04 |
| GNPNAT1 | 10 |  | 3221.98845 | 1.90E-04 |
| CSGALNACT1 | 10 | Cluster 12 | 614.7261622 | 1.88E-04 |
| LIMK2 | 10 |  | 3869.658228 | 1.92E-04 |
| F10 | 10 |  | 1368.239012 | 2.14E-04 |
| CTDSPL | 10 |  | 3437.203981 | 2.02E-04 |
| LIPA | 10 | Cluster 11 | 6515.357505 | 2.00E-04 |
| AKR1A1 | 10 |  | 1649.043804 | 2.01E-04 |
| ADAMTS15 | 10 | Cluster 6 | 1235.38623 | 1.95E-04 |
| MRAS | 10 |  | 1226.734513 | 2.05E-04 |
| XRCC4 | 10 |  | 2596.878452 | 1.96E-04 |
| GPNMB | 10 |  | 1031.998632 | 2.17E-04 |
| ALG5 | 10 | Cluster 20 | 1215.491803 | 1.87E-04 |
| FAM49B | 10 | Cluster 6 | 2706.701166 | 2.15E-04 |
| TXNDC12 | 10 |  | 2121.806943 | 2.01E-04 |
| RGS7 | 10 |  | 2980.741059 | 2.09E-04 |
| APOBEC3G | 10 |  | 630.4484153 | 2.16E-04 |
| LLGL1 | 10 |  | 1674.501271 | 2.07E-04 |
| PPT1 | 10 |  | 3259.624869 | 2.10E-04 |
| RASSF2 | 10 |  | 3698.019552 | 1.86E-04 |
| GMDS | 10 |  | 1671.665142 | 1.89E-04 |
| TET1 | 10 |  | 539.8394306 | 2.07E-04 |
| SH3PXD2B | 10 | Cluster 9 | 2816.188427 | 2.11E-04 |
| GPR124 | 10 |  | 12272.21213 | 1.91E-04 |
| SLCO2B1 | 10 |  | 2558.603305 | 1.98E-04 |
| VIMP | 10 | Cluster 19 | 1987.381721 | 2.00E-04 |
| PLAGL1 | 10 |  | 4777.261549 | 1.83E-04 |
| CD99 | 10 |  | 377.7127569 | 2.15E-04 |
| MXRA5 | 10 |  | 974.1423943 | 1.96E-04 |
| S100A11 | 10 |  | 4342.967798 | 2.10E-04 |
| SLC15A3 | 10 |  | 196.4277925 | 2.07E-04 |
| ABTB2 | 10 |  | 2555.464438 | 2.04E-04 |
| INF2 | 10 |  | 2495.975385 | 2.09E-04 |
| LSM14A | 10 |  | 1660.681769 | 1.89E-04 |
| ERN1 | 9 |  | 3696.126877 | 2.04E-04 |
| KCNE3 | 9 |  | 688.4554474 | 1.79E-04 |
| THRB | 9 |  | 3292.973629 | 2.13E-04 |
| KCNE1L | 9 |  | 873.2325618 | 1.86E-04 |
| ARHGEF18 | 9 |  | 1338.913331 | 2.00E-04 |
| ST8SIA1 | 9 | Cluster 20 | 451.0466116 | 1.95E-04 |
| CCNY | 9 |  | 649.3455936 | 2.03E-04 |
| GABARAPL1 | 9 |  | 1761.664596 | 2.08E-04 |
| CAMK2G | 9 |  | 1710.993746 | 2.15E-04 |
| HBS1L | 9 | Cluster 8 | 896.532632 | 1.83E-04 |
| SOAT1 | 9 | Cluster 11 | 923.6170647 | 1.99E-04 |
| GGT6 | 9 |  | 453.8816294 | 1.99E-04 |
| ADAMTSL3 | 9 | Cluster 6 | 0 | 1.95E-04 |
| ADAMTS17 | 9 | Cluster 6 | 0 | 1.95E-04 |
| BID | 9 |  | 962.6965731 | 2.09E-04 |
| HS3ST3B1 | 9 | Cluster 13 | 572.8486503 | 1.85E-04 |
| MAP4K4 | 9 |  | 660.5690067 | 2.09E-04 |
| BCAT1 | 9 |  | 4184.31162 | 2.03E-04 |
| CHRM3 | 9 | Cluster 5 | 0 | 1.91E-04 |
| ATP1B4 | 9 |  | 1039.156319 | 2.15E-04 |
| UGGT1 | 9 |  | 3889.21117 | 1.96E-04 |
| DNALI1 | 9 | Cluster 10 | 233.7367242 | 1.97E-04 |
| TRPV2 | 9 |  | 6339.872378 | 2.07E-04 |
| GALNT7 | 9 |  | 3736.867762 | 1.71E-04 |
| PFAS | 9 |  | 1562.358232 | 1.78E-04 |
| IQGAP2 | 9 |  | 1285.363007 | 2.04E-04 |
| LYAR | 9 | Cluster 8 | 1417.613052 | 1.84E-04 |
| PFKFB2 | 9 |  | 1605.051979 | 2.02E-04 |
| CNP | 9 |  | 1302.902866 | 1.97E-04 |
| PABPC5 | 9 |  | 8982.197536 | 1.96E-04 |
| SRXN1 | 9 |  | 1359.645093 | 2.02E-04 |
| ENSG00000259288 | 9 |  | 683.8706018 | 2.10E-04 |
| TRMT1L | 9 | Cluster 8 | 661.3016174 | 1.77E-04 |
| GJA8 | 9 | Cluster 20 | 2675.057344 | 1.98E-04 |
| OLIG1 | 9 | Cluster 30 | 557.2981135 | 2.06E-04 |
| PDE1C | 9 |  | 1849.269121 | 1.97E-04 |
| LONRF2 | 9 |  | 3734.122957 | 2.04E-04 |
| ACSL6 | 9 |  | 2066.243598 | 1.79E-04 |
| GPR34 | 9 |  | 32.24388406 | 2.01E-04 |
| NDN | 9 |  | 2070.280725 | 1.97E-04 |
| CPVL | 9 |  | 3406.497326 | 1.99E-04 |
| PDZK1 | 9 |  | 4211.282931 | 2.05E-04 |
| BCHE | 9 |  | 2062.143967 | 2.20E-04 |
| RIN3 | 9 |  | 78.58499186 | 2.11E-04 |
| SGPL1 | 9 |  | 1612.966926 | 1.97E-04 |
| FAP | 9 |  | 567.858053 | 2.02E-04 |
| CHFR | 9 |  | 1532.290674 | 2.04E-04 |
| IL32 | 9 |  | 464.0504174 | 2.20E-04 |
| TMEFF2 | 9 |  | 5212.36148 | 1.92E-04 |
| TAF8 | 8 |  | 3184.554396 | 1.88E-04 |
| KYNU | 8 |  | 2252.489313 | 1.88E-04 |
| EVI2A | 8 |  | 1278.792249 | 1.95E-04 |
| SEMA6D | 8 |  | 956.851686 | 2.03E-04 |
| CHKB | 8 |  | 1974.087202 | 1.86E-04 |
| FJX1 | 8 |  | 4748.691559 | 1.86E-04 |
| HSD3B2 | 8 |  | 912.3716214 | 1.84E-04 |
| MST4 | 8 | Cluster 31 | 2393.024195 | 2.12E-04 |
| MICB | 8 |  | 69.12965243 | 2.11E-04 |
| CHN1 | 8 |  | 3670.265408 | 2.01E-04 |
| RAB21 | 8 | Cluster 36 | 637.7903084 | 1.85E-04 |
| JUNB | 8 |  | 302.6096851 | 2.23E-04 |
| GGA2 | 8 |  | 1098.135141 | 1.97E-04 |
| KCNN4 | 8 |  | 1085.183758 | 1.84E-04 |
| PPP1R14A | 8 |  | 4693.890574 | 1.94E-04 |
| KAL1 | 8 |  | 2156.523943 | 2.07E-04 |
| RAB6B | 8 |  | 2043.681754 | 1.98E-04 |
| PROCR | 8 |  | 1993.063474 | 2.13E-04 |
| CRMP1 | 8 |  | 1464.209665 | 1.94E-04 |
| USP47 | 8 |  | 3933.193614 | 2.02E-04 |
| SORBS1 | 8 |  | 1918.413887 | 2.01E-04 |
| DNAH3 | 8 | Cluster 10 | 368.483834 | 1.88E-04 |
| EPB41L5 | 8 |  | 5752.721223 | 1.92E-04 |
| MRC2 | 8 |  | 483.1311821 | 2.08E-04 |
| CMTM3 | 8 | Cluster 32 | 1102.585148 | 2.05E-04 |
| DNAI1 | 8 | Cluster 10 | 132.6721898 | 1.92E-04 |
| PREPL | 8 |  | 1008.865484 | 1.89E-04 |
| RALB | 8 |  | 1618.436162 | 2.12E-04 |
| NMT1 | 8 |  | 6149.750916 | 2.01E-04 |
| OSTC | 8 |  | 162.81098 | 1.86E-04 |
| SLC25A17 | 8 |  | 4101.31162 | 1.88E-04 |
| PPP4R1 | 8 |  | 765.8110531 | 1.92E-04 |
| FOXP2 | 8 |  | 1068.749027 | 2.15E-04 |
| PLA2G2A | 8 |  | 801.8267372 | 2.23E-04 |
| TPP1 | 8 |  | 811.126873 | 1.96E-04 |
| ASMTL | 8 |  | 3504.066405 | 1.90E-04 |
| TMCO1 | 8 |  | 983.2455852 | 1.94E-04 |
| COLEC12 | 8 |  | 841.1626202 | 2.10E-04 |
| TYRP1 | 8 |  | 586.4673174 | 1.94E-04 |
| NRCAM | 8 |  | 697.7937147 | 2.03E-04 |
| RIPK4 | 8 |  | 2158.561634 | 2.00E-04 |
| FRMD3 | 8 |  | 1238.281954 | 1.93E-04 |
| EVC | 8 |  | 1575.541111 | 1.89E-04 |
| PIM1 | 8 |  | 278.2909573 | 2.21E-04 |
| MCOLN1 | 8 |  | 3495.964405 | 1.91E-04 |
| TBX2 | 8 |  | 174.9648854 | 1.99E-04 |
| XK | 8 |  | 1166.105809 | 2.09E-04 |
| SLC22A4 | 8 |  | 1252.720891 | 1.97E-04 |
| NEFH | 8 |  | 773.5674455 | 2.17E-04 |
| SERPINB1 | 8 |  | 509.4317052 | 2.13E-04 |
| DLG5 | 8 |  | 2183.190155 | 1.84E-04 |
| PCDH17 | 8 |  | 5083.441827 | 1.92E-04 |
| TCN2 | 8 | Cluster 11 | 1400.47257 | 1.99E-04 |
| SLC15A2 | 8 |  | 2447.835618 | 1.83E-04 |
| HMGB3 | 8 |  | 744.1784448 | 2.03E-04 |
| SPINT1 | 8 |  | 3438.393915 | 1.99E-04 |
| NPL | 8 |  | 1049.436051 | 1.89E-04 |
| TPK1 | 8 |  | 1196.854601 | 1.91E-04 |
| DAAM2 | 8 |  | 3690.025977 | 2.03E-04 |
| PRMT2 | 8 | Cluster 11 | 718.4244116 | 1.84E-04 |
| GLT8D2 | 8 |  | 3466.517325 | 1.91E-04 |
| FANCL | 7 |  | 583.1896053 | 1.93E-04 |
| MED29 | 7 | Cluster 15 | 1214.192089 | 1.97E-04 |
| ZC3H13 | 7 | Cluster 15 | 1032.288271 | 1.78E-04 |
| APOC1 | 7 | Cluster 19 | 371.8477978 | 1.97E-04 |
| SHANK2 | 7 |  | 4558.951055 | 1.95E-04 |
| FAT4 | 7 |  | 1396.992569 | 1.94E-04 |
| BFSP2 | 7 | Cluster 20 | 1107.737997 | 1.91E-04 |
| OSMR | 7 |  | 2.380480072 | 2.12E-04 |
| HOXB2 | 7 | Cluster 8 | 338.0280548 | 2.13E-04 |
| CHMP4A | 7 | Cluster 20 | 1122.779072 | 1.99E-04 |
| PTGDS | 7 |  | 75.36040389 | 2.03E-04 |
| DHRS9 | 7 |  | 640.3844439 | 1.76E-04 |
| NNMT | 7 |  | 807.7511711 | 1.94E-04 |
| HS6ST2 | 7 | Cluster 13 | 203.7680258 | 1.85E-04 |
| SSH1 | 7 |  | 738.4709452 | 2.09E-04 |
| P2RX4 | 7 |  | 513.944219 | 2.11E-04 |
| STK24 | 7 | Cluster 31 | 275.0921572 | 2.18E-04 |
| GAS2 | 7 |  | 749.3044187 | 1.99E-04 |
| SBF1 | 7 |  | 2409.832904 | 2.00E-04 |
| BRIP1 | 7 |  | 107.803254 | 1.86E-04 |
| ARHGEF16 | 7 |  | 1179.836609 | 2.00E-04 |
| HDAC10 | 7 |  | 7.582326546 | 1.96E-04 |
| CNKSR2 | 7 |  | 1849.361721 | 2.13E-04 |
| DNAH6 | 7 | Cluster 10 | 0 | 1.87E-04 |
| DOK6 | 7 |  | 3461.328655 | 1.80E-04 |
| KIAA1549 | 7 |  | 2096.257544 | 2.14E-04 |
| WDR81 | 7 |  | 786.5108427 | 1.97E-04 |
| TOX4 | 7 |  | 5589.217911 | 2.06E-04 |
| SAT1 | 7 |  | 2032.901165 | 2.03E-04 |
| CNIH1 | 7 |  | 2921.321932 | 1.91E-04 |
| ROR1 | 7 |  | 1003.686616 | 1.92E-04 |
| SIVA1 | 7 |  | 792.0539303 | 2.03E-04 |
| NCLN | 7 |  | 3177.853084 | 1.77E-04 |
| LLGL2 | 7 |  | 4029.212454 | 1.88E-04 |
| CAPG | 7 |  | 637.7444586 | 2.01E-04 |
| LGI1 | 7 |  | 778.7784205 | 1.89E-04 |
| MEGF10 | 7 |  | 2916.897634 | 2.00E-04 |
| GALE | 7 |  | 1537.49099 | 1.86E-04 |
| ERP29 | 7 |  | 1558.445525 | 1.97E-04 |
| MYCL | 7 |  | 2894.455831 | 1.90E-04 |
| SLC22A5 | 7 |  | 802.080436 | 1.82E-04 |
| PDE9A | 7 |  | 1346.855138 | 1.98E-04 |
| FRZB | 7 |  | 513.4239248 | 1.85E-04 |
| CBR1 | 7 |  | 2386.318787 | 1.95E-04 |
| STK36 | 7 |  | 2457.739993 | 1.90E-04 |
| RTN1 | 7 |  | 1253.996851 | 1.96E-04 |
| PTK7 | 7 |  | 892.5790641 | 1.92E-04 |
| EMCN | 7 |  | 1077.192988 | 1.98E-04 |
| NTAN1 | 7 |  | 1001.745907 | 2.15E-04 |
| BHMT2 | 7 | Cluster 11 | 318.0725142 | 1.93E-04 |
| APOBEC3B | 7 |  | 1063.186982 | 2.14E-04 |
| DUSP22 | 7 |  | 3946.23161 | 2.11E-04 |
| SLC1A4 | 7 | Cluster 14 | 3785.720329 | 1.69E-04 |
| NUDT4 | 7 | Cluster 8 | 416.507087 | 1.93E-04 |
| DIRAS1 | 7 |  | 1416.967641 | 1.90E-04 |
| PRPS2 | 7 |  | 1536.173663 | 2.00E-04 |
| ANXA3 | 7 |  | 667.4365643 | 1.96E-04 |
| ANTXR1 | 7 |  | 2081.948961 | 1.96E-04 |
| TRAF4 | 7 |  | 36.82431207 | 2.00E-04 |
| TOX | 7 |  | 2041.054567 | 1.99E-04 |
| SLC38A6 | 7 | Cluster 14 | 952.6784961 | 1.73E-04 |
| SLC31A2 | 7 | Cluster 35 | 887.8016278 | 1.86E-04 |
| BICC1 | 7 |  | 3482.015858 | 1.86E-04 |
| FAIM2 | 7 |  | 973.9744163 | 1.94E-04 |
| ETV5 | 7 |  | 589.6175896 | 2.03E-04 |
| KHDRBS2 | 7 |  | 2122.235104 | 2.05E-04 |
| HAPLN2 | 7 |  | 715.1259616 | 1.96E-04 |
| DPEP2 | 7 |  | 251.9078241 | 2.06E-04 |
| IRX2 | 7 |  | 433.4065771 | 1.92E-04 |
| GLIS2 | 7 |  | 1731.982272 | 2.01E-04 |
| MED28 | 6 | Cluster 15 | 1139.539313 | 2.00E-04 |
| FANCG | 6 |  | 725.3287666 | 2.10E-04 |
| DSC2 | 6 |  | 468.8113573 | 1.70E-04 |
| HSD3B7 | 6 | Cluster 29 | 1024.716348 | 1.97E-04 |
| MYL5 | 6 |  | 83.72251741 | 1.85E-04 |
| LSM11 | 6 |  | 339.0533723 | 1.77E-04 |
| PARP4 | 6 | Cluster 36 | 336.5426777 | 1.87E-04 |
| HIST1H2AE | 6 |  | 0.333333333 | 1.83E-04 |
| EGR3 | 6 |  | 176.6249818 | 1.94E-04 |
| ALDH1L1 | 6 | Cluster 11 | 307.4465193 | 2.02E-04 |
| WHAMM | 6 |  | 59.51862316 | 1.93E-04 |
| KIAA1598 | 6 |  | 869.6343284 | 1.97E-04 |
| IER3 | 6 |  | 487.0454663 | 2.12E-04 |
| NTN4 | 6 |  | 685.9132678 | 1.94E-04 |
| GRIN2D | 6 |  | 740.9073354 | 2.01E-04 |
| PTP4A1 | 6 |  | 593.4521248 | 2.01E-04 |
| TGIF2 | 6 |  | 1405.296446 | 1.96E-04 |
| SLC25A5 | 6 |  | 82.25053542 | 2.00E-04 |
| CES2 | 6 |  | 457.1792253 | 2.07E-04 |
| CYP4F2 | 6 |  | 649.2115862 | 1.97E-04 |
| SEMA7A | 6 |  | 327.8780838 | 1.92E-04 |
| B3GNT7 | 6 |  | 1428.201214 | 1.70E-04 |
| GFRA4 | 6 |  | 660.4747859 | 2.00E-04 |
| ALG8 | 6 |  | 303.6710264 | 1.83E-04 |
| DCAF5 | 6 |  | 2715.884327 | 1.91E-04 |
| BLVRB | 6 |  | 397.291751 | 1.87E-04 |
| DEPDC7 | 6 |  | 2650.615732 | 2.00E-04 |
| RSU1 | 6 |  | 1451.622459 | 1.95E-04 |
| NADSYN1 | 6 |  | 2376.92983 | 1.90E-04 |
| CALML5 | 6 |  | 1531.687602 | 1.85E-04 |
| MCCC2 | 6 |  | 1816.432935 | 1.82E-04 |
| REEP1 | 6 |  | 3517.592401 | 1.86E-04 |
| DCLK1 | 6 |  | 2246.160011 | 2.04E-04 |
| PDLIM1 | 6 |  | 884.1133193 | 2.02E-04 |
| CACUL1 | 6 |  | 939.0088657 | 1.95E-04 |
| KIAA0226L | 6 |  | 4140.208893 | 1.87E-04 |
| AKR1B10 | 6 |  | 186.5098969 | 1.85E-04 |
| CPT1C | 6 |  | 885.3239768 | 1.85E-04 |
| AFAP1 | 6 |  | 1222.682556 | 2.05E-04 |
| DAND5 | 6 |  | 530.6937974 | 1.84E-04 |
| TBL2 | 6 |  | 437.4399105 | 1.84E-04 |
| FUT11 | 6 |  | 135.1847621 | 1.70E-04 |
| CFAP46 | 6 |  | 1760.163261 | 1.79E-04 |
| FRMD6 | 6 |  | 1812.488982 | 1.77E-04 |
| SLC7A1 | 6 | Cluster 14 | 785.103849 | 1.69E-04 |
| TMEM208 | 6 |  | 2760.356927 | 1.99E-04 |
| S100A2 | 6 |  | 513.8014691 | 1.75E-04 |
| TRPC4 | 6 |  | 626.6963403 | 1.99E-04 |
| LRRC17 | 6 |  | 2031.714217 | 1.92E-04 |
| SMEK1 | 6 |  | 3387.061497 | 2.00E-04 |
| WNK1 | 6 |  | 3563.71498 | 1.87E-04 |
| OCIAD2 | 6 |  | 8993.968115 | 1.97E-04 |
| SFMBT1 | 6 |  | 1282.812271 | 1.89E-04 |
| SMOC1 | 6 |  | 770.1032618 | 1.90E-04 |
| NKAIN2 | 6 |  | 4177.461286 | 1.73E-04 |
| ARL15 | 6 |  | 2225.696414 | 1.85E-04 |
| THBS3 | 6 |  | 3.258217487 | 1.83E-04 |
| CPXM1 | 6 |  | 440.8805161 | 1.89E-04 |
| HIST1H1C | 6 |  | 15.80892675 | 1.89E-04 |
| MOXD1 | 6 |  | 1024.59892 | 1.94E-04 |
| FOXF2 | 6 |  | 1258.734898 | 1.93E-04 |
| PNMAL1 | 6 |  | 2015.150265 | 1.72E-04 |
| TOB1 | 6 |  | 176.7164823 | 2.16E-04 |
| LMF1 | 6 |  | 5185.833102 | 1.97E-04 |
| EXTL2 | 6 | Cluster 13 | 10.541284 | 1.64E-04 |
| SSBP2 | 6 |  | 1762.285529 | 1.94E-04 |
| C10orf54 | 6 |  | 15.08925076 | 1.98E-04 |
| HMGCLL1 | 6 |  | 3581.95222 | 1.76E-04 |
| MYO1B | 6 |  | 5392.746927 | 1.93E-04 |
| OLFML2B | 6 |  | 745.2062252 | 1.89E-04 |
| CAPN6 | 6 |  | 823.2690909 | 2.02E-04 |
| ABCB4 | 6 |  | 315.9464412 | 1.76E-04 |
| SAMD4A | 6 |  | 2071.559242 | 1.92E-04 |
| BSND | 6 |  | 4140.248746 | 1.75E-04 |
| ENOPH1 | 6 |  | 784.675232 | 1.93E-04 |
| SPIRE1 | 6 |  | 379.081891 | 1.96E-04 |
| PXDN | 6 |  | 289.122334 | 2.03E-04 |
| HMCN1 | 6 |  | 3547.741499 | 1.83E-04 |
| CYP4B1 | 6 |  | 634.1843861 | 1.74E-04 |
| PPIC | 6 |  | 367.3116245 | 2.00E-04 |
| YEATS2 | 5 |  | 153.5402465 | 1.81E-04 |
| PKP1 | 5 | Cluster 33 | 1345.618512 | 1.73E-04 |
| SEC31B | 5 |  | 761.7473977 | 1.91E-04 |
| ARNT2 | 5 |  | 149.1789218 | 1.98E-04 |
| WLS | 5 |  | 686.049649 | 1.76E-04 |
| BFSP1 | 5 | Cluster 20 | 435.910724 | 1.81E-04 |
| JAM2 | 5 |  | 360.6199012 | 2.08E-04 |
| MAN1C1 | 5 |  | 359.0667015 | 1.88E-04 |
| CGI-74 | 5 |  | 814.0691532 | 1.81E-04 |
| RBP1 | 5 |  | 598.030146 | 1.96E-04 |
| ADM2 | 5 |  | 2406.276319 | 1.83E-04 |
| GFER | 5 |  | 1610.783419 | 1.77E-04 |
| SRGAP1 | 5 |  | 145.4472945 | 2.01E-04 |
| HYAL4 | 5 |  | 70.22757274 | 2.14E-04 |
| ARHGEF3 | 5 |  | 496.450504 | 1.99E-04 |
| CFHR1 | 5 |  | 257.1898263 | 1.74E-04 |
| ABCD4 | 5 |  | 336.4839772 | 1.81E-04 |
| PRPF40B | 5 |  | 281.8454696 | 1.84E-04 |
| NSMCE1 | 5 |  | 265.7905129 | 1.79E-04 |
| CCL3L3 | 5 |  | 0 | 2.10E-04 |
| HMGN1 | 5 |  | 391.121895 | 2.11E-04 |
| IFT81 | 5 |  | 451.3298971 | 1.87E-04 |
| RAB9B | 5 | Cluster 36 | 116.9060484 | 1.72E-04 |
| ARHGAP33 | 5 |  | 3618.436625 | 1.89E-04 |
| FXYD6 | 5 |  | 175.1824798 | 1.79E-04 |
| RAB15 | 5 | Cluster 36 | 101.6204946 | 1.70E-04 |
| LONP2 | 5 |  | 899.4368142 | 1.98E-04 |
| MUC17 | 5 |  | 403.188825 | 1.64E-04 |
| PHF1 | 5 |  | 596.1378973 | 2.08E-04 |
| ARHGAP19 | 5 |  | 92.59255838 | 2.08E-04 |
| RGS9BP | 5 |  | 420.3809615 | 2.03E-04 |
| CKLF | 5 | Cluster 32 | 86.6141326 | 1.75E-04 |
| ZNF521 | 5 |  | 3243.439741 | 1.94E-04 |
| SLC18A2 | 5 |  | 2417.90271 | 1.84E-04 |
| MAL | 5 |  | 304.9133894 | 1.94E-04 |
| KPNA3 | 5 |  | 267.1811717 | 1.91E-04 |
| GALNT9 | 5 |  | 224.3143274 | 1.69E-04 |
| ECM1 | 5 |  | 406.4184852 | 1.94E-04 |
| RCAN2 | 5 |  | 1457.358543 | 1.87E-04 |
| LILRB5 | 5 |  | 33.19673166 | 1.93E-04 |
| ADAM28 | 5 |  | 1137.431908 | 1.94E-04 |
| ERRFI1 | 5 |  | 9891.455692 | 1.95E-04 |
| TTF2 | 5 |  | 843.9983148 | 2.02E-04 |
| TMEM57 | 5 |  | 1237.215631 | 1.79E-04 |
| TMX4 | 5 |  | 512.5156522 | 1.86E-04 |
| ZFX | 5 |  | 486.0227542 | 1.85E-04 |
| BAIAP2L1 | 5 |  | 761.9191381 | 1.95E-04 |
| TDP1 | 5 |  | 151.6306215 | 1.92E-04 |
| LIMS2 | 5 |  | 555.8186276 | 1.80E-04 |
| ARID3A | 5 |  | 1826.581554 | 1.97E-04 |
| MAGEL2 | 5 |  | 148.9656374 | 1.79E-04 |
| NPAP1 | 5 |  | 108.0776989 | 1.83E-04 |
| MXD1 | 5 |  | 371.2907992 | 1.93E-04 |
| HINFP | 5 |  | 1224.079968 | 1.76E-04 |
| ACOT7 | 5 |  | 735.417384 | 1.83E-04 |
| PUS1 | 5 |  | 3379.585209 | 1.84E-04 |
| MEST | 5 |  | 393.9008007 | 1.70E-04 |
| BCAS1 | 5 |  | 762.0554472 | 1.77E-04 |
| PLA2G4F | 5 |  | 169.7272286 | 2.10E-04 |
| CHIC2 | 5 |  | 521.0982584 | 1.79E-04 |
| TMEM119 | 5 |  | 151.420174 | 2.02E-04 |
| ARL4C | 5 |  | 2757.946177 | 1.79E-04 |
| CRISPLD1 | 5 |  | 1858.354594 | 1.86E-04 |
| STXBP6 | 5 |  | 2131.38286 | 1.83E-04 |
| SRPK1 | 5 |  | 111.2470325 | 2.01E-04 |
| CRABP1 | 5 |  | 267.053365 | 1.95E-04 |
| PLEKHB1 | 5 |  | 2747.117687 | 1.94E-04 |
| IGSF3 | 5 | Cluster 36 | 172.1565917 | 1.88E-04 |
| DIRAS3 | 5 |  | 1512.890502 | 1.84E-04 |
| GPR157 | 5 |  | 6154.031958 | 1.55E-04 |
| ME1 | 5 |  | 325.1280518 | 1.89E-04 |
| CNGA1 | 5 |  | 311.2655808 | 1.86E-04 |
| ZFAT | 5 |  | 25.61580733 | 1.99E-04 |
| CRY2 | 5 |  | 250.6660018 | 2.02E-04 |
| KIAA0100 | 5 |  | 717.1650578 | 1.71E-04 |
| ROBO4 | 5 |  | 2707.740361 | 1.94E-04 |
| OLFML2A | 5 |  | 535.1047905 | 1.92E-04 |
| BACE2 | 5 |  | 492.8569872 | 1.96E-04 |
| SLC13A3 | 5 |  | 3288.132859 | 1.62E-04 |
| SYNPO | 5 |  | 750.4026102 | 1.88E-04 |
| SLC43A2 | 5 | Cluster 14 | 2082.45193 | 1.88E-04 |
| SLC2A10 | 5 |  | 1036.877674 | 1.88E-04 |
| CLIC6 | 5 | Cluster 34 | 2970.757192 | 1.87E-04 |
| ABCC6 | 5 |  | 680.7343095 | 1.79E-04 |
| PRSS12 | 5 |  | 1446.783551 | 1.83E-04 |
| LIN28B | 5 |  | 487.528043 | 1.98E-04 |
| SLC25A37 | 5 |  | 361.0241608 | 1.86E-04 |
| CLEC11A | 5 |  | 35.30944467 | 2.01E-04 |
| SERINC5 | 5 |  | 1801.143396 | 1.99E-04 |
| MN1 | 5 |  | 500.2778231 | 1.83E-04 |
| SOX11 | 5 |  | 259.339132 | 1.99E-04 |
| ATP6AP1L | 5 |  | 519.1105438 | 1.98E-04 |
| SLCO1C1 | 5 |  | 304.6909476 | 1.73E-04 |
| SLC9A7 | 5 |  | 3381.035636 | 1.83E-04 |
| NFIB | 5 |  | 1076.731981 | 1.83E-04 |
| HPCAL1 | 5 |  | 3467.703266 | 1.78E-04 |
| EMP3 | 5 |  | 395.061883 | 1.91E-04 |
| CA13 | 5 |  | 876.640961 | 1.85E-04 |
| SOX4 | 5 |  | 68.06407519 | 2.02E-04 |
| MED19 | 4 | Cluster 15 | 96.71898965 | 1.83E-04 |
| TAF11 | 4 |  | 632.4171633 | 1.70E-04 |
| TDO2 | 4 |  | 331.3834324 | 1.83E-04 |
| CCDC101 | 4 |  | 48.1632197 | 1.82E-04 |
| DLGAP4 | 4 |  | 225.3426206 | 1.80E-04 |
| RSPO3 | 4 |  | 2357.895308 | 1.98E-04 |
| SRD5A1 | 4 |  | 144.6918489 | 1.64E-04 |
| CDON | 4 |  | 181.6623748 | 1.79E-04 |
| YAF2 | 4 |  | 2206.360761 | 1.69E-04 |
| GAS1 | 4 |  | 127.4720734 | 1.84E-04 |
| RXRG | 4 |  | 42.96051926 | 2.09E-04 |
| PLP2 | 4 |  | 2740.056195 | 1.81E-04 |
| TIMM8B | 4 |  | 335.5095647 | 1.79E-04 |
| KCNMB4 | 4 |  | 721.2816149 | 1.66E-04 |
| RGS19 | 4 |  | 259.0833325 | 2.07E-04 |
| TGIF1 | 4 |  | 149.6376152 | 2.02E-04 |
| FGD2 | 4 |  | 94.68284883 | 1.92E-04 |
| INPP4B | 4 |  | 270.2219746 | 1.95E-04 |
| ZFHX3 | 4 |  | 634.9395277 | 1.91E-04 |
| TRIL | 4 |  | 3004.089594 | 1.86E-04 |
| SPRR2B | 4 | Cluster 33 | 127.3966969 | 1.52E-04 |
| NFX1 | 4 |  | 720.3764726 | 1.96E-04 |
| CMTM7 | 4 | Cluster 32 | 33.88739258 | 1.81E-04 |
| MMP19 | 4 |  | 31.2567861 | 2.01E-04 |
| PTPRE | 4 |  | 822.1610776 | 2.20E-04 |
| MOK | 4 |  | 17.74651767 | 1.98E-04 |
| LELP1 | 4 |  | 1165.795574 | 1.77E-04 |
| CDC37L1 | 4 |  | 341.6374942 | 1.99E-04 |
| FZD10 | 4 |  | 2978.12444 | 1.75E-04 |
| C1orf109 | 4 |  | 1931.608475 | 1.54E-04 |
| CLN5 | 4 |  | 93.79342554 | 1.85E-04 |
| EML2 | 4 |  | 168.4237205 | 1.74E-04 |
| TOP1MT | 4 |  | 1249.893874 | 1.86E-04 |
| UFC1 | 4 |  | 210.7824452 | 1.87E-04 |
| LRRC52 | 4 |  | 3506.152431 | 1.67E-04 |
| PDE7B | 4 |  | 221.3381556 | 1.84E-04 |
| PRTFDC1 | 4 |  | 333.6004519 | 1.95E-04 |
| TMEM50A | 4 |  | 894.7515958 | 1.78E-04 |
| ANGPTL1 | 4 |  | 85.83939878 | 1.97E-04 |
| SPEN | 4 |  | 514.5699367 | 2.01E-04 |
| UAP1L1 | 4 |  | 493.7420641 | 1.63E-04 |
| USP40 | 4 |  | 319.7185152 | 1.70E-04 |
| SLC39A1 | 4 | Cluster 35 | 185.7501852 | 1.74E-04 |
| GIMAP1 | 4 |  | 1373.956065 | 1.65E-04 |
| STOX2 | 4 |  | 837.0481805 | 1.60E-04 |
| ESRRG | 4 |  | 587.534686 | 1.83E-04 |
| PLXDC1 | 4 |  | 787.9390299 | 1.68E-04 |
| SYAP1 | 4 |  | 374.8907485 | 1.76E-04 |
| AMER3 | 4 |  | 538.3970644 | 1.69E-04 |
| TANC2 | 4 |  | 228.8982545 | 1.62E-04 |
| SLITRK5 | 4 |  | 173.1371517 | 1.75E-04 |
| MTMR10 | 4 |  | 3057.963462 | 1.70E-04 |
| LRRC56 | 4 |  | 1087.508775 | 1.82E-04 |
| FAM179A | 4 |  | 333.452123 | 1.68E-04 |
| TCTA | 4 |  | 443.2691749 | 1.72E-04 |
| FAM26F | 4 |  | 35.64190181 | 1.92E-04 |
| STK17B | 4 |  | 3032.969179 | 1.58E-04 |
| DMBT1 | 4 |  | 250.6262616 | 1.95E-04 |
| SERAC1 | 4 |  | 663.9639375 | 1.82E-04 |
| MT1M | 4 | Cluster 35 | 640.623096 | 1.91E-04 |
| TMEM45A | 4 |  | 3107.141171 | 1.66E-04 |
| SIGLEC10 | 4 |  | 253.5640016 | 1.96E-04 |
| TNFAIP2 | 4 |  | 306.2813049 | 1.79E-04 |
| UNC5C | 4 |  | 279.2111188 | 1.80E-04 |
| CBLN4 | 4 |  | 1122.997622 | 1.77E-04 |
| DIO1 | 4 |  | 178.7873893 | 1.75E-04 |
| SERP1 | 4 |  | 63.39452818 | 1.97E-04 |
| TRIM59 | 4 |  | 106.3589937 | 1.80E-04 |
| VMP1 | 4 |  | 350.9585737 | 1.82E-04 |
| ZNF608 | 4 |  | 437.6421954 | 1.86E-04 |
| GPM6B | 4 |  | 3703.031399 | 1.66E-04 |
| PKDCC | 4 |  | 337.7289016 | 1.65E-04 |
| MPV17L | 4 |  | 397.7320577 | 1.75E-04 |
| TSPAN9 | 4 |  | 514.1582332 | 1.82E-04 |
| RFXAP | 4 |  | 97.83053627 | 1.94E-04 |
| TTYH3 | 4 | Cluster 34 | 3067.492532 | 1.62E-04 |
| AQP3 | 4 |  | 3144.71174 | 1.97E-04 |
| FAM46A | 4 |  | 217.2795579 | 1.79E-04 |
| NINJ2 | 4 |  | 263.6205702 | 1.78E-04 |
| TNFAIP8 | 4 |  | 1652.549393 | 1.81E-04 |
| MAP3K9 | 4 |  | 828.0916303 | 1.87E-04 |
| RNF212 | 4 |  | 284.5274473 | 1.82E-04 |
| NFU1 | 4 |  | 560.0251636 | 1.88E-04 |
| CLCN4 | 4 |  | 318.0690097 | 1.72E-04 |
| CMKLR1 | 4 |  | 0.308748105 | 2.12E-04 |
| OSTF1 | 4 |  | 1353.265642 | 1.88E-04 |
| MARK1 | 4 |  | 132.152567 | 1.87E-04 |
| ARMCX4 | 4 |  | 3064.815108 | 1.59E-04 |
| ABRACL | 4 |  | 334.1111922 | 1.70E-04 |
| LST1 | 4 |  | 70.96104517 | 1.91E-04 |
| CORO2B | 4 |  | 3160.805228 | 1.58E-04 |
| ASTN1 | 4 |  | 2938.30204 | 1.88E-04 |
| CERCAM | 4 |  | 221.0133318 | 1.70E-04 |
| AKAP4 | 4 |  | 1352.262137 | 1.72E-04 |
| XPNPEP1 | 4 |  | 238.1530446 | 1.78E-04 |
| C19orf10 | 4 |  | 128.197478 | 1.97E-04 |
| MRPS21 | 3 |  | 406.8920009 | 1.81E-04 |
| PCYT1B | 3 |  | 1849.157724 | 2.04E-04 |
| MVP | 3 |  | 283.5133676 | 1.85E-04 |
| PRR5 | 3 |  | 99.84740767 | 1.92E-04 |
| MINPP1 | 3 |  | 166.6726676 | 1.88E-04 |
| HSD11B2 | 3 |  | 266.6927109 | 1.81E-04 |
| ATP6V0E1 | 3 |  | 0 | 1.78E-04 |
| SFTPC | 3 |  | 0 | 1.99E-04 |
| CCDC109B | 3 |  | 266.5510316 | 1.63E-04 |
| MCU | 3 |  | 288.8050883 | 1.70E-04 |
| ZRANB1 | 3 |  | 219.8538836 | 1.92E-04 |
| CCDC8 | 3 |  | 763.8692906 | 1.88E-04 |
| ETNPPL | 3 |  | 214.1630513 | 1.65E-04 |
| GXYLT2 | 3 |  | 1345.520324 | 1.59E-04 |
| CA8 | 3 |  | 76.02167541 | 1.81E-04 |
| KATNA1 | 3 |  | 40.08475816 | 1.89E-04 |
| MCC | 3 |  | 203.8047305 | 1.65E-04 |
| WBSCR17 | 3 |  | 859.2516769 | 1.79E-04 |
| IMPA2 | 3 |  | 95.52530903 | 1.88E-04 |
| RRBP1 | 3 |  | 316.2239424 | 1.89E-04 |
| EFHD2 | 3 |  | 2889.404467 | 1.78E-04 |
| PEX11G | 3 |  | 222.4459623 | 1.78E-04 |
| TMSB10 | 3 |  | 0 | 1.85E-04 |
| SHD | 3 |  | 177.0501913 | 1.58E-04 |
| HN1 | 3 |  | 83.37486654 | 1.88E-04 |
| FOXO6 | 3 |  | 177.8193786 | 2.06E-04 |
| RASSF4 | 3 |  | 183.5793441 | 1.81E-04 |
| TXNDC17 | 3 |  | 427.2066991 | 1.93E-04 |
| RAVER2 | 3 |  | 1106.234492 | 1.74E-04 |
| TRPM3 | 3 |  | 75.33408909 | 1.66E-04 |
| DMTN | 3 |  | 250.0961656 | 1.82E-04 |
| PLVAP | 3 |  | 30.91124955 | 1.81E-04 |
| PIGX | 3 |  | 127.8007854 | 1.81E-04 |
| ITM2C | 3 |  | 360.0361597 | 1.82E-04 |
| SFXN3 | 3 |  | 364.773889 | 1.47E-04 |
| CDC123 | 3 |  | 82.15428485 | 1.74E-04 |
| NKAPL | 3 |  | 3557.410529 | 1.85E-04 |
| C11orf31 | 3 |  | 47.19892281 | 1.74E-04 |
| USB1 | 3 |  | 24.88411458 | 1.70E-04 |
| AIG1 | 3 |  | 209.9975227 | 1.51E-04 |
| TMEM74 | 3 |  | 386.1932498 | 1.68E-04 |
| MAP7 | 3 |  | 472.0475876 | 1.88E-04 |
| MPPED2 | 3 |  | 4698.537439 | 1.75E-04 |
| SRPX | 3 |  | 64.83751232 | 1.93E-04 |
| MYOT | 3 |  | 195.3789615 | 1.81E-04 |
| ARMC9 | 3 |  | 62.26138134 | 1.79E-04 |
| GIG25 | 3 |  | 13.06182525 | 2.09E-04 |
| C19orf48 | 3 |  | 53.5673671 | 1.72E-04 |
| RNLS | 3 |  | 37.57167682 | 1.89E-04 |
| GPR144 | 3 |  | 1113.149504 | 1.61E-04 |
| TBATA | 3 |  | 96.1664824 | 1.47E-04 |
| OLFML1 | 3 |  | 412.5182233 | 1.73E-04 |
| BCAR3 | 3 |  | 123.9630447 | 1.66E-04 |
| GPR89A | 3 |  | 304.6619298 | 1.70E-04 |
| ATXN10 | 3 |  | 407.2946035 | 1.57E-04 |
| FLVCR2 | 3 |  | 6062.070278 | 1.63E-04 |
| PTGFRN | 3 |  | 933.4899998 | 1.78E-04 |
| DHRSX | 3 |  | 0 | 1.77E-04 |
| SLC36A1 | 3 |  | 121.2644362 | 1.47E-04 |
| CACNA2D4 | 3 |  | 133.9979682 | 1.80E-04 |
| KDM3B | 3 |  | 25.37516242 | 1.86E-04 |
| AFAP1L2 | 3 |  | 90.13529044 | 1.68E-04 |
| ADARB2 | 3 |  | 104.044804 | 1.92E-04 |
| C1orf168 | 3 |  | 3003.93487 | 1.59E-04 |
| C1QTNF3 | 3 |  | 83.8686471 | 1.94E-04 |
| TPST2 | 3 |  | 212.1661607 | 1.87E-04 |
| PTRH1 | 3 |  | 2987.243823 | 1.88E-04 |
| CAPN5 | 3 |  | 16.63787937 | 1.91E-04 |
| PDDC1 | 3 |  | 46.00120885 | 1.64E-04 |
| TNFSF13 | 3 |  | 78.88172943 | 1.75E-04 |
| CA1 | 3 |  | 117.4146454 | 1.67E-04 |
| ENPP5 | 3 |  | 144.2111286 | 1.57E-04 |
| LGI4 | 3 |  | 127.0849204 | 1.65E-04 |
| GLIPR2 | 3 |  | 1139.925112 | 1.76E-04 |
| C20orf194 | 3 |  | 424.4567603 | 1.81E-04 |
| NPR3 | 3 |  | 356.4023673 | 1.76E-04 |
| SPINT2 | 3 |  | 207.9432254 | 1.84E-04 |
| PCED1A | 3 |  | 180.1168117 | 1.89E-04 |
| SLC38A3 | 3 |  | 1675.246914 | 1.76E-04 |
| GAS2L1 | 3 |  | 4.597935479 | 1.87E-04 |
| BHLHE22 | 3 |  | 50.39231957 | 1.82E-04 |
| SMAP2 | 3 |  | 660.9796378 | 1.84E-04 |
| VEZF1 | 3 |  | 269.630461 | 1.56E-04 |
| LTK | 3 |  | 1887.068973 | 1.92E-04 |
| TNFRSF21 | 3 |  | 10.05114281 | 2.10E-04 |
| ARL4D | 3 |  | 831.6326954 | 1.85E-04 |
| PHLDA1 | 3 |  | 507.7484593 | 1.98E-04 |
| CIRBP | 3 |  | 195.8312549 | 1.89E-04 |
| ELF4 | 3 |  | 278.2957547 | 1.97E-04 |
| SLC50A1 | 3 |  | 5936.821348 | 1.72E-04 |
| IL17B | 3 |  | 689.2328756 | 2.06E-04 |
| MTUS1 | 3 |  | 204.7963801 | 1.78E-04 |
| ZNF711 | 3 |  | 171.8901206 | 1.76E-04 |
| CHIA | 3 |  | 6.270807367 | 1.81E-04 |
| GPR137B | 3 |  | 1280.606505 | 1.67E-04 |
| FAM110A | 3 |  | 1833.599422 | 1.95E-04 |
| TENM4 | 3 |  | 3030.100641 | 1.68E-04 |
| ZMAT3 | 3 |  | 0 | 1.87E-04 |
| TP53I3 | 3 |  | 0 | 1.87E-04 |
| MSANTD3 | 3 |  | 282.6503812 | 1.75E-04 |
| NACC2 | 3 |  | 816.1807541 | 1.56E-04 |
| FAM49A | 3 |  | 148.8947934 | 1.66E-04 |
| TMTC4 | 3 |  | 88.07078597 | 1.70E-04 |
| NPNT | 3 |  | 1496.159422 | 1.96E-04 |
| ARMC10 | 3 |  | 53.53122681 | 1.64E-04 |
| FMO1 | 3 |  | 56.36390248 | 1.66E-04 |
| AIF1L | 3 |  | 87.81876181 | 1.84E-04 |
| ZXDC | 3 |  | 1369.958829 | 1.98E-04 |
| PI15 | 3 |  | 3070.292742 | 1.71E-04 |
| PRLH | 3 |  | 2963.353936 | 1.89E-04 |
| PPP6R3 | 2 |  | 36.12960312 | 1.68E-04 |
| MRPL14 | 2 |  | 11.15821574 | 1.68E-04 |
| ZNRF3 | 2 |  | 45.78028384 | 1.61E-04 |
| CCT8L2 | 2 |  | 0 | 1.91E-04 |
| PHF10 | 2 |  | 55.05946844 | 1.80E-04 |
| FHR2 | 2 |  | 0 | 1.61E-04 |
| SCGB1D2 | 2 |  | 2958 | 1.54E-04 |
| CRLF1 | 2 |  | 52.37568027 | 1.90E-04 |
| DTX4 | 2 |  | 26.05100415 | 1.79E-04 |
| CSNK1G1 | 2 |  | 1055.62393 | 1.81E-04 |
| KIAA1549L | 2 |  | 0 | 1.65E-04 |
| BZRAP1 | 2 |  | 40.9581931 | 1.53E-04 |
| SCARF2 | 2 |  | 47.78890876 | 1.58E-04 |
| CPA3 | 2 |  | 0 | 1.81E-04 |
| OR1J2 | 2 |  | 193.5902773 | 1.79E-04 |
| ELL3 | 2 |  | 0 | 1.49E-04 |
| CLEC1A | 2 |  | 2958 | 1.92E-04 |
| TENM1 | 2 |  | 39.3765458 | 1.71E-04 |
| CCDC136 | 2 |  | 148.0256287 | 1.57E-04 |
| PDE7A | 2 |  | 112.0654646 | 1.73E-04 |
| ADM5 | 2 |  | 92.90824068 | 1.48E-04 |
| HDX | 2 |  | 19.36252507 | 1.78E-04 |
| TMEM98 | 2 |  | 31.38868569 | 1.70E-04 |
| FXYD5 | 2 |  | 256.1471821 | 1.93E-04 |
| TMEM51 | 2 |  | 118.5476753 | 1.42E-04 |
| PRG2 | 2 |  | 0.578976823 | 1.93E-04 |
| C18orf8 | 2 |  | 60.18774394 | 1.84E-04 |
| AP4S1 | 2 |  | 43.49042585 | 1.78E-04 |
| NMRK1 | 2 |  | 24.46671886 | 1.56E-04 |
| NBPF1 | 2 |  | 4 | 0.25 |
| NEK6 | 2 |  | 171.067161 | 1.80E-04 |
| STOML1 | 2 |  | 34.14320448 | 1.54E-04 |
| KDELC1 | 2 |  | 35.11171641 | 1.36E-04 |
| BIVM | 2 |  | 1686.565371 | 1.62E-04 |
| LEPROTL1 | 2 |  | 32.70780776 | 1.58E-04 |
| S100A13 | 2 |  | 0 | 1.59E-04 |
| IGSF10 | 2 |  | 1589.869097 | 1.63E-04 |
| LRRC28 | 2 |  | 80.05760025 | 1.74E-04 |
| IGDCC3 | 2 |  | 1434.215971 | 1.66E-04 |
| CARD16 | 2 |  | 0 | 1.82E-04 |
| HBM | 2 |  | 63.5767446 | 1.75E-04 |
| SPNS2 | 2 |  | 0 | 1.80E-04 |
| CNPY4 | 2 |  | 27.34451646 | 1.78E-04 |
| KLF15 | 2 |  | 35.32604232 | 1.82E-04 |
| SLC48A1 | 2 |  | 640.6021885 | 1.67E-04 |
| PDZD11 | 2 |  | 2958 | 1.64E-04 |
| ZNF668 | 2 |  | 169.9674992 | 1.59E-04 |
| GPR101 | 2 |  | 29.34924038 | 1.84E-04 |
| TMEM204 | 2 |  | 0 | 1.54E-04 |
| TM2D2 | 2 |  | 0 | 1.49E-04 |
| PPAPDC1B | 2 |  | 0 | 1.49E-04 |
| UBTD2 | 2 |  | 29.79938724 | 1.55E-04 |
| HAPLN3 | 2 |  | 16.51799908 | 1.74E-04 |
| FAM168B | 2 |  | 201.4849374 | 1.73E-04 |
| MFSD12 | 2 |  | 2958 | 1.31E-04 |
| HTATIP2 | 2 |  | 0 | 1.93E-04 |
| PALM2 | 2 |  | 49.02705232 | 1.83E-04 |
| BNC1 | 2 |  | 50.42164049 | 1.91E-04 |
| NETO1 | 2 |  | 40.64933188 | 1.53E-04 |
| C7orf61 | 2 |  | 0 | 1.72E-04 |
| C11orf80 | 2 |  | 2958 | 1.52E-04 |
| C3orf14 | 2 |  | 0 | 1.70E-04 |
| TBC1D19 | 2 |  | 2958 | 1.78E-04 |
| ELK3 | 2 |  | 598.9419572 | 1.84E-04 |
| RBP7 | 2 |  | 0 | 1.52E-04 |
| FAM98A | 2 |  | 168.4251523 | 1.82E-04 |
| ZBTB7C | 2 |  | 12.01883967 | 1.67E-04 |
| VSIG10 | 2 |  | 86.68647026 | 1.55E-04 |
| UBN2 | 2 |  | 27.23923325 | 1.59E-04 |
| SPOCK2 | 2 |  | 0 | 1.82E-04 |
| MILR1 | 2 |  | 0 | 1.77E-04 |
| ZFP69 | 2 |  | 31.591521 | 1.62E-04 |
| EMR2 | 2 |  | 53.41485753 | 1.69E-04 |
| MAGEF1 | 2 |  | 25.44503983 | 1.70E-04 |
| SNN | 2 |  | 2958 | 1.37E-04 |
| PAQR8 | 2 |  | 2958 | 1.26E-04 |
| BMF | 2 |  | 42.67410191 | 1.86E-04 |
| VASH2 | 2 |  | 88.94325033 | 1.89E-04 |
| CYB561D1 | 2 |  | 28.40679145 | 1.72E-04 |
| RBM12 | 2 |  | 74.86417944 | 1.60E-04 |
| BPHL | 2 |  | 0 | 1.66E-04 |
| VSTM2L | 2 |  | 0 | 1.75E-04 |
| FAM32A | 2 |  | 2958 | 1.55E-04 |
| MARVELD1 | 2 |  | 79.04969855 | 1.48E-04 |
| BEND6 | 2 |  | 33.92741397 | 1.40E-04 |
| DCAKD | 2 |  | 12.14246277 | 1.66E-04 |
| SLC22A15 | 2 |  | 44.85150478 | 1.64E-04 |
| DNAJC12 | 2 |  | 0 | 1.82E-04 |
| ELMOD1 | 2 |  | 55.16827567 | 1.70E-04 |
| GLI4 | 2 |  | 41.03260459 | 1.58E-04 |
| HKR1 | 2 |  | 18.68495778 | 1.60E-04 |
| IFFO1 | 2 |  | 64.20886904 | 1.31E-04 |
| SPX | 2 |  | 9.633981978 | 1.68E-04 |
| PPP1R16B | 2 |  | 23.99815469 | 1.59E-04 |
| WDR47 | 2 |  | 0 | 1.53E-04 |
| PAAF1 | 2 |  | 2.482203206 | 1.88E-04 |
| S100A16 | 2 |  | 0 | 1.51E-04 |
| C1orf85 | 2 |  | 44.8688311 | 1.57E-04 |
| ZNF280B | 2 |  | 34.40166847 | 1.62E-04 |
| MTUS2 | 2 |  | 2958 | 1.72E-04 |
| STK16 | 2 |  | 20.92745271 | 1.54E-04 |
| CCDC141 | 2 |  | 70.08506792 | 1.41E-04 |
| LPPR4 | 2 |  | 68.4839254 | 1.83E-04 |
| RNF128 | 2 |  | 36.17438232 | 1.89E-04 |
| RCN3 | 2 |  | 56.44595806 | 1.46E-04 |
| METRNL | 2 |  | 25.02578037 | 1.64E-04 |
| NBPF10 | 2 |  | 75.56350572 | 1.64E-04 |
| NBPF9 | 2 |  | 75.56350572 | 1.64E-04 |
| PPM1H | 2 |  | 19.82032119 | 1.62E-04 |
| LCN10 | 2 |  | 4 | 0.25 |
| PRDM4 | 2 |  | 84.06065063 | 1.60E-04 |
| GAL3ST4 | 2 |  | 61.2289446 | 1.52E-04 |
| C17orf62 | 2 |  | 503.3941106 | 1.66E-04 |
| HENMT1 | 2 |  | 127.4816022 | 1.60E-04 |
| WFIKKN2 | 2 |  | 29.77504084 | 1.80E-04 |
| MARCKSL1 | 2 |  | 21.68754715 | 1.66E-04 |
| RANBP17 | 2 |  | 701.3819265 | 1.74E-04 |
| ZNF106 | 2 |  | 1174.049952 | 1.48E-04 |
| PPAP2A | 2 |  | 16.39164327 | 1.71E-04 |
| KRT77 | 1 |  | 0 | 1 |
| KRT31 | 1 |  | 0 | 1 |
| FRAT2 | 1 |  | 0 | 1.75E-04 |
| PPP5D1 | 1 |  | 0 | 1.80E-04 |
| PRKCDBP | 1 |  | 0 | 1.53E-04 |
| DCHS1 | 1 |  | 0 | 1.46E-04 |
| ZKSCAN4 | 1 |  | 0 | 1.45E-04 |
| RPUSD3 | 1 |  | 0 | 1.45E-04 |
| NBPF3 | 1 |  | 0 | 0.166666667 |
| CHRFAM7A | 1 |  | 0 | 1.36E-04 |
| SALL2 | 1 |  | 0 | 1.58E-04 |
| MRAP2 | 1 |  | 0 | 1.46E-04 |
| C15orf41 | 1 |  | 0 | 1.63E-04 |
| UBE2QL1 | 1 |  | 0 | 1.83E-04 |
| DAP | 1 |  | 0 | 1.28E-04 |
| PRB1 | 1 |  | 0 | 1 |
| PROL1 | 1 |  | 0 | 1 |
| REG1B | 1 |  | 0 | 1.49E-04 |
| VSTM4 | 1 |  | 0 | 1.53E-04 |
| NEURL1B | 1 |  | 0 | 1.32E-04 |
| PZP | 1 |  | 0 | 1.69E-04 |
| TBX19 | 1 |  | 0 | 1 |
| SFT2D2 | 1 |  | 0 | 1 |
| MSI2 | 1 |  | 0 | 1.55E-04 |
| ERVFRD-1 | 1 |  | 0 | 1.35E-04 |
| CCDC102B | 1 |  | 0 | 1.42E-04 |
| C12orf49 | 1 |  | 0 | 1.44E-04 |
| PELI3 | 1 |  | 0 | 1.85E-04 |
| RALGAPA2 | 1 |  | 0 | 1.29E-04 |
| THAP6 | 1 |  | 0 | 1.47E-04 |
| ENSG00000254996 | 1 |  | 0 | 1.74E-04 |
| FEZ2 | 1 |  | 0 | 1.54E-04 |
| DDI2 | 1 |  | 0 | 1.69E-04 |
| TBC1D16 | 1 |  | 0 | 1.41E-04 |
| RGN | 1 |  | 0 | 1.63E-04 |
| LEPREL4 | 1 |  | 0 | 1.56E-04 |
| ZNF512B | 1 |  | 0 | 1.75E-04 |
| ZC3H12D | 1 |  | 0 | 1.56E-04 |
| TRO | 1 |  | 0 | 1.75E-04 |
| CLDN16 | 1 |  | 0 | 1.39E-04 |
| C1QTNF2 | 1 |  | 0 | 1.78E-04 |
| SPATA16 | 1 |  | 0 | 1.59E-04 |
| SLC26A9 | 1 |  | 0 | 1.46E-04 |
| TMEM221 | 1 |  | 0 | 1.33E-04 |
| CCDC107 | 1 |  | 0 | 1.06E-04 |
| ZNF334 | 1 |  | 0 | 1.31E-04 |
| SOHLH2 | 1 |  | 0 | 1.60E-04 |
| FOXD4 | 1 |  | 0 | 1.70E-04 |
| NREP | 1 |  | 0 | 1.61E-04 |
| XKR6 | 1 |  | 0 | 1.78E-04 |
| TCEANC2 | 1 |  | 0 | 1.39E-04 |
| SCGB1C2 | 1 |  | 0 | 1.26E-04 |
| TMEM110 | 1 |  | 0 | 1.34E-04 |
| ENSG00000157654 | 1 |  | 0 | 1.68E-04 |
| PAQR9 | 1 |  | 0 | 1.71E-04 |
| ADAT1 | 1 |  | 0 | 1.71E-04 |
| FAM204A | 1 |  | 0 | 1.59E-04 |
| SMPDL3A | 1 |  | 0 | 1.47E-04 |
| SLN | 1 |  | 0 | 1.49E-04 |
| SPATS2L | 1 |  | 0 | 1.61E-04 |
| RNH1 | 1 |  | 0 | 1.84E-04 |
| ENSG00000164096 | 1 |  | 0 | 1.83E-04 |
| C19orf26 | 1 |  | 0 | 1 |
| MIDN | 1 |  | 0 | 1 |
| ZC2HC1B | 1 |  | 0 | 1.44E-04 |
| SUSD1 | 1 |  | 0 | 1.31E-04 |
| MFSD1 | 1 |  | 0 | 1.10E-04 |
| PDLIM2 | 1 |  | 0 | 1.50E-04 |
| SLC22A23 | 1 |  | 0 | 1.51E-04 |
| C1orf54 | 1 |  | 0 | 1.50E-04 |
| TMEM234 | 1 |  | 0 | 1.34E-04 |
| SFT2D1 | 1 |  | 0 | 1.57E-04 |
| RNF157 | 1 |  | 0 | 1.46E-04 |
| FAM162B | 1 |  | 0 | 1.52E-04 |
| FAM171A1 | 1 |  | 0 | 1.52E-04 |
| GPBP1L1 | 1 |  | 0 | 1 |
| CHODL | 1 |  | 0 | 1 |
| AQP8 | 1 |  | 0 | 1.53E-04 |
| LGALS2 | 1 |  | 0 | 1.74E-04 |
| PTPLA | 1 |  | 0 | 1.87E-04 |
| ZNF778 | 1 |  | 0 | 1.38E-04 |
| ZNF330 | 1 |  | 0 | 1.44E-04 |
| HTRA3 | 1 |  | 0 | 1.64E-04 |
| ZNF493 | 1 |  | 0 | 1.37E-04 |
| FBLN7 | 1 |  | 0 | 1.39E-04 |
| SNX25 | 1 |  | 0 | 1.29E-04 |
| ATP13A1 | 1 |  | 0 | 1.62E-04 |
| RCOR3 | 1 |  | 0 | 1.76E-04 |
| LRIF1 | 1 |  | 0 | 1.33E-04 |
| FGFBP3 | 1 |  | 0 | 1.26E-04 |
| TSHZ3 | 1 |  | 0 | 1.37E-04 |
| ENSG00000248871 | 1 |  | 0 | 1.56E-04 |
| TSPAN12 | 1 |  | 0 | 1.49E-04 |
| PKIG | 1 |  | 0 | 1.74E-04 |
| IGFLR1 | 1 |  | 0 | 1.48E-04 |
| TOR2A | 1 |  | 0 | 1.47E-04 |
| SERGEF | 1 |  | 0 | 1.39E-04 |
| PCDHB6 | 1 |  | 0 | 1.14E-04 |
| TMPPE | 1 |  | 0 | 1.69E-04 |
| CSRNP1 | 1 |  | 0 | 1.83E-04 |
| VWA5A | 1 |  | 0 | 1.44E-04 |
| TBC1D32 | 1 |  | 0 | 1.46E-04 |
| PCDH7 | 1 |  | 0 | 1.36E-04 |
| ZNF329 | 1 |  | 0 | 1.71E-04 |
| ZNF775 | 1 |  | 0 | 1.28E-04 |
| LPPR1 | 1 |  | 0 | 1.67E-04 |
| ZNF850 | 1 |  | 0 | 1.24E-04 |
| KAZALD1 | 1 |  | 0 | 0.166666667 |

**Supplementary Table.7 The genes ranked by degree of lightgreen module using cytoHubba plug-in of Cytoscape)**

| **Gene** | **Degree** | **MCODE_Cluster** | **Betweenness** | **Closeness** |
| --- | --- | --- | --- | --- |
| CUL1 | 28 | Cluster 1 | 5419.182405 | 0.001474926 |
| CUL3 | 25 | Cluster 1 | 3328.485797 | 0.001362398 |
| ASB4 | 23 | Cluster 1 | 3082.798574 | 0.00137741 |
| UBE2E2 | 22 | Cluster 1 | 2047.800736 | 0.001386963 |
| UBE2B | 20 | Cluster 1 | 1511.906685 | 0.001338688 |
| ASB2 | 20 | Cluster 1 | 541.8188482 | 0.001226994 |
| FBXO32 | 19 | Cluster 1 | 1055.603947 | 0.001349528 |
| ASB14 | 19 | Cluster 1 | 95.81884819 | 0.00122549 |
| TRIM63 | 18 | Cluster 1 | 1091.093253 | 0.001336898 |
| BTBD6 | 18 | Cluster 1 | 39.16758601 | 0.00122399 |
| YWHAZ | 17 |  | 5854.545641 | 0.001472754 |
| NEDD4 | 17 | Cluster 1 | 111.4951794 | 0.001207729 |
| UBR2 | 16 | Cluster 1 | 0 | 0.001206273 |
| HECTD1 | 16 | Cluster 1 | 0 | 0.001206273 |
| RNF6 | 16 | Cluster 1 | 0 | 0.001206273 |
| ZNRF1 | 16 | Cluster 1 | 0 | 0.001206273 |
| UBA5 | 16 | Cluster 1 | 0 | 0.001206273 |
| HERC3 | 16 | Cluster 1 | 0 | 0.001206273 |
| PAFAH1B1 | 15 | Cluster 3 | 5388.853432 | 0.001453488 |
| MMP2 | 15 |  | 3406.560442 | 0.001295337 |
| IRS1 | 14 |  | 6588.245733 | 0.001459854 |
| ACTB | 14 |  | 5201.907437 | 0.001447178 |
| CFL1 | 13 |  | 3576.589236 | 0.00141844 |
| RANBP2 | 11 | Cluster 3 | 5108.07728 | 0.001420455 |
| TUBB | 11 |  | 3942.932178 | 0.001459854 |
| RPS28 | 11 | Cluster 6 | 2742.933618 | 0.001231527 |
| PDGFRB | 11 |  | 1789.31336 | 0.001290323 |
| PSMD12 | 10 |  | 1945.391139 | 0.001308901 |
| IGFBP7 | 10 | Cluster 2 | 1217.402034 | 0.001239157 |
| ELN | 10 |  | 751.8708904 | 0.001179245 |
| DYNC1LI1 | 9 | Cluster 3 | 3145.429587 | 0.00135318 |
| PSME4 | 9 |  | 2818.716559 | 0.001328021 |
| TGFB3 | 9 |  | 2166.408683 | 0.001322751 |
| HLA-A | 9 | Cluster 2 | 1915.252967 | 0.001088139 |
| SERPINH1 | 9 |  | 1859.71792 | 0.001236094 |
| FEM1A | 9 |  | 1326 | 0.001206273 |
| IGFBP3 | 9 | Cluster 2 | 1308.208883 | 0.001242236 |
| PPP2R5E | 9 | Cluster 3 | 1174.149902 | 0.001396648 |
| SAR1B | 9 | Cluster 2 | 1008.503468 | 0.001025641 |
| SOCS6 | 9 |  | 953.8387139 | 0.001213592 |
| COL18A1 | 9 |  | 847.5396916 | 0.001123596 |
| LAMB2 | 9 | Cluster 2 | 580.8660989 | 0.001035197 |
| CSNK1E | 8 |  | 2156.145722 | 0.001342282 |
| CD74 | 8 | Cluster 2 | 886.1256398 | 0.001036269 |
| TGOLN2 | 8 | Cluster 2 | 697.2848317 | 0.001043841 |
| COL6A2 | 8 |  | 457.5956446 | 0.001116071 |
| HLA-B | 8 | Cluster 2 | 194.5600076 | 9.61E-04 |
| MXRA8 | 8 | Cluster 2 | 172.2023013 | 0.001064963 |
| SHC1 | 7 |  | 3006.502692 | 0.001302083 |
| PPP2R2A | 7 | Cluster 6 | 2532.578731 | 0.00140647 |
| NES | 7 |  | 1812.050607 | 0.001230012 |
| OPA1 | 7 | Cluster 4 | 1184.732807 | 9.57E-04 |
| A2M | 7 |  | 1078.711786 | 0.001187648 |
| MIA3 | 7 | Cluster 2 | 339.7721443 | 0.001048218 |
| HLA-C | 7 | Cluster 2 | 51.96796215 | 9.47E-04 |
| HLA-E | 7 | Cluster 2 | 51.96796215 | 9.47E-04 |
| HLA-F | 7 | Cluster 2 | 51.96796215 | 9.47E-04 |
| ASF1A | 6 |  | 2498.860262 | 0.001164144 |
| NDUFS1 | 6 | Cluster 4 | 2093.841426 | 0.001034126 |
| GNAL | 6 |  | 1866.905086 | 0.001194743 |
| MAGED2 | 6 |  | 1385.641846 | 0.001248439 |
| TCF7L2 | 6 |  | 1354.200093 | 0.001369863 |
| CUL4A | 6 |  | 1246.338857 | 0.001319261 |
| EIF4A2 | 6 |  | 1236.501844 | 0.001207729 |
| DNTTIP2 | 6 |  | 1194.269361 | 0.001041667 |
| BMP1 | 6 |  | 760.3057133 | 0.001146789 |
| ISLR | 6 |  | 616.2884062 | 0.001140251 |
| NID1 | 6 |  | 499.665586 | 0.001034126 |
| IRF9 | 6 | Cluster 2 | 446 | 8.80E-04 |
| SHISA5 | 6 | Cluster 2 | 0 | 0.001017294 |
| TXNRD1 | 5 |  | 2815.494012 | 0.00125 |
| CORO1B | 5 |  | 1869.328027 | 0.001166861 |
| OS9 | 5 |  | 1428.024112 | 0.001201923 |
| CAP2 | 5 |  | 868.947271 | 0.001175088 |
| ARHGEF2 | 5 |  | 862.1810805 | 0.001190476 |
| ADCY2 | 5 |  | 832.8818383 | 0.001113586 |
| CFB | 5 |  | 810.6590414 | 9.95E-04 |
| PHKB | 5 | Cluster 5 | 805.5378755 | 0.001010101 |
| ARMC8 | 5 |  | 791.3436443 | 0.001175088 |
| SEC61B | 5 |  | 755.1374177 | 0.001172333 |
| CD4 | 5 |  | 675.4844576 | 0.001113586 |
| TFAM | 5 | Cluster 4 | 578.1635459 | 9.04E-04 |
| MYL6 | 5 |  | 468.4953102 | 0.001207729 |
| AFG3L2 | 5 | Cluster 4 | 441.4619879 | 9.25E-04 |
| PPP1R3C | 5 | Cluster 5 | 415.7564214 | 9.59E-04 |
| RABEP1 | 4 | Cluster 7 | 1706.115492 | 9.35E-04 |
| BCAS2 | 4 |  | 1187.539989 | 0.001136364 |
| AIMP1 | 4 |  | 1184.858304 | 0.001261034 |
| MNAT1 | 4 |  | 1136.177441 | 0.001269036 |
| PPP1R3A | 4 | Cluster 5 | 1077.157073 | 0.00109529 |
| ANKRD28 | 4 | Cluster 7 | 1015.503175 | 8.11E-04 |
| PDE4D | 4 |  | 1012.67905 | 0.001131222 |
| AQP4 | 4 |  | 981.5713338 | 0.001156069 |
| TAPT1 | 4 |  | 912.4858456 | 0.001036269 |
| RRM2B | 4 |  | 910.1994192 | 9.90E-04 |
| TAB2 | 4 |  | 896.4262328 | 0.001133787 |
| CEP70 | 4 |  | 888 | 0.001187648 |
| RMND5A | 4 |  | 765.1981345 | 0.001213592 |
| FBLN5 | 4 |  | 737.4910223 | 0.001020408 |
| WDR26 | 4 |  | 692.7408002 | 0.001096491 |
| RHOQ | 4 |  | 588.2629234 | 0.001146789 |
| UTP11L | 4 |  | 585.7835075 | 0.001101322 |
| GNAI2 | 4 |  | 475.0362236 | 0.001084599 |
| KIAA0368 | 4 |  | 417.8920925 | 0.001207729 |
| HPCA | 4 |  | 340.0818827 | 0.001041667 |
| ROCK2 | 4 |  | 142.3283367 | 0.001203369 |
| ANKRD46 | 4 |  | 84.5746152 | 0.00120048 |
| COL21A1 | 4 |  | 42.63651745 | 0.001010101 |
| GSPT1 | 4 | Cluster 6 | 34.30916306 | 0.001148106 |
| UPF2 | 4 | Cluster 6 | 32.77361217 | 0.001129944 |
| CENPI | 4 | Cluster 3 | 0 | 0.001230012 |
| APPL1 | 3 |  | 2554.253255 | 0.001132503 |
| PGM1 | 3 |  | 988.3684424 | 0.001066098 |
| KDELR2 | 3 |  | 900.2835124 | 0.001112347 |
| TLK2 | 3 |  | 890 | 9.28E-04 |
| WDR34 | 3 |  | 862.0030942 | 0.001111111 |
| NFYB | 3 |  | 647.6792587 | 9.64E-04 |
| MITF | 3 |  | 583.0861111 | 0.001136364 |
| KPNA1 | 3 |  | 555.3627535 | 0.001240695 |
| TRAF3IP1 | 3 |  | 487.679382 | 9.36E-04 |
| SEC23IP | 3 |  | 482.9026252 | 9.80E-04 |
| JAG1 | 3 |  | 476.0390409 | 9.78E-04 |
| MPP5 | 3 |  | 446.628331 | 9.67E-04 |
| THAP1 | 3 |  | 446 | 9.68E-04 |
| NKIRAS1 | 3 | Cluster 7 | 446 | 7.81E-04 |
| LDB2 | 3 |  | 352.4373558 | 9.81E-04 |
| CD81 | 3 |  | 343.4196661 | 0.001049318 |
| ATP2B2 | 3 |  | 302.1707071 | 9.54E-04 |
| ATG5 | 3 |  | 286.130573 | 0.001142857 |
| IDE | 3 |  | 272.7775438 | 0.00118624 |
| TUBA3D | 3 |  | 171.6574481 | 0.001113586 |
| MPP7 | 3 |  | 110.2080777 | 8.27E-04 |
| PHKA1 | 3 | Cluster 5 | 0 | 9.28E-04 |
| COLGALT1 | 3 |  | 0 | 9.07E-04 |
| ZYG11B | 3 |  | 0 | 0.001179245 |
| PPM1F | 2 |  | 888 | 9.54E-04 |
| PGM2L1 | 2 |  | 604.5501884 | 8.85E-04 |
| MTIF2 | 2 |  | 507.2671899 | 0.001006036 |
| FOPNL | 2 |  | 480.9484684 | 0.001122334 |
| SLC25A6 | 2 |  | 446 | 8.42E-04 |
| PPTC7 | 2 |  | 446 | 7.88E-04 |
| CARTPT | 2 |  | 446 | 9.41E-04 |
| DPH3 | 2 |  | 446 | 6.88E-04 |
| KCNJ12 | 2 |  | 446 | 0.001041667 |
| IWS1 | 2 |  | 352.6122711 | 9.97E-04 |
| SESN1 | 2 |  | 311.5816475 | 0.001057082 |
| NT5DC1 | 2 |  | 252.7331453 | 9.40E-04 |
| HAT1 | 2 |  | 222.3746761 | 9.68E-04 |
| EDF1 | 2 |  | 178.3060776 | 9.12E-04 |
| SLC25A46 | 2 |  | 170.1494785 | 9.44E-04 |
| PHF20 | 2 |  | 164.3715007 | 9.49E-04 |
| USP38 | 2 |  | 160.7298701 | 0.001042753 |
| GOLGA4 | 2 |  | 142.4175325 | 8.57E-04 |
| SNX13 | 2 |  | 134.5398457 | 8.91E-04 |
| DCAF6 | 2 |  | 133.635696 | 0.001077586 |
| POLR3E | 2 |  | 131.5948718 | 8.96E-04 |
| RASGRP3 | 2 |  | 118.6635722 | 9.28E-04 |
| CDNF | 2 |  | 103.0929686 | 0.001010101 |
| LPIN1 | 2 |  | 103.0679654 | 0.001150748 |
| SLC37A4 | 2 |  | 97.00577201 | 8.66E-04 |
| FASTKD2 | 2 |  | 94.70102845 | 8.42E-04 |
| HUS1 | 2 |  | 92.29184365 | 0.001158749 |
| NBR1 | 2 |  | 90.69770442 | 0.001092896 |
| TRIP6 | 2 |  | 82.15649351 | 0.001006036 |
| C2 | 2 |  | 44 | 8.62E-04 |
| DENND1B | 2 |  | 42.33230246 | 9.68E-04 |
| SNAPC3 | 2 |  | 42.20714286 | 8.50E-04 |
| GPHN | 2 |  | 24.18142772 | 8.08E-04 |
| CLIP3 | 2 |  | 20.02902098 | 0.001101322 |
| KCMF1 | 2 |  | 19.54285714 | 9.87E-04 |
| FASTKD5 | 2 |  | 9 | 7.54E-04 |
| OMA1 | 2 |  | 0 | 8.08E-04 |
| MMP16 | 2 |  | 0 | 0.001006036 |
| CTNNA3 | 2 |  | 0 | 0.001173709 |
| TAGLN2 | 2 |  | 0 | 0.001129944 |
| USP25 | 2 |  | 0 | 0.001046025 |
| SEL1L | 1 |  | 0 | 9.48E-04 |
| EIF4E3 | 1 |  | 0 | 9.51E-04 |
| ARHGEF17 | 1 |  | 0 | 9.13E-04 |
| ZCCHC11 | 1 |  | 0 | 9.51E-04 |
| IDI1 | 1 |  | 0 | 7.94E-04 |
| PYGO1 | 1 |  | 0 | 0.001049318 |
| TFIP11 | 1 |  | 0 | 9.07E-04 |
| CNKSR1 | 1 |  | 0 | 1 |
| IL17RD | 1 |  | 0 | 1 |
| TSPO | 1 |  | 0 | 7.09E-04 |
| FGF18 | 1 |  | 0 | 0.001002004 |
| PPM1A | 1 |  | 0 | 6.70E-04 |
| NACA | 1 |  | 0 | 9.66E-04 |
| PRELID1 | 1 |  | 0 | 7.89E-04 |
| JPH1 | 1 |  | 0 | 1 |
| ZC3H12C | 1 |  | 0 | 1 |
| PSTPIP2 | 1 |  | 0 | 1 |
| PTPN18 | 1 |  | 0 | 1 |
| PFKFB1 | 1 |  | 0 | 9.77E-04 |
| KBTBD2 | 1 |  | 0 | 0.001044932 |
| ENSG00000250741 | 1 |  | 0 | 9.03E-04 |
| TIMM8A | 1 |  | 0 | 8.11E-04 |
| BTG1 | 1 |  | 0 | 7.69E-04 |
| SENP2 | 1 |  | 0 | 9.72E-04 |
| OLFML3 | 1 |  | 0 | 9.13E-04 |
| PTMA | 1 |  | 0 | 9.66E-04 |
| ZNF658 | 1 |  | 0 | 7.69E-04 |
| CMYA5 | 1 |  | 0 | 9.63E-04 |
| ACBD5 | 1 |  | 0 | 1 |
| ANKRD26 | 1 |  | 0 | 1 |
| IFNLR1 | 1 |  | 0 | 7.36E-04 |
| RNF125 | 1 |  | 0 | 0.001059322 |
| PCNX | 1 |  | 0 | 8.31E-04 |
| THAP9 | 1 |  | 0 | 7.96E-04 |
| COPRS | 1 |  | 0 | 0.001053741 |
| MAGED1 | 1 |  | 0 | 0.001101322 |
| GKAP1 | 1 |  | 0 | 9.65E-04 |
| LGALS3BP | 1 |  | 0 | 8.40E-04 |
| MSRB3 | 1 |  | 0 | 9.78E-04 |
| ARMCX2 | 1 |  | 0 | 9.31E-04 |
| RNF168 | 1 |  | 0 | 1 |
| FAM175B | 1 |  | 0 | 1 |
| COA7 | 1 |  | 0 | 9.48E-04 |
| PDE12 | 1 |  | 0 | 0.001109878 |
| MYO5B | 1 |  | 0 | 0.001094092 |
| PHTF2 | 1 |  | 0 | 1 |
| ZNF41 | 1 |  | 0 | 1 |
| HEATR3 | 1 |  | 0 | 8.45E-04 |
| CNPY3 | 1 |  | 0 | 9.09E-04 |
| PREP | 1 |  | 0 | 1 |
| NPEPPS | 1 |  | 0 | 1 |
| MCPH1 | 1 |  | 0 | 0.001097695 |
| CCDC174 | 1 |  | 0 | 5.96E-04 |
| SCN1B | 1 |  | 0 | 8.45E-04 |
| ATF1 | 1 |  | 0 | 9.07E-04 |
| CGRRF1 | 1 |  | 0 | 9.51E-04 |
| PLCL2 | 1 |  | 0 | 6.65E-04 |
| CDV3 | 1 |  | 0 | 8.84E-04 |
| ZFP36L1 | 1 |  | 0 | 0.001108647 |
| FAM117A | 1 |  | 0 | 8.24E-04 |
| DST | 1 |  | 0 | 8.14E-04 |
| LARP4 | 1 |  | 0 | 8.41E-04 |
| RASSF8 | 1 |  | 0 | 1 |
| PTPN4 | 1 |  | 0 | 1 |
| CD276 | 1 |  | 0 | 7.78E-04 |
